# Supplementary material
Source: publisher figshare collection journal article supplement (https://gsajournals.figshare.com/ndownloader/files/22639091)
Supplement: Supplementary file 1 [file 22639091]

## Sheet: A.thaliana.genomic.features
gene	sift	pi	dNdS	piNpiS	gc.cont	splice.var	centrome.dist	codon.use	reco.rate	mut.rate	te.dist	acr.dist	acr.dens	met.level	met.var	connectivity	expr.level	expr.var	module
AT1G01010	0.95	0.000618705	0.373317	NA	0.441085	1	15082914	55.666	3.15395e-08	6.5e-09	5998	14716	0	0.00597233	220.776	2920.14	243.028	44.2727	turquoise
AT1G01020	0.653917	0.00163154	0.386075	NA	0.380222	6	15079757	49.482	3.14784e-08	6.34e-09	2767	11485	0	0.00632012	126.875	2129.15	365.226	28.6405	tan
AT1G01030	0.839833	0.00136362	0.144742	NA	0.457195	2	15074896	57.7531	3.14463e-08	6.26e-09	0	6901	0	0.000243749	465.38	2421.37	115.012	50.4277	brown
AT1G01040	0.568727	0.00096069	0.122675	NA	0.437642	2	15063424	53.5582	3.14805e-08	6.03e-09	4479	1606	0	0.0863111	16.2184	2171.31	2091.04	22.0126	yellow
AT1G01046	NA	NA	NA	NA	NA	NA	NA	NA	NA	NA	NA	NA	NA	NA	NA	2240.91	8.97209	62.3132	yellow
AT1G01050	NA	0.00145219	NA	NA	0.446009	2	15055375	49.3286	3.14592e-08	6.03e-09	12528	277	0	0.0138524	37.4619	2719.64	1543.66	18.7302	lightgreen
AT1G01060	0.556525	0.00134198	0.411335	NA	0.430857	8	15053180	53.6676	3.13841e-08	5.95e-09	14723	0	0.0352785	0.0154036	43.5098	3079.8	4394.5	131.076	pink
AT1G01070	0.580316	0.00190261	0.199405	NA	0.418033	2	15048101	54.7669	3.14852e-08	5.64e-09	14659	155	0	0.00177943	685.192	2339.35	248.569	46.5015	turquoise
AT1G01080	0.535368	0.0013915	0.369072	NA	0.432768	3	15041575	53.8832	3.16421e-08	5.42e-09	8617	4110	0	0.00192207	156.196	3595.44	2384.63	22.1745	black
AT1G01090	0.811	0.00151315	0.0415311	0.18097	0.486402	1	15039311	48.9443	3.16751e-08	5.41e-09	6372	1865	0	0.00769317	110.645	3028.05	4649.53	23.2543	greenyellow
AT1G01100	1	0.00142142	NA	NA	0.530973	4	15036636	47.9762	3.16804e-08	5.33e-09	4466	0	0.0322581	0.000940588	266.16	2612.3	5462.98	27.8231	tan
AT1G01110	0.547667	0.00130208	0.268255	NA	0.482955	2	15034592	54.9197	3.17686e-08	5.25e-09	939	34	0	0.00749001	168.99	2299.19	176.802	35.0231	blue
AT1G01120	0.912933	0.00105653	0.0235467	NA	0.468809	1	15029381	50.8263	3.18272e-08	5.14e-09	588	0	0.153509	0.00047086	202.067	3104.59	5201.23	41.3498	brown
AT1G01130	0.471	0.00393839	NA	2.44056	0.482667	1	15024640	56.2419	3.18308e-08	4.86e-09	5329	4427	0	0.000216785	351.918	2232.48	57.1457	60.2487	purple
AT1G01140	0.683733	0.00207142	0.04753	NA	0.446903	3	15022379	56.9381	3.19061e-08	4.82e-09	7590	517	0	0.00433122	94.5872	2891.46	4007.09	53.5228	purple
AT1G01150	0.532889	0.00219038	0.688274	NA	0.421002	3	15016634	54.0037	3.21726e-08	4.66e-09	4706	1020	0	0.02053	48.8659	NA	NA	NA	NA
AT1G01160	0.661067	0.00296012	0.294933	NA	0.491304	2	15014206	49.2449	3.22309e-08	4.66e-09	2748	3448	0	0.00123756	253.036	2001.38	1012.63	18.2765	pink
AT1G01170	0.716	0.00306402	0.0253818	NA	0.456349	2	15012614	51.2724	3.22373e-08	4.66e-09	2107	5040	0	0.000208214	541.987	3562.51	1580.48	31.3556	greenyellow
AT1G01180	0.645238	0.00404962	0.210466	1.50181	0.512987	1	15011155	56.8437	3.22974e-08	4.58e-09	0	6499	0	0.0107727	97.3157	2813.53	649.409	32.0636	pink
AT1G01190	0.621609	0.00309459	0.184194	NA	0.477511	2	15003561	59.4792	3.27337e-08	4.5e-09	4199	14093	0	0.000170253	319.553	2302.83	104.143	84.848	black
AT1G01200	0.502357	0.00344606	0.118052	0.590483	0.502801	1	15000059	50.2971	3.29624e-08	4.44e-09	7701	10968	0	0.000285646	567.978	2436.96	46.5442	43.5497	skyblue
AT1G01210	NA	0.00189872	0.124183	NA	0.445483	3	14997923	51.4306	3.29624e-08	4.44e-09	9837	8875	0	0.00261834	153.627	2235.74	296.991	27.5396	tan
AT1G01220	0.743371	0.00251656	0.104232	NA	0.444129	8	14995203	56.5043	3.31883e-08	4.43e-09	12557	3696	0	0.0377731	20.2367	2256.29	878.995	18.9087	yellow
AT1G01225	0.639833	0.00210772	0.128921	2.85122	0.445722	1	14990610	49.088	3.34797e-08	4.39e-09	17150	1970	0	0.000431896	456.499	2386.91	88.9519	29.1598	black
AT1G01230	1	0.00154343	0.0411868	NA	0.447257	1	14989133	51.8001	3.34724e-08	4.39e-09	18627	137	0	0.0101765	79.5438	2896.33	853.667	17.3375	blue
AT1G01240	0.782667	0.00263465	0.30476	NA	0.432731	5	14986680	55.551	3.35004e-08	4.33e-09	21080	0	0.0414508	0.00262057	180.306	2715.69	1298.94	44.7162	lightcyan
AT1G01250	0.568444	0.00200562	0.237712	3.46287	0.52677	1	14982105	54.9748	3.36239e-08	4.32e-09	25655	2255	0	0.000263006	524.667	2538.39	65.2217	68.239	pink
AT1G01260	0.7945	0.00165686	0.0783824	NA	0.44106	3	14977599	52.5157	3.39357e-08	4.24e-09	30161	610	0	0.0195236	40.2008	1756.69	771.912	24.5584	red
AT1G01280	0.517273	0.00128986	0.163238	NA	0.470972	1	14974282	58.632	3.40157e-08	4.13e-09	33478	0	0.119288	0.00727638	215.798	NA	NA	NA	NA
AT1G01290	0.4633	0.00207742	0.238443	NA	0.426814	2	14972343	58.8529	3.4094e-08	4.11e-09	35417	394	0	0.00118544	217.161	1588.61	399.854	27.3749	brown
AT1G01300	0.839462	0.00366877	0.0652803	0.23946	0.518519	1	14969761	53.7935	3.40323e-08	4.08e-09	35486	0	0.121726	0.000237174	263.938	2748.97	2720.23	37.8225	blue
AT1G01305	0.7645	0.0019905	0.43528	0.417335	0.420188	1	14967164	49.7384	3.37698e-08	4.03e-09	34334	559	0	0.000890689	410.424	NA	NA	NA	NA
AT1G01310	0.617636	0.00425105	0.469842	0.730053	0.502755	1	14966391	55.4361	3.37698e-08	4.03e-09	33201	0	0.436029	0.000282027	350.765	NA	NA	NA	NA
AT1G01320	0.687316	0.00170686	0.223501	NA	0.446237	3	14965478	54.8294	3.36134e-08	3.96e-09	23754	86	0	0.0566119	14.1746	2923.98	11763.1	25.1855	yellow
AT1G01335	NA	0.00321633	NA	NA	0.373984	1	14955809	61	3.37201e-08	3.96e-09	23473	0	0.195122	0.000111292	1395.23	NA	NA	NA	NA
AT1G01340	0.868	0.00340805	0.132944	NA	0.435393	2	14954275	54.9769	3.38145e-08	3.93e-09	18407	886	0	0.014063	57.4692	2715.07	371.504	56.057	red
AT1G01350	0.565133	0.00408911	0.101797	3.14213	0.431202	1	14950455	51.5146	3.38183e-08	3.88e-09	16169	4706	0	0.05485	23.9141	2615.39	634.527	19.1243	grey60
AT1G01355	0.5553	0.00257125	NA	NA	0.502183	3	14948056	55.9398	3.38997e-08	3.88e-09	14651	6629	0	0.00339119	785.839	1742.31	24.8992	86.1799	brown
AT1G01360	0.421	0.00158676	0.182664	0.442251	0.441489	1	14944675	46.7387	3.42702e-08	3.8e-09	11070	3048	0	0.000507791	886.834	2364.52	472.532	25.9686	pink
AT1G01370	0.8875	0.00244544	0.584832	NA	0.489758	4	14943056	47.5687	3.46963e-08	3.8e-09	7852	0	0.0421264	0.000495255	213.745	2529.57	82.9519	43.1686	green
AT1G01380	0.392	0.000972937	0.385504	NA	0.428571	3	14939502	52.6804	3.51374e-08	3.72e-09	6317	609	0	0.000907883	921.902	2096.99	25.2047	54.7624	turquoise
AT1G01390	0.602944	0.00221522	0.366138	NA	0.465863	2	14938532	57.757	3.51406e-08	3.72e-09	4483	1579	0	0.0040531	205.74	2328.49	150.822	66.809	brown
AT1G01400	0.555625	0.00192653	1.52757	4.05571	0.484553	1	14935856	58.5453	3.45982e-08	3.56e-09	2121	3739	0	0.00178955	211.201	NA	NA	NA	NA
AT1G01410	NA	0.00095545	0.363278	NA	0.417127	1	14933432	55.5646	3.47658e-08	3.56e-09	133	1751	0	0.007997	153.151	NA	NA	NA	NA
AT1G01420	0.517158	0.00157091	0.480094	NA	0.476289	2	14932178	57.8981	3.49979e-08	3.56e-09	0	0	0.126932	0.00123792	288.614	1966.86	475.642	41.0813	pink
AT1G01430	0.5438	0.00194861	0.353447	40.7192	0.450766	1	14930068	51.6115	3.54634e-08	3.56e-09	2059	0	0.23349	0.000167809	329.381	2887.56	1809.34	32.1193	greenyellow
AT1G01440	0.603417	0.00107683	0.334895	0.448341	0.455639	1	14926917	53.768	3.60354e-08	3.56e-09	5210	0	0.0357787	0.0481401	18.6998	2877.42	893.809	17.5403	brown
AT1G01448	NA	NA	NA	NA	NA	NA	NA	NA	NA	NA	NA	NA	NA	NA	NA	2401.83	242.955	31.2061	blue
AT1G01450	0.635483	0.00423195	0.138715	0.804488	0.422505	1	14922440	56.9874	3.64238e-08	3.51e-09	9687	4359	0	0.0548115	51.0981	NA	NA	NA	NA
AT1G01453	0.68341	0.00306483	NA	NA	0.486207	2	14919956	58.1872	3.73314e-08	3.43e-09	12171	4877	0	0.000209927	322.814	2590.62	14.076	258.525	turquoise
AT1G01460	0.7732	0.00350484	0.123581	1.17684	0.406542	1	14917986	58.0931	3.79866e-08	3.43e-09	14141	1579	0	0.00155548	154.026	NA	NA	NA	NA
AT1G01470	0.5228	0.00272588	0.184761	0.467489	0.484649	1	14915020	57.9329	3.85625e-08	3.43e-09	17107	17	0	0.000293976	329.643	1981.87	2289.23	47.1898	blue
AT1G01480	0.621814	0.0070703	0.16528	3.56298	0.452716	2	14910839	56.6877	3.77434e-08	3.43e-09	15268	1991	0	0.000907517	178.021	2207.65	39.2295	141.015	turquoise
AT1G01490	0.695	0.00517031	0.0474741	NA	0.443902	4	14906528	53.4597	3.69948e-08	3.43e-09	10925	0	0.207464	0.000393782	192.751	2823.67	2058.73	28.0728	grey60
AT1G01500	0.661333	0.00138458	NA	2.72444	0.505081	1	14901512	53.7686	3.69224e-08	3.35e-09	6539	0	0.0190204	0.000231457	314.725	2971.79	535.616	26.8951	blue
AT1G01510	0.561375	0.00104885	0.0726066	1.25239	0.478807	1	14899400	56.7844	3.65981e-08	3.31e-09	3202	2073	0	0.0184264	33.2847	2897.87	961.819	13.9158	yellow
AT1G01520	0.396167	0.00119948	NA	NA	0.407362	5	14896137	54.6463	3.64633e-08	3.28e-09	1238	2358	0	0.00305939	141.029	3028.96	82.3907	113.657	pink
AT1G01530	0.568214	0.00226845	0.623667	13.6636	0.40457	1	14893911	52.8885	3.63116e-08	3.28e-09	4	1124	0	0.130039	36.8055	NA	NA	NA	NA
AT1G01540	0.733333	0.00369478	0.0197064	NA	0.474278	2	14890900	56.6701	3.58393e-08	3.28e-09	1309	0	0.0477251	0.0282282	46.6989	3287.01	3430.3	23.7672	darkred
AT1G01550	0.698286	0.00372207	0.122163	NA	0.44381	2	14887018	53.6481	3.58131e-08	3.28e-09	5191	0	0.121832	0.0129543	81.9244	2319.87	6572.7	16.673	red
AT1G01560	0.83336	0.00207088	0.10016	NA	0.434234	4	14884442	54.6494	3.56186e-08	3.18e-09	3590	2258	0	0.0041584	148.813	2380.96	289.336	163.649	lightyellow
AT1G01570	0.444333	0.00206068	0.163759	NA	0.46732	2	14881610	55.1293	3.53779e-08	3.18e-09	388	0	0.212703	0.000197835	293.144	1837.79	83.4791	50.4961	blue
AT1G01580	0.79725	0.00144618	0.152189	NA	0.439055	2	14877550	56.799	3.52922e-08	3.12e-09	0	1072	0	0.00182524	135.729	2339.9	527.374	98.6966	turquoise
AT1G01590	0.351885	0.00149028	0.363845	5.28973	0.437352	1	14872395	58.3722	3.51107e-08	3.04e-09	0	2286	0	0.00486804	124.907	1586.69	17.445	122.439	brown
AT1G01600	0.7259	0.00264441	0.121878	1.32779	0.502703	1	14867711	57.9387	3.51881e-08	3.02e-09	4675	0	0.153282	0.000203324	283.998	2086.21	135.391	64.4462	green
AT1G01610	0.675143	0.00586333	0.0792734	NA	0.493386	1	14864903	56.1436	3.52383e-08	3e-09	7483	1160	0	0.00177336	178.442	2432.96	1985.95	28.5198	midnightblue
AT1G01620	0.848273	0.00294459	0.0289954	NA	0.521487	2	14860880	43.7472	3.51538e-08	3e-09	11506	0	0.0383183	0.000149683	377.604	3001.19	11572.7	47.578	lightcyan
AT1G01630	0.6131	0.00169953	0.203924	15.5765	0.462878	1	14857746	55.4844	3.50695e-08	2.97e-09	14640	0	0.0972031	0.000229171	314.621	2718.28	1875.72	22.7327	skyblue
AT1G01640	0.752	0.00352981	0.317772	NA	0.463291	2	14855637	52.6906	3.50167e-08	2.97e-09	16749	1898	0	0.00553242	139.155	3013.97	117.155	69.7646	blue
AT1G01650	0.8886	0.00149077	0.0732503	NA	0.45533	4	14853705	55.5725	3.51224e-08	2.97e-09	17807	3830	0	0.045155	19.5365	2574.68	1559.75	23.9002	blue
AT1G01660	0.480882	0.00347524	0.155403	NA	0.454971	2	14846704	55.4132	3.51497e-08	2.95e-09	13009	10831	0	0.0402517	39.2928	2122.56	67.3473	57.4702	red
AT1G01670	0.652714	0.00364945	NA	NA	0.437158	3	14843832	55.0917	3.50577e-08	2.87e-09	9658	13703	0	0.0286206	55.0881	1905.6	126.55	60.9764	red
AT1G01680	0.540929	0.00632026	0.418279	8.08661	0.412082	1	14840283	49.9091	3.5117e-08	2.84e-09	7272	17252	0	0.000226466	633.624	1849.54	90.093	232.782	lightyellow
AT1G01690	0.647429	0.00649466	0.315966	NA	0.438791	3	14837504	54.2829	3.50595e-08	2.8e-09	3190	15376	0	0.010666	54.0138	1628.4	177.453	35.9848	green
AT1G01695	0.59372	0.00379218	NA	5.49281	0.393241	1	14833919	53.6247	3.4846e-08	2.8e-09	1182	13368	0	0.00390373	133.048	1128.3	16.7395	58.5802	pink
AT1G01700	0.59931	0.00333198	NA	NA	0.416667	5	14827238	56.9817	3.50481e-08	2.77e-09	595	6231	0	0.00374619	133.857	1666.89	70.4341	44.0394	blue
AT1G01710	0.753583	0.00384471	0.171205	0.266	0.451713	1	14823717	58.3808	3.53743e-08	2.77e-09	4116	1574	0	0.0291034	25.6039	2956.77	1587.44	17.945	brown
AT1G01715	NA	0.00514537	NA	NA	0.442857	2	14820212	51.8934	3.54134e-08	2.72e-09	7621	15	0	0.00188564	205.681	NA	NA	NA	NA
AT1G01720	0.909091	0.00448735	0.0780634	0.184177	0.508046	1	14818552	52.9445	3.55225e-08	2.72e-09	9281	0	0.235906	0.000197359	279.745	2277.26	1107.51	43.3663	pink
AT1G01725	0.246	0.00161605	NA	NA	0.465608	1	14816753	45.6963	3.55225e-08	2.72e-09	11080	1369	0	0.00013693	689.194	2354.41	240.02	34.2356	blue
AT1G01730	0.5419	0.00219878	0.522317	4.60129	0.494815	1	14815748	50.1485	3.54451e-08	2.72e-09	12085	2374	0	0.00570077	98.2529	2911.93	606.008	40.6611	turquoise
AT1G01740	0.508222	0.00123635	NA	NA	0.428375	5	14814434	56.1224	3.54451e-08	2.72e-09	13399	0	0.0712766	0.0103829	79.2667	1944.88	253.012	28.7291	yellow
AT1G01750	NA	0.00388912	0.285936	NA	0.438356	2	14811357	49.364	3.54544e-08	2.71e-09	16476	286	0	0.0402596	49.2222	3210.78	82.2093	72.122	turquoise
AT1G01760	0.630667	0.00421853	0.46483	NA	0.436252	4	14810279	59.1391	3.53219e-08	2.68e-09	17554	1364	0	0.0322656	31.1868	2063.28	126.012	30.2667	yellow
AT1G01770	0.569548	0.00585163	0.253338	1.49289	0.45445	1	14807945	54.2301	3.51333e-08	2.64e-09	19888	3698	0	0.0264536	36.4101	3064.84	837.509	35.1693	lightcyan
AT1G01780	0.69625	0.00461423	0.156936	NA	0.475728	1	14803784	54.4751	3.50047e-08	2.64e-09	24049	7859	0	0.00149332	252.069	3201.16	400.913	38.9842	blue
AT1G01790	0.595404	0.00274602	0.249932	NA	0.44249	2	14802195	56.4888	3.48069e-08	2.64e-09	18093	1784	0	0.033119	25.2567	3376.24	5746.25	29.4843	brown
AT1G01800	0.243261	0.00217522	0.201815	NA	0.443694	2	14793299	53.1632	3.45509e-08	2.59e-09	14210	0	0.0499728	0.000364909	369.72	2105.8	2261.57	16.8972	brown
AT1G01810	0	0.000586206	0.358912	NA	0.449275	1	14791338	46.6297	3.45509e-08	2.57e-09	13437	1870	0	0.00020371	486.446	2152.24	13.4822	53.6051	magenta
AT1G01820	0.604	0.00195125	0.0989954	2.89329	0.45339	1	14790544	53.9564	3.47052e-08	2.57e-09	10962	0	0.111825	0.0129857	55.5794	3294.34	1739.11	29.6378	blue
AT1G01830	0.3389	0.00169877	0.143608	NA	0.481739	3	14788094	57.9454	3.4543e-08	2.54e-09	6986	0	0.0953368	0.001928	158.094	2973.9	785.791	28.9488	pink
AT1G01840	0.2485	0.00186847	0.158178	NA	0.509804	1	14783008	54.7846	3.45046e-08	2.5e-09	4938	520	0	0.000251674	500.051	1081	34.7597	183.199	brown
AT1G01860	0.880333	0.00219618	0.190363	NA	0.446686	5	14782412	58.045	3.44766e-08	2.5e-09	2986	0	0.0151515	0.0049476	116.292	2966.99	441.428	21.8865	black
AT1G01880	0.491464	0.00141961	0.199438	NA	0.429444	4	14780078	54.4819	3.4495e-08	2.5e-09	0	0	0.122276	0.0116515	69.1387	2252.5	48.4388	34.1728	turquoise
AT1G01900	0.716412	0.0018366	0.1408	0.0447126	0.502796	1	14776376	55.1607	3.45368e-08	2.5e-09	818	702	0	0.00105919	223.606	2626.93	191.047	38.1764	black
AT1G01910	0.612556	0.00111675	0.0386107	NA	0.458065	5	14773444	57.5769	3.446e-08	2.5e-09	3750	3634	0	0.0414013	23.6374	2673.14	1269.91	12.5756	blue
AT1G01920	0.567042	0.00128285	0.47804	NA	0.450844	5	14770562	55.9621	3.42885e-08	2.46e-09	6632	5269	0	0.027503	28.5015	2213.44	586.98	22.6858	magenta
AT1G01930	0.572063	0.0024816	0.231895	12.1505	0.452668	1	14766776	55.7485	3.42423e-08	2.45e-09	10418	2041	0	0.0379159	24.5106	2261.76	482.485	16.9755	grey60
AT1G01940	0.143	0.000867927	0.0470923	NA	0.463768	1	14763659	59.4604	3.42423e-08	2.45e-09	13535	19	0	0.00604215	75.5144	2477.9	303.24	21.276	blue
AT1G01950	0.7245	0.000997276	0.078847	NA	0.44869	4	14761229	55.6886	3.42095e-08	2.45e-09	15965	0	0.00395928	0.039416	19.6942	2959.21	984.493	25.1395	purple
AT1G01960	0.615833	0.00111453	0.124137	1.57458	0.450029	1	14755957	56.3952	3.47176e-08	2.45e-09	12016	0	0.0113311	0.0487018	15.8493	3587.95	3346.49	19.1135	yellow
AT1G01970	0.505	0.00155315	0.181842	NA	0.434959	1	14748304	55.8994	3.46324e-08	2.45e-09	9840	0	0.00811688	0.0327608	33.0514	3123.43	765.043	21.4009	salmon
AT1G01980	0.437375	0.00165792	0.136354	3.29253	0.509225	1	14746437	56.32	3.45853e-08	2.45e-09	7888	292	0	0.000552188	266.823	NA	NA	NA	NA
AT1G01990	0.4507	0.00393666	0.245591	0.26378	0.5	1	14743627	48.2741	3.49047e-08	2.45e-09	5528	411	0	0.000176799	383.283	1859.01	699.864	25.2689	midnightblue
AT1G02000	0.7486	0.00215774	0.0592284	0.0580147	0.532567	1	14741029	52.629	3.51682e-08	2.45e-09	2325	3009	0	0.000311211	287.675	2120.54	556.727	24.9922	brown
AT1G02010	0.551448	0.00296194	0.0525606	NA	0.441288	6	14738932	56.9203	3.51344e-08	2.45e-09	0	5106	0	0.0433448	25.8156	1459.86	412.998	36.8005	pink
AT1G02020	0.581677	0.00375	0.356013	NA	0.502333	3	14733933	55.3544	3.48394e-08	2.45e-09	0	9017	0	0.00098399	229.268	2167.41	434.885	39.6514	pink
AT1G02030	0.321625	0.00325849	NA	0.845648	0.475124	1	14731421	57.5091	3.49098e-08	2.45e-09	374	6883	0	0.00157442	962.377	2140.71	5.97674	131.838	turquoise
AT1G02040	0.431167	0.000583481	0.129206	6.05893	0.471795	1	14728639	57.381	3.49257e-08	2.44e-09	3156	5063	0	0.000183093	569.264	NA	NA	NA	NA
AT1G02050	0.752875	0.00109178	0.122744	1.43659	0.505892	1	14727428	55.4799	3.49561e-08	2.44e-09	4367	3395	0	0.038564	75.2117	1969.2	131.326	69.1249	turquoise
AT1G02060	0.447476	0.00142014	0.292165	0.919286	0.440225	1	14725627	56.2117	3.49007e-08	2.44e-09	6168	999	0	0.00549277	116.574	3447.43	184.115	27.5926	yellow
AT1G02065	0.817187	0.00199772	0.184987	NA	0.55489	2	14721380	52.9107	3.49546e-08	2.44e-09	10415	599	0	0.00022508	314.56	1719.39	29.2465	142.431	green
AT1G02067	NA	NA	NA	NA	0.459459	1	14719600	58.8926	3.47969e-08	2.44e-09	12195	1014	0	NA	NA	NA	NA	NA	NA
AT1G02070	0.414	0.00121151	0.459694	NA	0.517677	1	14716350	58.3241	3.48113e-08	2.44e-09	15445	1865	0	0.00128358	689.216	1841.19	5.09767	138.463	blue
AT1G02074	0.446875	NA	NA	NA	NA	NA	NA	NA	NA	NA	NA	NA	NA	NA	NA	NA	NA	NA	NA
AT1G02080	0.691949	0.00162689	0.191652	NA	0.43051	3	14713210	55.9729	3.41436e-08	2.44e-09	18585	0	0.00927903	0.0513778	12.9021	3056.7	5296.99	21.6038	yellow
AT1G02090	0.80588	0.00268125	0.137596	NA	0.472542	3	14699268	56.1265	3.37552e-08	2.43e-09	32527	5738	0	0.00589132	110.82	2401.8	823.519	16.3413	turquoise
AT1G02100	0.716095	0.00380157	0.20335	NA	0.428428	3	14696733	60.628	3.37594e-08	2.42e-09	29858	2730	0	0.025544	30.8154	2181.02	1306.35	18.4119	blue
AT1G02110	0.671471	0.00151832	0.220371	0.327032	0.539773	1	14693714	54.4294	3.37268e-08	2.42e-09	27146	18	0	0.0239636	53.0787	2489.43	794.981	23.9725	midnightblue
AT1G02120	0.605333	0.00155083	0.264411	NA	0.449082	3	14690856	59.23	3.37658e-08	2.42e-09	22673	43	0	0.0302221	29.6377	2843.34	2999.98	16.3109	red
AT1G02130	0.5205	0.00208736	0.0629049	NA	0.424837	1	14686562	50.0132	3.40324e-08	2.39e-09	20755	0	0.062984	0.00858164	73.1183	2359.87	1088.23	15.2663	pink
AT1G02140	1	0.00250265	0.10021	NA	0.461369	1	14683445	53.267	3.42476e-08	2.39e-09	18218	1052	0	0.000201339	509.913	2653.48	2383.73	13.1692	tan
AT1G02145	0.614522	0.0013597	0.238054	NA	0.413655	4	14681945	60.2313	3.4212e-08	2.37e-09	14055	2552	0	0.0402647	20.0528	2534.07	798.786	14.0307	blue
AT1G02150	0.7954	0.000934366	0.29262	0.848787	0.492063	1	14677923	56.7694	3.45906e-08	2.37e-09	11994	3902	0	0.000694035	241.668	3154.6	3099.66	19.9552	black
AT1G02160	NA	0.000567438	0.26892	NA	0.434783	2	14675801	47.142	3.4621e-08	2.37e-09	11042	2950	0	0.000120039	567.645	2936.78	546.029	23.1711	blue
AT1G02170	0.813667	0.00349219	0.018688	0.504471	0.519928	1	14674881	58.5855	3.46183e-08	2.37e-09	9120	1028	0	0.00526308	158.592	2015.02	1372.95	29.7793	red
AT1G02180	0.633737	0.00782265	0.400925	4.41469	0.469897	1	14673023	56.3221	3.48299e-08	2.37e-09	8025	0	0.0602837	0.0117165	115.201	2300.79	133.239	36.274	greenyellow
AT1G02190	0.654463	0.00326993	0.408281	NA	0.514862	2	14671471	53.7734	3.52832e-08	2.37e-09	4647	42	0	0.00107154	173.382	1137.69	9.49922	265.115	green
AT1G02205	0.585705	0.00507178	0.230212	NA	0.482303	5	14668129	52.1816	3.45733e-08	2.37e-09	95	3384	0	0.00118703	151.515	2515.35	2514.97	81.5825	brown
AT1G02210	0.406077	0.00495394	NA	16.1537	0.344697	1	14658997	47.98	3.46011e-08	2.37e-09	3493	832	0	0.000468816	874.191	NA	NA	NA	NA
AT1G02220	0.423237	0.0094772	0.54365	5.67205	0.419409	1	14657895	50.0561	3.46377e-08	2.36e-09	590	1934	0	0.00103057	253.934	1516.89	197.143	91.373	red
AT1G02230	0.659233	0.0102086	0.585901	1.39969	0.413889	1	14651580	51.4687	3.49049e-08	2.35e-09	1128	8249	0	0.0002636	335.083	1822.73	95.5085	96.9109	red
AT1G02250	0.494636	0.00244363	NA	NA	0.419651	1	14648685	56.0869	3.48444e-08	2.35e-09	4023	11144	0	0.0018488	156.032	962.097	5.56899	118.82	red
AT1G02260	0.846525	0.00640819	0.118023	NA	0.455268	2	14646345	52.8857	3.47834e-08	2.34e-09	6363	9730	0	0.0348643	56.0823	1703.1	607.109	42.927	blue
AT1G02270	0.671115	0.00582955	0.144803	NA	0.41512	2	14643427	58.2609	3.46806e-08	2.34e-09	9281	6406	0	0.0202927	48.1881	2844.42	931.412	27.4733	red
AT1G02280	0.9385	0.000920389	0.0683885	NA	0.427293	2	14638122	52.9117	3.49981e-08	2.34e-09	10374	2276	0	0.0451979	21.8099	3031.21	1991.49	24.2402	black
AT1G02290	0.421364	0.00134104	0.597125	2.97349	0.422673	1	14636084	53.3723	3.50235e-08	2.33e-09	8057	0	0.0183968	0.0142707	55.5082	2901.93	267.967	18.3556	blue
AT1G02300	0.578129	0.00387102	0.271303	0.747768	0.422807	1	14633438	54.9725	3.49706e-08	2.33e-09	5281	0	0.0397845	0.000799851	202.086	2760.06	2151.12	60.156	blue
AT1G02305	0.87796	0.00369746	0.0974299	0.0778587	0.426997	1	14630857	51.1205	3.50564e-08	2.33e-09	2636	2486	0	0.0206868	36.3518	3098.83	3102.09	26.0039	blue
AT1G02310	0.703757	0.00255344	0.196442	NA	0.440586	2	14628412	56.7345	3.50267e-08	2.33e-09	0	437	0	0.000966632	219.17	2479.5	18.9721	147.256	turquoise
AT1G02320	NA	0.000583014	NA	NA	0.367347	1	14624717	61	3.50598e-08	2.33e-09	176	85	0	6.18e-05	1729.16	NA	NA	NA	NA
AT1G02330	0.837731	0.00225326	0.0505692	0.640804	0.436905	1	14624599	53.0589	3.50167e-08	2.33e-09	294	0	0.00597729	0.0251118	69.8542	1903.65	585.291	21.9361	grey60
AT1G02335	0.6748	0.00219978	0.0775833	0.554042	0.459091	1	14622791	58.367	3.48402e-08	2.33e-09	2102	0	0.0659609	0.000779006	457.567	2642.99	370.969	39.4149	darkgreen
AT1G02340	NA	0.00280686	0.45693	NA	0.409556	2	14620929	55.5274	3.48624e-08	2.33e-09	3964	41	0	0.000831423	289.852	1595.61	549.98	66.3939	greenyellow
AT1G02350	NA	0.00254492	NA	2.10335	0.439716	1	14616727	58.1715	3.46115e-08	2.33e-09	3388	0	0.00456621	0.000135901	472.46	2008.93	152.716	46.9679	greenyellow
AT1G02360	0.513214	0.00287042	0.141349	NA	0.453333	3	14614662	59.6433	3.46173e-08	2.33e-09	745	0	0.266162	0.000824664	397.268	2180.71	487.501	82.1558	red
AT1G02370	0.656053	0.00386371	0.18629	1.0482	0.439281	1	14612172	54.8324	3.46653e-08	2.33e-09	197	2104	0	0.00607644	145.487	2592.63	206.984	29.6857	magenta
AT1G02380	0.551533	0.00746602	0.400349	7.56367	0.431034	1	14609600	59.0509	3.4576e-08	2.33e-09	2769	4362	0	0.00106104	236.053	2678.87	138.234	62.817	salmon
AT1G02390	0.680643	0.00177668	0.23414	0.598809	0.443189	1	14605895	52.6745	3.45188e-08	2.32e-09	6474	101	0	0.000254437	365.249	3301.65	285.236	73.1348	purple
AT1G02400	0.555222	0.00256316	0.292033	NA	0.459596	2	14599745	57.9812	3.45271e-08	2.32e-09	9426	0	0.202314	0.000147485	360.715	2045.15	285.701	103.658	purple
AT1G02405	0.345667	0.00175487	0.87337	NA	0.520988	1	14596671	58.0729	3.45444e-08	2.32e-09	8450	811	0	0.000346321	429.915	1754.11	8.22946	92.4338	brown
AT1G02410	0.6515	0.00273566	0.324458	NA	0.446547	3	14595685	48.9441	3.45444e-08	2.32e-09	6098	64	0	0.00697214	70.7519	3218.38	729.609	18.9995	brown
AT1G02420	0.647286	0.00114153	0.131978	2.99911	0.405827	1	14592906	55.4637	3.4563e-08	2.32e-09	3919	71	0	0.0754673	18.7512	2410.37	84.2961	25.6595	yellow
AT1G02430	0.740429	0.00296989	0.989437	NA	0.438045	2	14591495	60.229	3.45251e-08	2.32e-09	2745	1482	0	0.0375958	37.9549	1838.24	45.5659	29.9267	magenta
AT1G02440	0.5362	0.00290649	NA	NA	0.438045	2	14590173	58.7059	3.45251e-08	2.32e-09	1522	1269	0	0.00164962	255.755	2708.01	15.0496	94.3787	lightyellow
AT1G02450	0.285	0.00106623	0.5323	NA	0.41958	1	14588628	58.1384	3.45094e-08	2.32e-09	538	285	0	0.000344439	458.835	2644.25	62.8791	139.292	lightyellow
AT1G02460	0.870682	0.00320471	0.125384	0.0722705	0.46206	1	14582082	58.8032	3.46736e-08	2.28e-09	2492	5389	0	0.00060493	236.994	3026.02	55.6388	67.4255	midnightblue
AT1G02470	0.303714	0.00161943	0.339633	NA	0.401207	2	14574780	53.6985	3.48277e-08	2.26e-09	0	4271	0	0.13555	60.0964	2446.78	53.5736	97.5781	red
AT1G02475	0.859778	0.00180856	0.153942	1.24559	0.419697	1	14572846	58.367	3.47959e-08	2.26e-09	563	2570	0	0.000696013	266.408	2419.1	1609.78	20.0452	brown
AT1G02490	NA	0.00317611	NA	NA	0.452991	1	14569976	61	3.4971e-08	2.26e-09	3433	1126	0	0.000189574	975.23	NA	NA	NA	NA
AT1G02500	0.83325	0.00777725	NA	NA	0.500846	2	14568454	46.698	3.50257e-08	2.26e-09	4955	0	0.0735967	0.0448315	36.6463	2813.44	9409.34	21.6535	turquoise
AT1G02510	0.614714	0.00428757	0.257529	0.376385	0.444444	1	14566047	53.1571	3.4977e-08	2.26e-09	7362	134	0	0.00102932	334.438	NA	NA	NA	NA
AT1G02520	0.772634	0.00292439	NA	NA	0.448527	3	14563009	57.0913	3.48958e-08	2.25e-09	92	1434	0	0.0547511	34.4314	3058.76	140.192	89.1709	turquoise
AT1G02530	0.687878	0.00307281	0.180593	NA	0.448456	2	14556866	56.9043	3.49826e-08	2.25e-09	103	2859	0	0.0430536	49.9978	985.859	17.8109	99.1923	turquoise
AT1G02540	0.543714	0.00427542	NA	3.20107	0.413517	1	14551718	53.0351	3.51456e-08	2.25e-09	1539	1837	0	0.000832024	310.125	NA	NA	NA	NA
AT1G02550	0.529444	0.0035359	0.232619	1.24866	0.507545	1	14550062	55.4119	3.52646e-08	2.24e-09	27	325	0	0.00195434	567.139	NA	NA	NA	NA
AT1G02560	0.768	0.0053313	0.0413989	0.140063	0.455964	1	14548805	54.0371	3.5322e-08	2.24e-09	142	0	0.0720268	0.0207958	36.1068	3137.51	10138.1	21.7628	lightcyan
AT1G02570	0.6573	0.00656621	NA	1.06115	0.445639	1	14545309	54.679	3.52898e-08	2.24e-09	41	3325	0	0.0053143	184.24	2834.03	7.72248	141.292	turquoise
AT1G02575	0.573667	0.00155298	0.411923	8.54885	0.438026	1	14543534	53.9867	3.54905e-08	2.24e-09	0	5100	0	0.000725123	329.249	NA	NA	NA	NA
AT1G02580	0.519731	0.00384442	0.684258	0.552402	0.419807	2	14541812	54.2724	3.55119e-08	2.24e-09	91	3344	0	0.00527988	163.049	1322.2	6.00155	144.066	turquoise
AT1G02590	0.336333	0.00227092	NA	NA	0.425926	1	14534407	57.1593	3.55769e-08	2.24e-09	6541	0	0.346154	0.000413196	1071.36	NA	NA	NA	NA
AT1G02610	0.595222	0.00319546	0.248654	NA	0.373874	3	14533526	50.9462	3.56172e-08	2.24e-09	3150	48	0	0.0016256	292.317	2510.84	476.371	54.2048	lightcyan
AT1G02620	0.354571	0.00186717	NA	11.8666	0.433604	1	14529453	59.7125	3.5794e-08	2.24e-09	528	73	0	0.000791538	308.073	2090.49	37.2667	158.165	lightcyan
AT1G02630	0.690714	0.00140289	0.0981187	NA	0.44188	2	14525935	53.8134	3.61171e-08	2.24e-09	1053	452	0	0.00477287	205.595	1693.17	11.0791	105.286	greenyellow
AT1G02640	0.55664	0.00169422	0.083132	1.14434	0.494582	1	14522527	56.6901	3.62575e-08	2.24e-09	4461	0	0.360416	0.000223081	243.731	2826.61	1467.65	66.8455	turquoise
AT1G02650	0.470588	0.00287709	0.419267	NA	0.46952	2	14517987	56.0312	3.63898e-08	2.24e-09	9001	859	0	0.000220292	275.629	2262.12	63.0698	69.6477	black
AT1G02660	0.679667	0.00217737	0.181053	0.576252	0.451914	1	14514719	57.9491	3.61616e-08	2.22e-09	12184	0	0.16319	0.0395765	32.9936	2375.78	1734.82	69.6695	saddlebrown
AT1G02670	0.617706	0.00165716	NA	NA	0.435601	7	14510623	55.4671	3.61187e-08	2.19e-09	6737	180	0	0.0180537	31.3483	2557.25	36.3256	52.4328	green
AT1G02680	0.116	0.00305213	0.0852054	NA	0.446194	1	14505920	50.3639	3.61538e-08	2.19e-09	4959	1723	0	0.00214237	198.763	2293.47	339.248	23.7811	cyan
AT1G02690	0.6725	0.00264548	NA	NA	0.461728	2	14502411	55.8879	3.60394e-08	2.19e-09	0	0	0.0234815	0.0194545	46.4293	3603.23	251.575	38.2945	green
AT1G02700	0.643	0.00284257	0.0621508	0.368619	0.502688	1	14498542	50.7721	3.56526e-08	2.19e-09	0	3795	0	0.00288757	152.159	2475.88	79.2806	78.4384	darkgrey
AT1G02705	NA	0.00590575	NA	NA	0.523474	1	14496961	52.6134	3.56526e-08	2.19e-09	1353	5376	0	0.000546593	426.27	NA	NA	NA	NA
AT1G02710	0.136	NA	NA	NA	0.601375	1	14496839	29.7144	3.56526e-08	2.19e-09	1475	5498	0	NA	NA	2258.49	90.3953	91.2718	darkred
AT1G02720	0.697643	0.00337609	0.136873	NA	0.46593	2	14494863	53.5014	3.55289e-08	2.19e-09	3451	7474	0	0.000237036	314.894	2655.91	328.31	25.0957	green
AT1G02730	0.901961	0.00463049	0.0700248	0.035744	0.456571	1	14492043	52.8175	3.54083e-08	2.18e-09	5743	3563	0	0.00164443	146.726	3013.95	682.33	43.9074	green
AT1G02740	0.351167	0.00112526	0.206498	1.50009	0.429878	1	14487215	56.3699	3.55375e-08	2.17e-09	2201	21	0	0.0156522	61.9838	1789.35	310.679	23.2323	red
AT1G02750	0.473548	0.00525573	0.586885	NA	0.403904	2	14484056	60.351	3.57043e-08	2.15e-09	13	0	0.016851	0.0132549	76.0671	2499.53	369.595	23.2331	brown
AT1G02770	0.579115	0.00649967	0.660749	2.16352	0.451104	1	14481672	60.2901	3.58939e-08	2.15e-09	2	2353	0	0.00136862	238.837	930.122	103.445	140.179	brown
AT1G02780	0.92175	0.00697565	0.247614	NA	0.500775	1	14478746	47.2928	3.59714e-08	2.15e-09	0	5279	0	0.000306815	310.606	2712.08	13538	18.9672	tan
AT1G02790	0.844625	0.00145595	0.148663	0.088777	0.461781	1	14476182	54.5006	3.65328e-08	2.15e-09	16	4313	0	0.00251577	237.768	NA	NA	NA	NA
AT1G02800	0.887471	0.00212809	0.127939	0.249206	0.472776	1	14473348	53.8709	3.66856e-08	2.15e-09	2850	406	0	0.000217781	442.491	1804.39	61.9845	68.5085	green
AT1G02810	0.658471	0.00105667	0.0848668	1.63529	0.468966	1	14468484	56.337	3.64217e-08	2.15e-09	7714	638	0	0.000337988	369.072	2028.84	72.9907	169.038	turquoise
AT1G02813	0.7064	0.00330908	0.47346	1.61742	0.464444	1	14465867	55.8935	3.6221e-08	2.15e-09	10331	0	0.291411	0.000181343	531.909	NA	NA	NA	NA
AT1G02816	0.658462	0.0028665	0.219612	0.368409	0.443114	1	14465092	51.612	3.60936e-08	2.15e-09	11106	0	0.0393258	0.000174729	373.021	2289.48	507.332	31.3041	brown
AT1G02820	0.4615	0.0021496	0.305282	NA	0.521739	1	14462889	53.5568	3.59313e-08	2.15e-09	9679	2141	0	0.000206777	435.926	3237.55	313.584	144.746	brown
AT1G02830	0.496333	0.00784091	0.283498	1.63314	0.481297	1	14461461	55.9177	3.59257e-08	2.15e-09	8638	3569	0	0.000853983	401.545	NA	NA	NA	NA
AT1G02840	0.727548	0.00225669	0.0880967	NA	0.472852	5	14459906	49.5629	3.57141e-08	2.15e-09	4253	4862	0	0.0401493	19.5314	2838.65	2870.05	17.6082	turquoise
AT1G02850	0.695051	0.00146207	0.466824	NA	0.439974	5	14456171	51.1805	3.57538e-08	2.15e-09	826	1435	0	0.00235898	141.282	3113.82	602.752	101.891	turquoise
AT1G02860	0.689	0.00125019	0.140345	NA	0.422886	3	14451401	47.8377	3.5571e-08	2.15e-09	680	164	0	0.00228347	156.294	2795.57	593.181	41.168	turquoise
AT1G02870	0.778	0.00256186	0.149727	1.80272	0.463918	1	14449331	54.555	3.54956e-08	2.15e-09	219	2234	0	0.021046	41.6565	2081.04	574.019	25.8218	tan
AT1G02880	0.852316	0.00240154	0.334082	NA	0.43309	6	14444040	54.1066	3.55414e-08	2.15e-09	1085	0	0.0837849	0.00399518	121.721	2620.28	688.122	21.9809	pink
AT1G02890	0.693719	0.00175787	0.317407	NA	0.442662	2	14441461	56.9859	3.54109e-08	2.15e-09	3664	329	0	0.0552861	12.8886	3455.6	3605.61	33.3513	yellow
AT1G02900	0.208	0.000905648	0.825641	NA	0.473829	1	14432941	61	3.53967e-08	2.15e-09	9926	0	0.059719	0.000559054	512.171	3585.05	134.18	84.0376	turquoise
AT1G02910	0.417187	0.00135315	0.22311	NA	0.468429	2	14430977	54.7722	3.52207e-08	2.14e-09	6167	1902	0	0.0777619	15.7644	3556.65	2157.22	19.6524	salmon
AT1G02920	0.579	0.00134437	0.130527	0.116655	0.44127	1	14427967	51.8534	3.52958e-08	2.13e-09	4403	2423	0	0.000930947	296.414	2089.38	1941.95	140.367	red
AT1G02930	0.860857	0.00282448	0.0646353	NA	0.443381	2	14425457	51.7743	3.48682e-08	2.13e-09	1908	0	0.0525937	0.000397312	359.416	2312.69	3604.25	102.446	red
AT1G02940	0.629	0.00590273	0.312748	NA	0.433806	4	14423582	57.1851	3.48322e-08	2.13e-09	93	310	0	0.00562813	143.43	1353.69	9.47442	151.281	brown
AT1G02950	0.72395	0.00107559	0.25339	NA	0.418327	5	14421426	51.62	3.47118e-08	2.13e-09	214	2466	0	0.0100811	112.606	2315.76	73.3938	37.9383	darkgreen
AT1G02960	0.312029	0.000822563	0.513948	NA	0.415254	6	14419738	57.1568	3.46998e-08	2.13e-09	0	3200	0	0.0128088	44.9119	3106.54	660.907	18.9243	blue
AT1G02965	0	0.00271365	NA	3.62988	0.441718	1	14414884	60.4119	3.4731e-08	2.1e-09	0	305	0	0.00235225	1544.53	NA	NA	NA	NA
AT1G02970	0.684312	0.00168008	0.15197	2.96186	0.429807	1	14413239	55.4204	3.47508e-08	2.1e-09	76	12	0	0.00653147	69.8305	2669.06	51.4729	42.5515	green
AT1G02980	0.750278	0.00186001	0.686898	NA	0.425751	2	14409185	57.6612	3.46766e-08	2.09e-09	70	4066	0	0.00340194	115.369	2644.46	2.30078	130.117	turquoise
AT1G02990	0.546805	0.00155159	0.469004	NA	0.403701	6	14405214	53.5574	3.45099e-08	2.09e-09	4041	8037	0	0.0418535	22.5559	2722.75	864.687	17.1365	yellow
AT1G03000	0.66685	0.00142579	0.275931	1.36971	0.440906	1	14398750	56.1818	3.43448e-08	2.06e-09	3699	8542	0	0.0459149	17.9654	2970.29	1083.81	14.8361	cyan
AT1G03010	0.719636	0.00146025	0.105564	NA	0.414698	3	14393355	54.3071	3.43115e-08	2.06e-09	0	4698	0	0.020653	46.6674	2147.25	26.9752	88.3518	turquoise
AT1G03020	1	0.000256466	0.0832092	NA	0.456311	1	14388626	59.4399	3.43125e-08	2.05e-09	0	2611	0	0.000470883	594.623	1797.94	8.27132	292.159	turquoise
AT1G03030	0.514167	0.00152864	0.137909	NA	0.434879	2	14385180	58.1264	3.43112e-08	2.06e-09	3277	0	0.0732943	0.0176509	49.4683	2250.93	471.789	17.0488	turquoise
AT1G03040	0.4795	0.0017453	0.100992	NA	0.472056	3	14382698	52.0519	3.42885e-08	2.06e-09	5759	0	0.0383398	0.00603352	96.992	3037.21	1229.27	15.7882	midnightblue
AT1G03050	0.51965	0.00288546	0.140151	10.8061	0.455556	1	14379060	55.0638	3.43569e-08	2.06e-09	9397	104	0	0.00289704	156.555	NA	NA	NA	NA
AT1G03055	0.4525	0.00259841	0.108004	NA	0.418868	2	14376527	59.8217	3.43908e-08	2.06e-09	11930	2637	0	0.0035876	170.686	3986.69	181.518	67.4211	brown
AT1G03060	0.631397	0.000876516	0.151484	NA	0.429299	4	14374105	56.5872	3.44345e-08	2.04e-09	0	0	0.00793966	0.0661119	10.2448	2887.27	2464.18	24.3002	yellow
AT1G03070	0.632833	0.00158805	0.040284	NA	0.459677	3	14356715	58.0361	3.44956e-08	2.04e-09	563	1521	0	0.00234098	161.708	2512.07	32.6186	47.294	turquoise
AT1G03080	0.529879	0.00159594	0.305641	NA	0.416186	3	14354991	54.5222	3.43764e-08	2.02e-09	2287	0	0.0075522	0.0129298	83.5637	2626.32	2596.9	26.7428	yellow
AT1G03090	0.4995	0.00142646	0.198586	NA	0.457596	2	14347001	56.3211	3.44256e-08	2.02e-09	10277	0	0.029735	0.0188498	44.2989	3186.84	1323.82	68.2634	lightcyan
AT1G03100	0.503385	0.000786882	NA	37.2711	0.414777	1	14342660	54.7219	3.44931e-08	2.02e-09	11709	2377	0	0.0657116	13.4763	2929.27	78.5101	29.7934	darkturquoise
AT1G03103	0.856	0.00250869	0.656024	2.98922	0.472868	1	14339348	58.2728	3.44617e-08	2.02e-09	10353	1021	0	0.000272456	548.014	NA	NA	NA	NA
AT1G03106	NA	0.00672099	NA	NA	0.343434	1	14338444	61	3.44617e-08	2.02e-09	9376	44	0	0.0825287	201.126	1057.55	280.301	220.07	turquoise
AT1G03110	0.652286	0.00159848	0.223629	0.296867	0.437695	1	14337299	56.6828	3.44968e-08	2.02e-09	6434	43	0	0.024158	42.1101	3039.51	260.868	27.8479	tan
AT1G03120	0.5656	0.00189479	0.264321	NA	0.537341	2	14334354	52.7781	3.44976e-08	2.03e-09	5270	1035	0	0.000211297	468.579	2021.75	13.7969	89.5511	darkgrey
AT1G03130	0	0.00105857	0.0597883	NA	0.478049	1	14333238	53.2681	3.457e-08	2.03e-09	4148	0	0.369247	0.000194177	650.513	3185.52	24966.6	46.6004	greenyellow
AT1G03140	0.97175	0.000897181	0.099228	NA	0.467142	1	14332284	49.6646	3.45895e-08	2.03e-09	2107	0	0.172785	0.00966968	82.6977	2742.98	1665.98	20.034	lightcyan
AT1G03150	0.4415	0.00215991	NA	NA	0.415238	1	14330131	59.8763	3.47928e-08	2.03e-09	0	1889	0	0.00893713	97.4631	2290.93	582.699	29.16	lightcyan
AT1G03160	0.496079	0.0020273	0.179434	NA	0.442132	4	14325284	55.6442	3.50205e-08	2.02e-09	601	1781	0	0.0448624	22.4058	3542.97	1759.19	20.7498	greenyellow
AT1G03165	NA	0.00188091	NA	NA	0.393035	1	14320209	61	3.49526e-08	2.01e-09	5676	651	0	0.00441676	198.816	NA	NA	NA	NA
AT1G03170	0.790125	0.00388086	0.555057	3.87779	0.449516	1	14318169	54.7202	3.50618e-08	2.01e-09	7716	151	0	0.00021241	471.057	1426.4	11.1209	98.0588	turquoise
AT1G03180	0.610125	0.00121209	0.482586	NA	0.433584	6	14313187	56.9511	3.47452e-08	2.01e-09	5832	5133	0	0.0100193	74.5467	1665.29	42.4295	61.072	turquoise
AT1G03190	0.755875	0.00115557	0.0860702	NA	0.440931	2	14311018	55.8776	3.4522e-08	2.01e-09	1132	5420	0	0.0546717	15.2756	3417.55	386.612	15.1896	yellow
AT1G03200	NA	0.00067915	NA	NA	0.412698	1	14306026	61	3.44187e-08	2.01e-09	0	2536	0	0.147618	56.5024	1781.68	15.3628	162.628	turquoise
AT1G03210	0.439333	0.0013463	0.296028	NA	0.444444	2	14303641	54.7082	3.44187e-08	2.01e-09	0	1136	0	0.00500519	135.332	2155.93	403.358	44.8793	blue
AT1G03220	0.803774	0.0054056	0.119991	0.609389	0.511521	1	14299713	54.2644	3.43701e-08	2e-09	1353	0	0.0269699	0.000227587	303.856	2129.28	3047.14	62.926	purple
AT1G03230	0.692042	0.001502	NA	0.463602	0.511111	1	14296725	55.6653	3.4319e-08	2e-09	4341	2788	0	0.00225879	126.92	1717.94	680.121	49.9546	red
AT1G03240	0	0.000662112	NA	NA	0.410853	1	14294323	61	3.4319e-08	1.97e-09	6743	5190	0	0.0670377	190.139	NA	NA	NA	NA
AT1G03250	0.313722	0.00259493	0.120822	NA	0.451058	4	14293230	56.7537	3.42877e-08	1.97e-09	7836	6283	0	0.0189535	43.244	2440.58	774.353	15.2101	brown
AT1G03260	0.426	0.00114888	0.0757	NA	0.446061	1	14291096	57.121	3.42212e-08	1.97e-09	9970	8417	0	0.0115323	49.4379	1836.31	300.329	15.017	tan
AT1G03270	0.637286	0.000608546	0.0665987	0.405062	0.441333	1	14287430	58.735	3.43098e-08	1.97e-09	13636	4606	0	0.01418	48.3279	2601.01	105.499	27.4906	black
AT1G03280	0.882	0.00132558	0.17406	NA	0.448611	3	14283575	53.1794	3.43488e-08	1.97e-09	14657	165	0	0.0488685	19.4698	1885.96	1331.41	12.7263	grey60
AT1G03290	0.710538	0.00183753	0.483697	NA	0.410256	6	14279184	53.445	3.46939e-08	1.97e-09	8507	0	0.00358607	0.0168743	38.9155	2970.07	1218.93	31.3039	lightyellow
AT1G03300	0.43429	NA	0.583326	NA	0.434178	1	14275512	58.0411	3.43878e-08	1.97e-09	8637	3652	0	NA	NA	1295.87	192.507	54.2535	darkred
AT1G03310	0.674733	0.000554744	0.252907	NA	0.423179	2	14273132	54.4527	3.41982e-08	1.97e-09	4911	6032	0	0.0225783	56.9671	3037.95	1803.68	29.8849	brown
AT1G03320	0.1925	0.000794347	1.18149	4.71716	0.45098	1	14269556	51.9287	3.40534e-08	1.97e-09	3956	9608	0	0.0191227	132.033	1493.02	4.9969	82.8292	black
AT1G03325	NA	NA	NA	NA	0.31746	1	14269492	57.0787	3.40534e-08	1.97e-09	4545	9672	0	NA	NA	NA	NA	NA	NA
AT1G03330	0.663	0.00121286	NA	NA	0.43617	1	14268611	52.8029	3.39315e-08	1.96e-09	2160	10553	0	0.00386902	154.675	2294.83	614.217	16.9423	tan
AT1G03340	0.444167	0.0008002	0.469249	3.4013	0.425734	1	14266933	56.8247	3.39408e-08	1.96e-09	247	12231	0	0.00107402	224.212	2250.06	86.0713	38.7704	blue
AT1G03350	0.346214	0.00158387	0.348727	2.95918	0.443029	1	14263963	49.0256	3.39127e-08	1.95e-09	0	15201	0	0.00430793	112.761	2052.07	1362.11	14.7077	grey60
AT1G03360	0.3555	0.000882913	0.0950521	2.14319	0.45614	1	14262028	59.1703	3.40324e-08	1.95e-09	1890	17136	0	0.0256213	29.8182	2377.86	247.412	30.3112	magenta
AT1G03365	0.816615	0.00104779	NA	NA	0.421521	2	14260022	55.2954	3.40038e-08	1.95e-09	3896	17224	0	0.0495043	18.6284	2189.45	665.753	13.3751	yellow
AT1G03370	0.605909	0.000552337	0.107421	NA	0.433562	2	14255995	56.8551	3.40389e-08	1.95e-09	7923	12206	0	0.0281099	33.9581	3195.25	2117.76	30.8592	red
AT1G03380	0.672846	0.000896117	0.25121	4.376	0.436806	1	14250778	56.3904	3.41253e-08	1.94e-09	5291	6244	0	0.0292612	20.5036	3217.54	1576.69	21.0649	yellow
AT1G03390	0.5598	0.000553473	0.167011	NA	0.428571	1	14245512	56.3669	3.41253e-08	1.94e-09	4246	5199	0	0.00468741	169.519	NA	NA	NA	NA
AT1G03395	NA	NA	NA	NA	0.39881	1	14244868	59.4157	3.41253e-08	1.94e-09	4506	5459	0	NA	NA	NA	NA	NA	NA
AT1G03400	0.702833	0.00176623	NA	NA	0.467544	2	14243886	57.5208	3.40219e-08	1.94e-09	2413	3366	0	0.00335481	207.776	3730.17	1395.84	52.3204	lightyellow
AT1G03410	0.486231	0.00210263	NA	NA	0.464495	2	14242109	56.5599	3.40691e-08	1.94e-09	0	0	0.0206281	0.0722798	122.881	1073.82	68.876	131.1	turquoise
AT1G03430	0.609429	0.00410566	0.0961373	NA	0.402954	2	14238752	60.8159	3.40757e-08	1.94e-09	54	26	0	0.00302123	163.891	1523.73	522.864	35.1618	blue
AT1G03440	0.8105	0.00168554	0.0964327	0.201626	0.505025	1	14234394	55.9356	3.43169e-08	1.94e-09	4412	0	0.0703307	0.000582632	423.288	2970.07	577.876	34.772	pink
AT1G03445	0.409333	0.00198263	0.434585	NA	0.441646	2	14232135	56.4491	3.46064e-08	1.94e-09	6671	524	0	0.0073748	78.6376	1515.7	5.38915	93.3573	turquoise
AT1G03457	0.640518	0.00510259	0.253226	NA	0.444951	3	14225784	57.2719	3.42491e-08	1.94e-09	13022	784	0	0.0255029	43.5565	2728.89	301.603	51.5083	turquoise
AT1G03470	0.5654	0.00156816	0.288883	NA	0.423457	4	14220650	48.9751	3.42052e-08	1.94e-09	14597	31	0	0.00628712	149.519	2908.65	149.005	81.7773	turquoise
AT1G03475	0.523	0.000916348	0.0401605	NA	0.462532	1	14217692	53.4493	3.42968e-08	1.94e-09	11022	0	0.00855049	0.0264495	24.0688	3236.4	5835.48	23.3501	black
AT1G03490	0.4045	0.00166612	0.902617	NA	0.451537	1	14214671	52.1095	3.42649e-08	1.94e-09	9424	142	0	0.00170378	281.15	NA	NA	NA	NA
AT1G03495	NA	0.000274554	NA	NA	0.474544	1	14213379	58.5139	3.41291e-08	1.94e-09	7854	1434	0	0.00851171	132.212	1780.48	173.64	63.5854	red
AT1G03506	NA	NA	NA	NA	NA	NA	NA	NA	NA	NA	NA	NA	NA	NA	NA	1296.27	8.28372	100.793	turquoise
AT1G03510	0.4622	0.000766562	0.167825	0.81459	0.434884	1	14210458	56.4045	3.40921e-08	1.94e-09	4774	0	0.029932	0.0435271	27.1695	2362.38	35.6	36.6403	blue
AT1G03520	0.722273	0.000776184	0.138902	NA	0.427827	2	14208684	54.9717	3.40171e-08	1.94e-09	2071	0	0.0325135	0.0344456	29.2244	2861.67	482.856	26.1447	lightcyan
AT1G03530	0.627429	0.00159226	0.43704	0.751441	0.467165	1	14206161	54.6147	3.40596e-08	1.94e-09	0	2446	0	0.04983	22.9032	3583.18	370.98	27.166	magenta
AT1G03540	0.535625	0.000975625	0.188666	20.2056	0.45847	1	14202862	57.0419	3.41281e-08	1.94e-09	1129	5745	0	0.0352283	30.9256	2779.79	44.1891	34.9666	yellow
AT1G03550	0.336333	0.000617089	0.0722171	NA	0.447183	7	14200922	57.7136	3.41281e-08	1.94e-09	3069	4458	0	0.0405197	32.1944	1777.7	59.5256	117.478	turquoise
AT1G03560	0.620545	0.000850913	0.130016	3.26304	0.415532	1	14196390	60.2552	3.40341e-08	1.94e-09	7601	0	0.0337896	0.0560575	19.2962	3104.22	270.65	28.4031	turquoise
AT1G03580	NA	NA	NA	NA	NA	NA	NA	NA	NA	NA	NA	NA	NA	NA	NA	3139.88	134.133	102.458	turquoise
AT1G03590	0.510167	0.00161439	0.139138	0.971165	0.448524	1	14192307	57.2309	3.41723e-08	1.93e-09	5329	192	0	0.00647986	104.103	2469.23	952.788	23.1991	brown
AT1G03600	0.8435	0.00102766	0.122476	9.61562	0.521905	1	14188065	50.0756	3.41879e-08	1.93e-09	3253	0	0.346768	0.000189412	387.773	3648.29	9380.56	33.2414	greenyellow
AT1G03610	0.8256	0.00200517	0.12504	NA	0.442287	2	14185813	54.792	3.40768e-08	1.93e-09	0	606	0	0.00898452	113.228	3063.56	1517.83	34.4896	lightcyan
AT1G03620	0.3195	0.00151154	NA	NA	0.444072	13	14182513	59.2081	3.42071e-08	1.93e-09	558	0	0.147287	0.003472	135.617	1115.28	61.6605	81.0314	blue
AT1G03620.	NA	NA	0.116822	NA	NA	NA	NA	NA	NA	NA	NA	NA	NA	NA	NA	NA	NA	NA	NA
AT1G03630	0.80675	0.00186504	0.0345391	NA	0.451907	2	14179022	53.0963	3.42071e-08	1.93e-09	2689	0	0.181861	0.00166091	171.798	4052.46	5794.7	30.9581	salmon
AT1G03650	0.808333	0.00348241	0.273049	0.279891	0.465409	1	14176522	54.1257	3.40288e-08	1.93e-09	1047	2390	0	0.0129372	87.6692	2114.01	103.09	39.604	black
AT1G03660	NA	0.00286682	NA	NA	0.404321	2	14175235	59.9197	3.40288e-08	1.93e-09	0	3677	0	0.00195092	196.667	1843.8	9.1845	116.355	turquoise
AT1G03670	0.606184	0.00827724	NA	4.14193	0.41329	1	14172323	53.4757	3.40288e-08	1.93e-09	877	1853	0	0.00370808	125.847	NA	NA	NA	NA
AT1G03680	0.7388	0.0039988	0.185691	0.266126	0.481481	1	14169773	58.5967	3.40288e-08	1.93e-09	3427	11	0	0.000358039	293.007	3439.3	9313.41	28.098	greenyellow
AT1G03687	0.629444	0.00365769	0.312978	NA	0.470332	2	14168260	58.5471	3.41064e-08	1.93e-09	1238	0	0.0285962	0.0198496	43.3965	2097.36	334.281	21.0945	black
AT1G03700	0.716	0.0013948	NA	2.32815	0.458586	1	14165595	49.2025	3.41064e-08	1.92e-09	0	2600	0	0.00030741	604.797	2583.43	4.83876	141.16	turquoise
AT1G03710	NA	0.000697333	0.33133	NA	0.482759	2	14163155	49.8275	3.41064e-08	1.91e-09	27	5040	0	0.000404799	371.028	1035.77	54.5147	191.408	brown
AT1G03720	0.333333	0.00266132	0.795374	NA	0.419394	2	14161649	59.9777	3.40625e-08	1.91e-09	1533	5230	0	0.000209467	507.464	NA	NA	NA	NA
AT1G03730	1	0.00154733	NA	0.489204	0.46627	1	14155830	39.4141	3.42033e-08	1.88e-09	2899	0	0.301338	0.00016223	419.524	2650.05	372.642	45.6854	purple
AT1G03740	0.855042	0.00136757	NA	NA	0.430949	2	14153119	56.0329	3.42224e-08	1.85e-09	0	0	0.0539308	0.0242691	46.2237	2993.63	2448.25	32.4581	red
AT1G03750	0.601944	0.00104284	0.160216	8.92045	0.425261	1	14148719	57.8323	3.42251e-08	1.85e-09	2475	26	0	0.0463093	19.6915	3488.14	218.752	20.4857	yellow
AT1G03760	0.567567	0.00132198	0.54938	4.45613	0.441327	1	14145483	55.23	3.42954e-08	1.85e-09	388	3262	0	0.00558663	113.823	2832.38	247.571	27.8963	magenta
AT1G03770	0.332815	0.00128969	0.616649	NA	0.431414	6	14141973	56.5049	3.42975e-08	1.85e-09	396	4201	0	0.0406304	29.2671	2749.62	151.18	43.1398	turquoise
AT1G03780	0.624081	0.00152239	0.354231	NA	0.434471	3	14139025	54.939	3.45848e-08	1.85e-09	3344	33	0	0.000939262	163.656	3008.33	205.023	53.1302	green
AT1G03790	0.622118	0.00305643	0.120092	2.09569	0.494078	1	14132255	50.6934	3.48855e-08	1.85e-09	10114	577	0	0.000737992	392.237	2074.86	20.3953	283.188	darkgrey
AT1G03800	0.377571	0.00112397	0.630062	1.97385	0.51897	1	14129441	54.8464	3.49696e-08	1.85e-09	12928	0	0.0140625	0.00107222	692.789	1437.16	14.2946	73.4633	brown
AT1G03810	0.5752	0.00339898	0.242167	3.42942	0.447775	1	14127786	56.1681	3.5121e-08	1.85e-09	12330	1638	0	0.025886	308	NA	NA	NA	NA
AT1G03820	0.594	0.00142008	0.232816	NA	0.427504	1	14126755	52.1963	3.51251e-08	1.85e-09	11023	2669	0	0.0014202	258.805	2115.77	207.274	56.7538	green
AT1G03830	0.300658	0.00127064	NA	NA	0.440828	2	14124861	57.3835	3.52666e-08	1.85e-09	5149	4563	0	0.0736823	14.9321	2756.09	281.115	30.2502	blue
AT1G03840	0.502308	0.00130576	0.177354	NA	0.460224	2	14119075	55.733	3.52727e-08	1.85e-09	1605	7472	0	0.00100068	881.3	3239.34	47.1798	76.1169	turquoise
AT1G03850	0.60125	0.00133508	0.456727	NA	0.43194	3	14110674	47.1083	3.55294e-08	1.85e-09	0	0	0.0494855	0.000138109	438.908	1927.8	394.814	77.0629	cyan
AT1G03860	0.6972	0.00136136	0.0602195	NA	0.471545	3	14107238	53.1634	3.56463e-08	1.85e-09	2074	0	0.0667656	0.0411243	20.0272	2265.47	1609.06	17.8679	magenta
AT1G03870	0.665	0.00193646	0.167593	0.777327	0.487903	1	14104164	55.1876	3.55166e-08	1.84e-09	5148	0	0.109107	0.00326198	711.285	2510.96	3266.15	56.2108	darkred
AT1G03880	0.206	0.000402958	0.155615	NA	0.511696	1	14100794	55.7578	3.55944e-08	1.84e-09	8518	1233	0	0.000901948	280.692	NA	NA	NA	NA
AT1G03890	0.478333	0.00122861	0.13551	11.6086	0.498525	1	14097347	54.6289	3.63513e-08	1.84e-09	11965	2191	0	0.0017033	251.561	NA	NA	NA	NA
AT1G03900	0.645	0.00126998	NA	0.299903	0.504274	1	14095439	52.7182	3.63558e-08	1.84e-09	13873	85	0	0.00875365	90.5999	2560.02	2502.37	17.0651	grey60
AT1G03905	1	0.00150872	0.0457643	NA	0.45819	4	14093145	55.2089	3.63558e-08	1.84e-09	16167	0	0.0239382	0.0170521	63.2615	1731.01	171.13	67.2643	turquoise
AT1G03910	0.6525	0.00108962	0.130125	NA	0.450488	2	14090469	54.6407	3.63369e-08	1.84e-09	18843	2615	0	0.0700371	12.7939	2746.14	1546.43	12.3527	grey60
AT1G03920	0.515385	0.00209461	0.156688	NA	0.42807	3	14085429	56.7612	3.65737e-08	1.84e-09	23883	6712	0	0.00191032	145.909	2470.38	60.6155	37.9595	green
AT1G03930	0.871357	0.00368548	NA	0.412621	0.44774	1	14081857	55.2269	3.71339e-08	1.84e-09	27455	2752	0	0.0482212	31.0749	3188.95	1643.07	19.7568	greenyellow
AT1G03935	NA	NA	NA	NA	NA	NA	NA	NA	NA	NA	NA	NA	NA	NA	NA	2100.68	17.7039	79.4595	blue
AT1G03940	0.4952	0.000676143	0.1942	NA	0.462411	1	14077317	57.8237	3.74778e-08	1.84e-09	31995	0	0.012513	0.00405835	148.275	1600.55	130.681	86.601	brown
AT1G03950	0.70975	0.00407373	0.0679764	0.295478	0.447077	1	14075394	49.7144	3.74554e-08	1.84e-09	33918	0	0.0663657	0.00215253	192.835	1635.37	694.014	28.8623	blue
AT1G03960	0.467	0.000869138	0.199922	NA	0.419497	7	14072902	57.3324	3.72983e-08	1.84e-09	36410	20	0	0.025109	28.0208	3475.85	462.572	24.3064	blue
AT1G03970	0.3232	0.000510276	0.133335	NA	0.469865	1	14068487	52.7067	3.74686e-08	1.84e-09	40825	0	0.0588235	0.000286547	356.455	2012.1	216.279	34.4562	saddlebrown
AT1G03980	0.738571	0.00147586	0.148961	NA	0.413333	4	14067234	55.9505	3.7572e-08	1.84e-09	42078	1184	0	0.00384143	91.0516	1540.6	22.5023	88.4188	green
AT1G03982	0.338	0.00309466	0.946665	NA	0.410112	1	14064294	54.7412	3.75763e-08	1.84e-09	45018	137	0	0.000305641	412.669	NA	NA	NA	NA
AT1G03990	0.517625	0.000815188	0.301309	1.03128	0.460694	1	14061805	53.4976	3.7646e-08	1.84e-09	47507	632	0	0.00267199	143.112	2164.01	231.036	43.0574	yellow
AT1G04000	0.803833	0.00172625	0.973452	2.34654	0.553377	1	14058692	55.3321	3.77493e-08	1.84e-09	50620	0	0.68824	0.000194839	536.407	2692.87	442.105	32.7964	pink
AT1G04010	0.9058	0.00143844	0.116811	NA	0.445321	1	14055588	58.899	3.81645e-08	1.84e-09	53724	1709	0	0.021831	28.9878	1998.64	321.113	19.3148	yellow
AT1G04020	0.536714	0.0012272	0.283595	NA	0.434174	2	14050052	56.2177	3.8349e-08	1.84e-09	59260	7245	0	0.00981822	65.0351	2533.57	159.943	43.6398	green
AT1G04030	0.632889	0.00181652	0.436373	NA	0.429885	2	14046170	53.5748	3.85326e-08	1.84e-09	63142	6927	0	0.0255718	30.325	2390.05	89.1008	30.8505	blue
AT1G04040	0.566333	0.00166337	0.224305	NA	0.463171	1	14044183	49.7124	3.85326e-08	1.84e-09	65129	5932	0	0.000133437	443.977	2287.01	2769.94	40.7637	black
AT1G04050	0.641056	0.00194191	0.586266	NA	0.441723	3	14040947	57.7127	3.89988e-08	1.84e-09	68365	0	0.0107804	0.0441588	20.3486	2161.63	87.5457	37.6027	turquoise
AT1G04070	0.02	0.00011171	0.901071	NA	0.536842	1	14036040	57.4447	3.89572e-08	1.84e-09	73272	0	0.0144928	0.000180055	470.228	2774.08	156.499	25.4745	turquoise
AT1G04080	0.51948	0.00131597	0.253243	NA	0.457524	5	14035233	54.6113	3.90347e-08	1.84e-09	74079	0	0.0134155	0.046841	16.6451	1813.85	4126.09	12.9214	yellow
AT1G04090	0.519316	0.00187863	NA	1.84527	0.4363	1	14029504	53.2906	3.93943e-08	1.84e-09	79808	4933	0	0.012004	67.0577	1265.41	33.8434	65.8802	brown
AT1G04100	0.795	0.00115882	0.291616	NA	0.455471	1	14027075	58.2215	3.95133e-08	1.84e-09	82237	3178	0	0.00622141	116.907	2113.49	158.896	21.9565	turquoise
AT1G04105	NA	NA	NA	NA	0.470149	1	14026815	52.345	3.95133e-08	1.84e-09	82497	4039	0	NA	NA	NA	NA	NA	NA
AT1G04110	0.569875	0.000924626	0.123705	0.965169	0.457474	1	14025248	56.0298	3.97185e-08	1.84e-09	84064	578	0	0.0288578	97.5732	2480.45	110.304	50.4456	green
AT1G04120	0.6545	0.000903078	0.0794094	NA	0.425303	3	14022281	55.9508	3.9675e-08	1.84e-09	86683	0	0.0221505	0.0547411	17.1345	3679.97	2276.19	22.8106	yellow
AT1G04130	0.55825	0.00232758	0.18042	NA	0.445983	2	14013271	57.5915	3.77836e-08	1.84e-09	82195	0	0.0339869	0.00906298	79.0073	2687.18	227.949	26.1313	royalblue
AT1G04140	0.693278	0.00106548	0.230192	NA	0.453401	2	14011002	54.2876	3.76645e-08	1.84e-09	77133	0	0.021423	0.0429957	17.0562	3733.55	3193.42	15.1415	yellow
AT1G04150	0.38	0.000937837	0.273102	2.24825	0.460349	1	14005521	56.7992	3.76528e-08	1.84e-09	73332	0	0.0290493	0.00095557	184.813	2519.05	3.68062	93.053	turquoise
AT1G04160	0.686	0.0037752	0.120125	NA	0.419942	2	14000375	56.8757	3.72354e-08	1.84e-09	61253	138	0	0.0586024	18.7061	2757.14	362.664	30.808	brown
AT1G04170	0.890562	0.00398684	0.0149524	NA	0.438484	2	13989663	53.2483	3.72e-08	1.84e-09	57862	9	0	0.0433477	15.8481	2573.02	2743.01	11.8055	tan
AT1G04180	0.699231	0.0019091	0.060342	0.405132	0.472354	1	13982052	57.5105	3.68504e-08	1.83e-09	51522	1109	0	0.000490047	498.147	2100.54	137.504	80.6784	turquoise
AT1G04190	0.712	0.00194579	0.103846	0.528512	0.43465	1	13980191	55.8432	3.68251e-08	1.83e-09	49038	0	0.044688	0.0204849	49.8718	2777.64	738.904	15.707	magenta
AT1G04200	0.811174	0.00246103	0.141075	NA	0.422465	3	13977150	58.4952	3.64309e-08	1.83e-09	43608	400	0	0.0334305	24.1149	3057.21	1195.06	23.6	red
AT1G04210	0.56813	0.00149152	0.21146	2.16011	0.42348	1	13972170	57.7229	3.63813e-08	1.83e-09	38024	5380	0	0.0503886	15.3457	2667.93	1583.84	14.6151	yellow
AT1G04220	0.524467	0.00241913	0.0570235	1.04927	0.455577	1	13966846	56.8231	3.66149e-08	1.83e-09	34977	6593	0	0.00277606	164.523	2549.24	285.326	112.881	turquoise
AT1G04230	0.5752	0.00147444	0.393173	NA	0.448875	2	13961030	59.3377	3.64628e-08	1.82e-09	28975	591	0	0.0271316	40.5465	2329.46	335.293	13.3878	purple
AT1G04240	0.5295	0.00164329	0.199174	NA	0.395402	2	13958396	56.7168	3.64821e-08	1.82e-09	28074	0	0.201817	5.77e-05	734.802	1951.09	1675.58	36.8473	cyan
AT1G04250	0.7695	0.00168018	0.071011	NA	0.492754	1	13950467	60.2284	3.6445e-08	1.8e-09	19100	1276	0	0.000303839	374.496	3432.93	1950.09	51.1689	brown
AT1G04260	0.476	0.00286401	0.0332652	NA	0.508197	1	13946267	53.6164	3.6493e-08	1.79e-09	16199	0	0.0784771	0.000164191	390.562	2021.65	413.699	17.8862	brown
AT1G04270	0.879833	0.00230517	0.0365074	NA	0.472767	2	13944987	42.8493	3.6493e-08	1.79e-09	14633	0	0.086459	0.00042278	418.716	2899.32	5356.56	23.1129	tan
AT1G04280	0.627316	0.00242647	0.13321	NA	0.447352	2	13943109	57.1706	3.64416e-08	1.79e-09	10672	0	0.249179	0.00147072	187.692	2705.4	1144	33.4787	turquoise
AT1G04290	0.4346	0.00721181	0.1458	NA	0.486172	2	13939248	55.4694	3.64772e-08	1.79e-09	9230	522	0	0.000118575	672.576	1106.64	52.031	87.3184	turquoise
AT1G04300	0.418155	0.00207396	0.462528	NA	0.448446	6	13937981	56.9969	3.65879e-08	1.78e-09	3096	21	0	0.063002	12.9528	2742.27	2425.41	18.5259	yellow
AT1G04310	0.573353	0.00430792	0.123814	NA	0.470588	2	13931805	57.1664	3.67227e-08	1.78e-09	0	0	0.0972674	0.010134	126.14	2660.14	189.352	62.3382	turquoise
AT1G04330	0.704875	0.00396417	0.123428	0.5987	0.544554	1	13925256	56.5962	3.6885e-08	1.78e-09	0	2805	0	0.000514076	426.263	2292.3	14.5752	78.2279	turquoise
AT1G04340	0.640333	0.00260123	0.177289	0.466724	0.47117	1	13923640	58.6449	3.69667e-08	1.78e-09	1357	0	0.038324	0.0184107	43.8779	1960.12	563.912	15.5947	lightgreen
AT1G04350	0.510111	0.00103688	0.258425	NA	0.435826	1	13921635	53.4948	3.69548e-08	1.78e-09	3362	0	0.0943396	0.00100902	246.374	4036.49	1996.73	35.4748	brown
AT1G04360	0.435909	0.00353155	0.172043	28.9992	0.458115	1	13919257	59.296	3.68274e-08	1.78e-09	5400	84	0	0.0008883	356.622	1775.45	114.524	57.9371	brown
AT1G04370	0.167	0.00175377	0.158231	NA	0.5	1	13911512	55.1789	3.69847e-08	1.78e-09	75	7829	0	0.0137375	130.801	NA	NA	NA	NA
AT1G04380	0.67763	0.00651542	0.314189	NA	0.479493	2	13910001	47.2624	3.69557e-08	1.78e-09	1586	9340	0	0.00236825	148.5	910.827	5.33798	90.1774	brown
AT1G04390	0.665511	0.00656656	0.292213	1.63989	0.433034	1	13907235	57.4051	3.68881e-08	1.78e-09	1266	4612	0	0.0704466	13.7086	1875.73	436.085	25.8257	yellow
AT1G04400	0.768225	0.0076811	0.10844	NA	0.445895	2	13901033	55.7826	3.72199e-08	1.78e-09	84	0	0.119623	0.0713382	19.4111	3109.89	4493.15	28.6234	blue
AT1G04410	0.990167	0.00672492	0.0287795	NA	0.488488	1	13897550	44.3394	3.71419e-08	1.78e-09	2887	0	0.0641234	0.0198462	35.843	2899.98	20299.6	17.803	blue
AT1G04420	0.791714	0.00761424	0.20196	0.879904	0.45117	1	13895026	60.4754	3.72013e-08	1.78e-09	461	0	0.0456467	0.0300141	36.3051	3838.44	3048.8	28.1469	black
AT1G04425	NA	NA	NA	NA	NA	NA	NA	NA	NA	NA	NA	NA	NA	NA	NA	1696.32	82.2186	110.816	turquoise
AT1G04430	0.722444	0.00104123	0.0604531	NA	0.440705	3	13888589	53.1539	3.722e-08	1.78e-09	37	0	0.0342163	0.0466942	28.7564	2448.22	4596.19	31.1836	darkorange
AT1G04440	0.651625	0.00162856	0.116841	1.3405	0.443497	1	13884385	52.1509	3.72871e-08	1.78e-09	0	0	0.0171429	0.0290232	28.0883	1663.29	2739.94	15.5627	greenyellow
AT1G04445	0.297333	0.00113501	NA	NA	0.531429	2	13879785	54.9642	3.74213e-08	1.78e-09	0	4535	0	0.000289393	362.266	NA	NA	NA	NA
AT1G04450	0.328333	0.000857384	0.440844	NA	0.457014	1	13878024	52.1324	3.78078e-08	1.78e-09	1428	5574	0	0.00554749	159.221	NA	NA	NA	NA
AT1G04455	NA	0.00044736	NA	NA	0.398305	1	13876276	49.2155	3.80364e-08	1.78e-09	3176	4978	0	0.00142892	854.987	NA	NA	NA	NA
AT1G04470	0.441677	0.0016911	0.130307	1.67457	0.46686	1	13875621	55.3418	3.80364e-08	1.78e-09	3831	759	0	0.0120619	89.8233	NA	NA	NA	NA
AT1G04480	1	0.00423446	NA	NA	0.489362	1	13870620	51.4527	3.80507e-08	1.78e-09	8832	0	0.146089	0.000314937	328.921	2360.39	2685.81	22.0363	tan
AT1G04490	0.785444	0.00283489	0.467394	NA	0.395522	9	13868855	51.9934	3.76838e-08	1.77e-09	10597	1540	0	0.00143939	538.674	2611.79	39.493	67.9751	purple
AT1G04500	0.777	0.00177841	0.105971	NA	0.428941	4	13865134	52.0871	3.77732e-08	1.77e-09	14318	1	0	0.00219294	144.394	2069.62	4.90698	124.839	turquoise
AT1G04510	0.388214	0.00158171	0.131621	NA	0.449109	2	13860062	56.612	3.78401e-08	1.75e-09	19390	1364	0	0.0426669	18.7699	3073.78	1602.67	11.3343	magenta
AT1G04520	0.706	0.00197576	0.110295	NA	0.437229	1	13855093	51.731	3.84425e-08	1.75e-09	17598	0	0.087563	0.000126415	338.657	3164.11	274.988	44.3069	brown
AT1G04530	0.547933	0.00487306	0.339914	3.80588	0.429796	1	13852369	54.6481	3.83603e-08	1.75e-09	15424	0	0.0965042	0.00338864	154.031	4099	2085.04	47.2853	pink
AT1G04540	0.720077	0.00401184	0.137736	0.970625	0.460133	1	13849791	55.053	3.86755e-08	1.75e-09	12431	0	0.0134914	0.000252386	265.512	2525.56	96.4837	48.3379	pink
AT1G04550	0.700143	0.0014881	0.128873	NA	0.462256	2	13846251	51.8335	3.86985e-08	1.75e-09	9473	3508	0	0.00168898	189.58	3448.49	667.854	30.2256	royalblue
AT1G04555	0.8295	0.00365565	0.130481	1.30119	0.464052	1	13844039	51.6295	3.86914e-08	1.75e-09	7386	5720	0	0.00131207	296.93	2286.69	243.059	20.2626	red
AT1G04560	0.6905	0.00481495	0.111724	0.0435989	0.472371	1	13841598	55.6958	3.84134e-08	1.75e-09	5571	8161	0	0.00336176	231.487	1952.15	54.6264	518.31	darkgrey
AT1G04570	0.72475	0.00417063	0.205789	NA	0.440761	2	13839944	51.9759	3.84134e-08	1.75e-09	2754	9815	0	0.00553022	124.743	2335.78	37.0326	66.8759	blue
AT1G04580	0.647048	0.00280118	0.293903	1.62307	0.433981	1	13834540	55.7343	3.7959e-08	1.74e-09	233	3506	0	0.0297562	76.5486	1828.62	32.4264	89.5285	turquoise
AT1G04590	0.492432	0.00413672	0.445218	NA	0.432035	2	13827989	57.2572	3.76413e-08	1.74e-09	6784	0	0.0246998	0.0375272	30.6464	1982.82	461.132	19.523	tan
AT1G04600	0.52375	0.00150893	0.218499	1.72676	0.418448	1	13824783	55.8365	3.74268e-08	1.73e-09	2739	63	0	0.0167376	44.8332	1234.91	56.9814	151.063	red
AT1G04610	0.722889	0.001367	0.0542613	0.0751882	0.461948	1	13807194	54.028	3.66709e-08	1.72e-09	2385	9450	0	0.00044669	325.561	2931.57	17.014	131.215	turquoise
AT1G04620	0.319857	0.0017406	0.268798	30.9672	0.442765	1	13804382	56.72	3.6425e-08	1.72e-09	0	4449	0	0.0233586	30.5865	2448.39	843.887	56.8248	blue
AT1G04625	0.526	0.00123249	0.0375115	NA	0.419897	1	13798714	57.4302	3.63591e-08	1.72e-09	762	1248	0	0.137886	58.6911	836.303	8.60465	147.779	pink
AT1G04630	0.334	0.00147843	NA	NA	0.463964	1	13796811	57.4033	3.63813e-08	1.72e-09	2392	0	0.0326323	0.00194814	201.316	2431.62	580.347	16.4015	tan
AT1G04635	0.7852	0.00165326	NA	0.30484	0.421053	1	13795245	52.922	3.64096e-08	1.72e-09	1480	82	0	9.6e-05	641.203	2714.12	50.0868	38.7653	tan
AT1G04640	0.789111	0.00160387	0.101581	NA	0.429379	2	13794522	56.6683	3.63403e-08	1.72e-09	106	805	0	0.00412921	178.133	3540.32	806.087	31.9818	salmon
AT1G04645	1	0.00140415	1.03059	0.103233	0.421189	1	13792775	59.4539	3.63403e-08	1.72e-09	174	2552	0	0.00359676	824.983	NA	NA	NA	NA
AT1G04650	0.545346	0.00177762	0.326021	0.675972	0.417502	2	13791918	55.1732	3.63407e-08	1.72e-09	1031	3409	0	0.0283266	35.8287	1052.19	74	297.128	green
AT1G04660	0.572917	0.00180427	0.0464261	1.02265	0.56964	1	13786177	49.5496	3.6356e-08	1.72e-09	6772	4046	0	0.000624106	335.456	1945.37	54.1364	108.372	green
AT1G04670	0.685	0.00179689	0.181729	1.75927	0.448819	1	13784716	50.1734	3.6356e-08	1.72e-09	8233	3061	0	0.000152729	554.246	NA	NA	NA	NA
AT1G04680	0.889654	0.00419514	0.034745	0.0405939	0.486883	1	13783078	55.9473	3.63433e-08	1.72e-09	9871	0	0.0696694	0.00168306	147.616	3558.31	2348.88	40.5729	skyblue
AT1G04690	0.95	0.00123447	0.0263808	NA	0.467072	1	13773102	50.7254	3.62347e-08	1.73e-09	19847	0	0.0680386	0.00755511	75.3338	2582.52	2816.97	15.0717	blue
AT1G04700	0.6478	0.00107524	0.197014	NA	0.417705	3	13770406	54.068	3.62662e-08	1.73e-09	22543	709	0	0.0392365	32.0788	2815.89	53.7163	51.8178	turquoise
AT1G04710	0.654462	0.00132727	0.157952	0.943825	0.478979	1	13764660	54.0436	3.62875e-08	1.73e-09	28289	0	0.0169147	0.0237713	31.762	2213.56	619.228	25.6401	brown
AT1G04730	0.6208	0.00126277	0.158915	NA	0.425141	4	13761446	56.6009	3.63572e-08	1.73e-09	31503	2329	0	0.0391609	20.7124	2954.65	142.843	41.2501	green
AT1G04750	0.994125	0.000802993	0.0191407	NA	0.437879	4	13755079	55.9226	3.63051e-08	1.72e-09	37870	0	0.0704483	0.00753351	91.6085	3074.25	2150.46	17.474	blue
AT1G04760	0.4915	0.00125795	0.0548695	NA	0.440422	2	13752012	52.2143	3.62401e-08	1.72e-09	40937	710	0	0.000797781	211.222	2505.5	29.2093	59.9254	green
AT1G04770	0.649	0.00111839	0.14995	NA	0.461681	1	13750271	54.4189	3.62401e-08	1.72e-09	41441	0	0.0228426	0.00148016	250.121	2598.58	663.243	60.2919	purple
AT1G04778	NA	0.000600939	NA	NA	0.555556	1	13746957	50.3227	3.62384e-08	1.72e-09	38725	1424	0	0.000616858	1652.23	1868.87	9.07752	67.0908	turquoise
AT1G04780	0.728	0.000463538	0.0830013	NA	0.451629	1	13745992	51.9129	3.62973e-08	1.72e-09	35497	0	0.0512188	0.0210089	52.4938	2684.21	1790.6	13.5153	red
AT1G04790	0.420818	0.00113863	0.689439	18.4686	0.438845	1	13741556	51.9888	3.62973e-08	1.72e-09	30422	0	0.0208763	0.0775163	12.5942	1833.67	775.847	12.6262	yellow
AT1G04800	0.35125	0.00063636	NA	7.12346	0.532338	1	13738093	39.0601	3.62309e-08	1.72e-09	29812	474	0	0.006818	281.055	2219.7	1872.06	49.5681	black
AT1G04810	0.604222	0.000749402	0.114605	3.34825	0.461411	1	13736465	56.4102	3.62309e-08	1.72e-09	23824	0	0.0181919	0.0483845	15.0532	3097	1978.48	14.6933	yellow
AT1G04820	NA	0.00115054	NA	NA	0.485588	1	13730461	44.6687	3.62308e-08	1.72e-09	20743	66	0	0.00254272	120.797	2930.21	7775.09	29.6815	green
AT1G04830	0.849571	0.000910064	0.0793686	0.585158	0.45942	3	13727971	57.8319	3.62459e-08	1.72e-09	17271	2556	0	0.0364277	23.339	2158.93	743.988	15.3699	greenyellow
AT1G04840	0.553556	0.00103041	0.3003	5.18768	0.416917	1	13724318	57.6099	3.61394e-08	1.72e-09	14263	3753	0	0.00228875	131.658	2352.3	38.6248	33.056	darkturquoise
AT1G04850	1	0.000944814	0.0995498	NA	0.466989	2	13721438	52.6665	3.60718e-08	1.73e-09	10350	0	0.0419927	0.0424871	18.7517	2673.56	3164.95	15.4254	grey60
AT1G04860	0.61815	0.00106108	0.393647	0.340105	0.430353	1	13717509	56.1269	3.60699e-08	1.71e-09	6187	0	0.00491642	0.0756881	13.4971	3036.09	995.687	13.4297	yellow
AT1G04870	0.6445	0.00180363	0.074859	NA	0.455729	2	13713311	57.9274	3.61372e-08	1.71e-09	3469	4179	0	0.0184716	50.4619	2268.16	697.988	22.1355	magenta
AT1G04880	0.5194	0.000878928	0.459432	0.0590187	0.449146	1	13710721	52.612	3.62167e-08	1.71e-09	62	6769	0	0.0102075	73.9488	759.696	32.4233	232.57	turquoise
AT1G04890	0.398091	0.00251121	0.222558	6.76031	0.417476	1	13706163	54.4304	3.63412e-08	1.7e-09	381	11327	0	0.00579905	119.641	NA	NA	NA	NA
AT1G04895	NA	0.00218109	NA	NA	0.414634	1	13703537	49.1918	3.63412e-08	1.7e-09	0	13953	0	0.000195573	708.412	NA	NA	NA	NA
AT1G04900	0.694714	0.000867224	0.107647	2.97562	0.423627	1	13702704	57.0135	3.64035e-08	1.7e-09	107	14786	0	0.0227268	30.4772	2430.53	241.995	27.9631	magenta
AT1G04910	0.655	0.00134196	0.086587	16.4339	0.446154	1	13698674	59.116	3.64553e-08	1.7e-09	4137	18816	0	0.0578649	18.2798	2872.07	979.974	13.6652	blue
AT1G04920	0.716125	0.000727409	0.0615208	0.598287	0.462527	1	13695111	54.4903	3.62459e-08	1.7e-09	7700	14753	0	0.0137522	75.7023	1664.28	86.3473	58.8141	brown
AT1G04930	0.854583	0.00119616	0.50645	NA	0.48944	3	13690280	53.8225	3.63573e-08	1.7e-09	12531	11584	0	0.0171242	36.0929	3304.75	113.422	31.1377	midnightblue
AT1G04940	0.8112	NA	0.121718	NA	0.465455	1	13687363	53.8382	3.64728e-08	1.7e-09	15448	9876	0	NA	NA	2247.69	125.115	33.7893	orange
AT1G04945	0.607259	0.00104848	0.406031	NA	0.439276	4	13687371	57.3746	3.65316e-08	1.7e-09	14457	7594	0	0.0153107	36.2259	3287.6	191.33	26.1178	magenta
AT1G04950	0.3585	0.00151584	0.269711	NA	0.427879	3	13683460	55.0993	3.65316e-08	1.7e-09	10038	3175	0	0.0299865	21.7124	2618.75	770.891	14.5587	blue
AT1G04960	0.1224	0.00144861	0.27399	NA	0.421891	2	13678773	58.2133	3.66487e-08	1.7e-09	6636	0	0.0721063	0.0200918	31.2718	2155.95	783.909	11.3724	pink
AT1G04970	0.6785	0.000902843	0.183808	NA	0.415815	3	13675457	58.6065	3.66359e-08	1.7e-09	3942	0	0.0370079	0.00892128	68.8617	2957.46	1073.91	16.8617	blue
AT1G04980	0.415	0.000612827	0.197402	13.7664	0.438244	1	13672901	56.0523	3.67465e-08	1.7e-09	1351	2295	0	0.000593129	203.834	2122.09	335.336	51.3428	turquoise
AT1G04985	0.852	0.00109761	0.180174	NA	0.469072	2	13670203	52.5897	3.69106e-08	1.7e-09	0	0	0.112807	0.0183466	44.1577	2925.42	1074.93	20.1267	brown
AT1G04990	0.6633	0.000998515	0.626275	NA	0.454106	6	13667933	56.3525	3.72171e-08	1.7e-09	913	0	0.122386	0.00197395	152.334	2971.1	629.184	45.0694	blue
AT1G05000	0.741187	0.00336494	0.145681	NA	0.454301	3	13661006	56.8081	3.73967e-08	1.7e-09	1403	1520	0	0.00263227	164.248	3296.28	225.174	74.597	turquoise
AT1G05005	NA	0.00654734	0.679092	1.59515	0.422515	1	13657497	59.3765	3.73967e-08	1.7e-09	216	2743	0	0.00453021	203.182	NA	NA	NA	NA
AT1G05010	0.7015	0.00578571	0.105146	1.56648	0.466049	1	13655368	50.5208	3.75379e-08	1.7e-09	149	0	0.0278081	0.000136618	367.507	2620.76	11789.8	34.9616	red
AT1G05020	0.643577	0.00195766	0.237579	1.10667	0.476045	1	13651390	57.5628	3.74005e-08	1.7e-09	3752	0	0.0268302	0.00622857	111.469	2335.22	79.4248	53.1959	green
AT1G05030	0.607429	0.00329898	0.342689	NA	0.447619	2	13648497	58.9081	3.73776e-08	1.7e-09	0	2824	0	0.0479183	59.9323	1733.38	521.603	33.6643	blue
AT1G05035	NA	0.00261623	NA	NA	0.363636	1	13641562	52.5347	3.73523e-08	1.69e-09	451	9187	0	0.49157	25.1749	NA	NA	NA	NA
AT1G05040	0.618545	0.0014808	0.272229	NA	0.443114	2	13639176	53.0662	3.71201e-08	1.69e-09	2837	6840	0	0.00255535	180.526	NA	NA	NA	NA
AT1G05055	0.820733	0.0012346	0.0249188	NA	0.458926	1	13637914	57.8804	3.71161e-08	1.69e-09	4099	4402	0	0.0312809	22.2053	2800.03	292.257	14.8489	midnightblue
AT1G05060	0.694071	0.00139384	0.127391	1.22163	0.452756	1	13635543	51.3163	3.71161e-08	1.69e-09	6470	2431	0	0.00584593	106.33	2453.56	629.006	18.7675	cyan
AT1G05061	NA	NA	NA	NA	NA	NA	NA	NA	NA	NA	NA	NA	NA	NA	NA	2089.26	11.4124	57.7159	turquoise
AT1G05065	0.774	0.00135074	0.234883	2.31397	0.43254	1	13631939	49.4655	3.71161e-08	1.69e-09	10074	0	0.027894	0.000139929	719.246	2590.43	35.7783	41.1783	cyan
AT1G05070	0.5268	0.00295039	0.164402	0.689427	0.49009	1	13629538	57.3891	3.70152e-08	1.67e-09	12475	0	0.0768374	0.0129436	331.54	3607.9	702.874	34.08	brown
AT1G05080	0.58855	0.00175248	0.711135	9.44094	0.423485	1	13627454	56.521	3.69403e-08	1.67e-09	14559	51	0	0.00689064	590.486	NA	NA	NA	NA
AT1G05085	0.616667	0.00337229	NA	1.30864	0.408	1	13625557	60.2236	3.70547e-08	1.67e-09	14808	539	0	0.000502593	426.219	NA	NA	NA	NA
AT1G05087	NA	4.65e-05	NA	NA	0.453634	2	13623437	55.0146	3.70547e-08	1.67e-09	12305	699	0	0.0034561	499.175	NA	NA	NA	NA
AT1G05090	NA	3.89e-05	NA	NA	0.408416	1	13622306	54.5828	3.70547e-08	1.67e-09	10603	1830	0	0.00493252	256.335	1347.2	60.8496	35.6019	yellow
AT1G05100	0.602333	0.000837064	0.292257	48.5567	0.510784	1	13617004	51.9804	3.70547e-08	1.65e-09	5597	293	0	0.000454699	583.062	1820.58	56.4419	97.634	brown
AT1G05120	0.7346	0.00111899	0.360392	NA	0.428354	2	13615222	55.9486	3.71273e-08	1.65e-09	189	2075	0	0.0378209	18.2304	4072.77	656.047	20.7244	blue
AT1G05135	NA	NA	NA	NA	NA	NA	NA	NA	NA	NA	NA	NA	NA	NA	NA	2281.39	2149.89	71.4039	turquoise
AT1G05136	NA	0.000316343	NA	NA	0.446809	1	13607622	61	3.71079e-08	1.66e-09	468	3314	0	7.83e-05	1410.67	NA	NA	NA	NA
AT1G05140	0.755727	0.00211898	0.26546	9.42585	0.42911	1	13603999	52.7321	3.71027e-08	1.65e-09	4091	0	0.0871863	0.0131727	187.009	3596.15	1796.55	25.8603	salmon
AT1G05150	0.746846	0.00389148	0.0628311	0.149027	0.442934	1	13602478	51.5465	3.71027e-08	1.65e-09	5612	1390	0	0.0669248	23.6804	2752.09	1216.9	17.7313	green
AT1G05160	0.916556	0.00621872	0.140103	NA	0.433809	2	13599167	57.6755	3.72398e-08	1.64e-09	8923	4701	0	0.0366471	27.9749	2667.07	357.364	20.1551	blue
AT1G05170	0.704833	0.00512556	0.152571	NA	0.437092	2	13595571	52.9639	3.71903e-08	1.64e-09	7575	8297	0	0.00777239	88.1005	3276.06	532.237	41.2853	pink
AT1G05180	0.782941	0.00103225	0.15925	NA	0.428835	3	13588431	56.2226	3.72918e-08	1.63e-09	0	1917	0	0.0323952	23.8152	2736.49	1058.51	17.2733	blue
AT1G05190	0.666167	0.00270287	0.0333839	NA	0.474545	1	13584294	57.1921	3.72065e-08	1.63e-09	0	17	0	0.0013433	250.275	3891.78	13701.8	31.6794	black
AT1G05200	0.791788	0.00302222	0.144626	NA	0.444792	7	13581604	56.4566	3.7235e-08	1.63e-09	2634	21	0	0.0514194	34.6985	1628.69	895.591	53.5479	pink
AT1G05205	NA	0.00104256	0.0833235	NA	0.503623	1	13577442	56.627	3.72593e-08	1.63e-09	6796	4183	0	0.00382839	118.439	2501.7	435.586	21.5857	lightgreen
AT1G05210	1	0.00118327	0.132598	NA	0.473373	1	13576141	54.0674	3.70352e-08	1.63e-09	7182	5484	0	0.000280739	443.129	2869.73	123.55	37.481	green
AT1G05220	0.0948	0.001537	0.103113	NA	0.449275	1	13574650	53.295	3.71772e-08	1.63e-09	6023	6975	0	0.000261597	440.314	1861.15	11.5984	68.4784	turquoise
AT1G05230	0.817731	0.00226332	NA	NA	0.45891	12	13573649	54.5673	3.71772e-08	1.63e-09	0	7976	0	0.00890803	68.6502	2779.66	750.938	21.0807	brown
AT1G05240	NA	0.00236567	NA	NA	0.486708	1	13566267	53.1741	3.71797e-08	1.63e-09	0	15358	0	0.1559	68.9789	NA	NA	NA	NA
AT1G05250	NA	NA	0.637436	NA	0.486708	1	13560944	53.1741	3.73418e-08	1.63e-09	2630	20681	0	0.000491642	1503.33	NA	NA	NA	NA
AT1G05260	0.5758	0.00317728	0.123331	0.96784	0.457696	1	13556778	57.3308	3.75391e-08	1.63e-09	6796	24847	0	0.000525839	299.467	2295.94	133.29	172.354	turquoise
AT1G05270	0.622167	0.0018418	0.104732	0.4048	0.455197	1	13554904	57.2713	3.76849e-08	1.63e-09	8670	24534	0	0.0286651	28.4085	1561.15	872.922	12.5478	turquoise
AT1G05280	0.486875	0.00122577	0.243094	NA	0.452575	2	13551715	57.8125	3.77281e-08	1.63e-09	11859	21699	0	0.00181149	404.269	3153.78	8.77829	125.947	turquoise
AT1G05290	0.37725	0.00256655	0.527499	2.3264	0.381982	1	13547393	57.8504	3.78144e-08	1.63e-09	16181	18739	0	0.0108649	230.066	NA	NA	NA	NA
AT1G05291	0.787667	0.00137249	0.762149	0.159333	0.43252	1	13545197	59.1272	3.78144e-08	1.63e-09	18377	16869	0	0.000777385	927.82	NA	NA	NA	NA
AT1G05300	0.72356	0.00237493	0.159389	NA	0.486611	2	13541618	55.2053	3.82015e-08	1.63e-09	21956	11452	0	0.000717958	861.562	2553.24	208.535	62.8558	blue
AT1G05310	0.5672	0.00138613	0.106005	NA	0.44247	1	13536042	59.0839	3.92726e-08	1.63e-09	20715	6714	0	0.000613631	257.481	1340.18	118.504	45.606	blue
AT1G05320	0.46887	0.00234926	NA	NA	0.39233	9	13532977	50.8145	3.94715e-08	1.63e-09	15454	1453	0	0.00477023	82.8724	2351.53	870.098	31.3996	cyan
AT1G05330	0.5	0.00123273	0.999506	10.5158	0.437198	1	13528487	55.5852	3.90296e-08	1.63e-09	14557	556	0	0.000322263	738.19	NA	NA	NA	NA
AT1G05340	NA	0.00283605	NA	NA	0.525114	1	13527767	53.0885	3.87748e-08	1.63e-09	13385	0	0.213158	0.000355581	501.244	2393.89	184.042	126.566	turquoise
AT1G05350	0.8147	0.0098163	0.0596792	0.246109	0.449846	1	13525867	55.5409	3.87748e-08	1.62e-09	8893	0	0.0924437	0.0195713	52.3646	2351.61	742.653	19.1897	magenta
AT1G05360	0.668	0.0077879	0.113425	NA	0.418865	3	13522054	56.1759	3.86791e-08	1.62e-09	5794	0	0.0497018	0.0280694	25.1528	2727.28	342.302	21.7982	turquoise
AT1G05370	0.580091	0.00185642	0.0607506	0.80537	0.4689	1	13517398	53.5232	3.8644e-08	1.62e-09	833	0	0.316581	0.000183717	270.632	1714.32	57.938	36.6636	turquoise
AT1G05380	0.646676	0.00138797	0.399274	NA	0.426397	3	13509723	56.1415	4.0478e-08	1.62e-09	3272	0	0.0193129	0.0420531	16.6559	3554.8	1314.23	17.8874	yellow
AT1G05385	0.390571	0.0018745	0.285373	NA	0.42	2	13503874	51.436	4.11466e-08	1.62e-09	5583	3931	0	0.000158721	469.851	2773.86	503.792	30.4766	salmon
AT1G05400	0.2878	0.00187372	NA	NA	0.488722	2	13502472	53.6538	4.17385e-08	1.62e-09	3922	2270	0	0.00212672	181.17	2627.95	29.7504	51.2428	turquoise
AT1G05410	0.640429	0.00256439	0.404303	NA	0.443503	2	13501174	57.0802	4.14178e-08	1.62e-09	1549	0	0.0429043	0.0496143	22.9166	2455.54	419.864	19.6272	magenta
AT1G05420	0.657063	0.00214793	0.210269	NA	0.51166	2	13496572	57.0016	4.1359e-08	1.62e-09	117	1757	0	0.000291194	403.017	2860.08	29.4078	86.5455	turquoise
AT1G05430	0.597647	0.00389896	0.434192	0.736833	0.44321	1	13492492	50.7633	4.15671e-08	1.62e-09	308	0	0.0689471	0.0048321	132.681	2270.43	791.774	13.0936	black
AT1G05440	0.59013	0.00472443	0.386218	1.08116	0.42978	1	13490538	58.1281	4.14892e-08	1.62e-09	2262	0	0.00723888	0.00277916	168.394	2556.24	29.6	59.5936	green
AT1G05450	0.383833	0.00444047	0.374302	1.05061	0.475728	2	13486669	60.1755	4.16876e-08	1.6e-09	6131	3856	0	0.000776763	306.228	1804.82	4.47132	176.683	turquoise
AT1G05460	0.6805	0.00227916	NA	NA	0.435693	2	13485397	53.6062	4.17412e-08	1.6e-09	7403	5128	0	0.0418099	19.9429	2295.61	390.428	17.2708	cyan
AT1G05470	0.6028	0.00156704	0.0439	NA	0.448759	2	13479343	52.8828	4.16871e-08	1.6e-09	1432	11182	0	0.0140602	87.1985	2840.12	382.012	25.5564	green
AT1G05490	0.610606	0.00101991	0.395304	3.64449	0.425939	1	13468041	53.3226	4.01402e-08	1.6e-09	3842	21888	0	0.00695102	73.334	2028.07	20.3426	67.8206	turquoise
AT1G05500	0.8968	0.00104411	0.0753215	4.538	0.441474	2	13461626	56.4937	3.90794e-08	1.6e-09	10257	16088	0	0.024872	25.8219	2406.36	1398.58	12.698	greenyellow
AT1G05510	0.858667	0.000492705	0.114999	NA	0.487603	1	13457099	54.8373	3.90696e-08	1.6e-09	14784	14514	0	0.00198743	202.734	2130.56	21.8233	256.85	darkgrey
AT1G05520	0.710846	0.00111249	0.14193	0.335126	0.45068	1	13455696	56.3095	3.90696e-08	1.6e-09	16187	9359	0	0.0314882	21.2109	3997.83	1289.79	20.3705	yellow
AT1G05530	0.641	0.0019533	0.350737	1.43029	0.459064	1	13450296	58.0249	3.92986e-08	1.6e-09	21587	7463	0	0.000456923	269.982	2678.83	10.6713	107.837	turquoise
AT1G05540	0.4925	0.00101826	0.383801	NA	0.459239	2	13447322	54.8068	3.87913e-08	1.6e-09	24561	4498	0	0.00487571	383.369	3118.12	195.998	59.1099	brown
AT1G05550	0.366393	0.0017663	0.405831	NA	0.468912	4	13445586	58.2456	3.8867e-08	1.61e-09	26297	1460	0	0.000699098	242.847	1975.61	41.9504	138.247	brown
AT1G05560	0.531187	0.00323988	0.33267	NA	0.445513	2	13441245	56.2765	3.86701e-08	1.61e-09	28907	0	0.129213	0.000415935	251.855	2182.84	234.422	57.0972	brown
AT1G05570	0.899606	0.00124678	0.0547355	NA	0.428157	4	13438970	57.2485	3.81749e-08	1.61e-09	16731	0	0.0146216	0.0366586	25.4056	2982.72	2708.92	44.2477	blue
AT1G05575	0.95	0.00160336	0.245797	NA	0.459259	1	13424995	60.0785	3.78812e-08	1.61e-09	14083	89	0	0.000456102	712.222	2496.8	223.656	96.0682	purple
AT1G05577	0.451	0.00148558	0.253383	0.592578	0.452189	1	13424193	56.857	3.78812e-08	1.61e-09	11944	0	0.110405	0.000185905	322.33	1401.38	6.88992	177.697	turquoise
AT1G05580	0.602783	0.0011498	0.233818	NA	0.478111	2	13421189	56.8047	3.78151e-08	1.61e-09	7418	1874	0	0.00177288	289.611	NA	NA	NA	NA
AT1G05590	0.612286	0.00191804	0.28563	NA	0.445783	3	13417195	55.494	3.7744e-08	1.61e-09	4440	5868	0	0.014265	74.9759	1975.02	587.498	18.9183	greenyellow
AT1G05600	0.494167	0.00150761	0.224371	NA	0.419802	3	13414629	55.4819	3.72959e-08	1.61e-09	2419	8434	0	0.026861	34.4682	2109.94	220.729	18.9883	black
AT1G05610	0.773231	0.00181427	0.246966	NA	0.411318	2	13412684	51.2658	3.75064e-08	1.6e-09	265	10379	0	0.00153094	182.901	1987.12	13.2248	52.6537	green
AT1G05615	0.517071	0.00228482	1.76279	7.00318	0.450867	1	13409038	60.229	3.7139e-08	1.6e-09	148	14025	0	0.00162932	609.816	NA	NA	NA	NA
AT1G05620	0.7826	0.00213425	0.132196	NA	0.437564	2	13407664	53.4197	3.70098e-08	1.6e-09	1522	15399	0	0.0097832	87.1914	2856.81	492.408	32.4305	turquoise
AT1G05630	0.721875	0.00101084	0.100929	NA	0.469399	3	13404321	57.9197	3.69954e-08	1.6e-09	4865	17443	0	0.0519762	25.902	3124.68	937.429	43.1972	lightyellow
AT1G05640	0.5715	0.00115568	NA	2.78545	0.440552	1	13399109	54.0836	3.67143e-08	1.6e-09	10077	14851	0	0.0577914	27.6038	2252.45	80.5736	33.822	green
AT1G05650	0.781154	0.00195327	0.18295	1.64734	0.491139	1	13396543	59.4697	3.67143e-08	1.6e-09	12643	12627	0	0.000691616	508.474	1742.38	4.31008	155.511	turquoise
AT1G05660	0.515632	0.00210007	0.325014	1.65827	0.484388	1	13392475	57.9225	3.66012e-08	1.59e-09	9094	8615	0	0.00260671	364.287	2434.18	9.53488	146.186	turquoise
AT1G05670	0.422727	0.00185402	0.192595	NA	0.398023	3	13389004	58.0039	3.64998e-08	1.59e-09	4220	3741	0	0.0293618	27.3725	2550.88	223.575	19.9222	yellow
AT1G05675	0.472875	0.00429656	NA	9.05404	0.43906	1	13385429	59.3194	3.63836e-08	1.59e-09	2536	2057	0	0.00219727	177.162	2673.09	251.716	131.443	purple
AT1G05680	0.544875	0.00500475	0.225524	1.16966	0.449339	1	13383543	57.2076	3.64106e-08	1.59e-09	447	0	0.0179641	0.00419531	136.258	2228.88	325.447	100.806	turquoise
AT1G05690	0.38275	0.002317	0.34409	2.15959	0.430137	1	13379809	51.1065	3.64341e-08	1.59e-09	11	1880	0	0.00547033	101.779	3221.79	209.098	43.9323	pink
AT1G05700	0.590129	0.00140921	NA	NA	0.421569	2	13376872	55.7607	3.65052e-08	1.59e-09	2948	0	0.0618096	0.00856574	81.2721	2091.84	28.2124	163.48	turquoise
AT1G05710	0.57902	0.00531382	NA	NA	0.453488	14	13371727	53.9694	3.65519e-08	1.6e-09	8093	653	0	0.00107434	226.586	2501.86	273.767	67.9608	turquoise
AT1G05710.	NA	NA	0.177224	NA	NA	NA	NA	NA	NA	NA	NA	NA	NA	NA	NA	NA	NA	NA	NA
AT1G05720	0.746429	0.00404495	NA	NA	0.426829	1	13369156	54.1771	3.65519e-08	1.6e-09	10664	3224	0	0.0251083	33.7768	2402.37	693.039	23.1635	blue
AT1G05730	0.537333	0.0035412	0.168601	NA	0.44	2	13367990	51.8648	3.64804e-08	1.6e-09	11830	4390	0	0.00255268	152.01	1838.23	27.6357	59.3832	magenta
AT1G05740	0.6245	0.00339317	0.568862	1.37997	0.43379	1	13365952	54.5951	3.64804e-08	1.6e-09	13868	6428	0	0.00436705	245.837	NA	NA	NA	NA
AT1G05750	0.552333	0.00385331	0.300107	NA	0.441118	2	13365036	57.5072	3.64609e-08	1.6e-09	14210	7344	0	0.0419113	32.2936	2413.77	163.31	21.8202	darkturquoise
AT1G05760	0.612714	NA	NA	NA	0.428811	2	13362811	58.1204	3.65486e-08	1.6e-09	14410	9569	0	NA	NA	NA	NA	NA	NA
AT1G05770	0.4656	0.0042771	NA	12.5466	0.436036	1	13361157	58.2346	3.65486e-08	1.6e-09	12623	11223	0	0.00122029	383.593	1372.05	24.7302	65.4102	black
AT1G05780	0.513667	0.00513443	0.202726	NA	0.426791	1	13359987	52.2147	3.65787e-08	1.6e-09	10424	12393	0	0.0430759	172.079	1230.68	83.6961	62.3854	blue
AT1G05783	NA	0.00371861	NA	NA	0.397436	1	13357887	57.6934	3.65787e-08	1.59e-09	9155	14493	0	0.311914	24.4171	NA	NA	NA	NA
AT1G05785	NA	0.00204392	NA	NA	0.415709	7	13356303	57.146	3.65787e-08	1.59e-09	6287	11870	0	0.0123241	68.9705	2061.06	195.636	23.8547	lightgreen
AT1G05790	0.438545	0.000892199	0.231975	NA	0.443061	4	13353743	56.19	3.66656e-08	1.59e-09	1361	6944	0	0.0389673	22.2203	2840.61	786.553	15.3069	yellow
AT1G05800	0.64365	0.00312763	0.287308	1.01538	0.451977	1	13345341	53.9776	3.66979e-08	1.59e-09	1999	1908	0	0.00811529	142.476	NA	NA	NA	NA
AT1G05805	0.8	0.00228829	0.141525	0.307149	0.487603	1	13342101	56.6189	3.69152e-08	1.59e-09	5239	0	0.281677	0.000294053	422.581	3239.3	1549.29	37.1803	cyan
AT1G05810	NA	0.000352321	0.0400061	NA	0.489308	2	13338286	53.595	3.69374e-08	1.59e-09	9054	2179	0	0.000538969	349.274	2478.94	375.66	27.1271	black
AT1G05820	0.565968	0.00495461	0.220833	NA	0.435133	4	13337067	60.1805	3.69374e-08	1.59e-09	10273	3398	0	0.00540176	84.9567	1552.92	89.2992	37.9165	black
AT1G05830	0.542524	0.00151902	0.228326	NA	0.439422	4	13332415	54.6977	3.70106e-08	1.58e-09	14925	6756	0	0.0606834	13.2183	2403.05	1185.01	21.7992	yellow
AT1G05835	0.923	0.00195596	NA	1.02392	0.483704	1	13324400	52.9585	3.70106e-08	1.58e-09	22940	5851	0	0.000997813	412.453	2113.53	112.309	88.3207	green
AT1G05840	0.82225	0.0011115	0.109846	0.418848	0.427298	1	13323811	56.6964	3.70106e-08	1.58e-09	23529	2382	0	0.0153975	34.4726	2478.48	969.89	20.2583	lightcyan
AT1G05850	0.915	0.00198113	0.087671	NA	0.482402	2	13320042	52.6087	3.69918e-08	1.58e-09	22905	0	0.0740899	0.0249083	35.3706	3534.22	20085.4	28.1653	greenyellow
AT1G05860	0.657538	0.0016232	0.155753	NA	0.442904	3	13317559	53.1913	3.72242e-08	1.58e-09	20456	0	0.0347675	0.00448277	112.17	2523.72	384.589	16.1629	greenyellow
AT1G05870	0.7678	0.00422329	NA	NA	0.485965	12	13315160	53.9648	3.7258e-08	1.58e-09	18357	0	0.0254873	0.000797065	248.157	2730.79	829.671	36.8512	pink
AT1G05870.	NA	NA	0.636626	NA	NA	NA	NA	NA	NA	NA	NA	NA	NA	NA	NA	NA	NA	NA	NA
AT1G05880	0.505713	0.00320589	0.708349	NA	0.426559	3	13310902	58.2663	3.73789e-08	1.58e-09	13189	1063	0	0.0042592	134.189	1138.05	16.2853	396.393	red
AT1G05890	0.675286	0.000653943	0.581292	NA	0.435854	2	13307289	54.9273	3.74463e-08	1.58e-09	7067	4676	0	0.0344032	19.8608	3272.91	2547.72	19.1387	lightcyan
AT1G05894	0.274833	0.000427151	0.332834	NA	0.405386	1	13301809	54.0988	3.74831e-08	1.58e-09	5416	10156	0	0.0223223	42.7156	1604.73	15.3829	48.5891	pink
AT1G05900	0.121	0.000382087	0.450899	NA	0.432386	2	13299696	56.5629	3.76598e-08	1.58e-09	2005	12269	0	0.0275181	30.2739	3156.13	580.521	30.0634	brown
AT1G05910	0.924167	0.000429072	0.234297	0.285551	0.453895	1	13296329	53.7427	3.75926e-08	1.58e-09	0	10883	0	0.0614903	13.2298	3354.64	1013.43	16.765	yellow
AT1G05920	0.624188	0.00128986	0.526894	4.03366	0.440928	1	13289767	53.6483	3.74428e-08	1.58e-09	4864	9344	0	0.00273215	167.156	NA	NA	NA	NA
AT1G05930	0.40352	0.00183567	0.883932	8.04598	0.45768	1	13287127	53.0965	3.72678e-08	1.58e-09	7504	6665	0	0.00300957	170.688	NA	NA	NA	NA
AT1G05940	0.7427	0.000763289	0.176184	NA	0.472515	4	13285435	55.513	3.71485e-08	1.58e-09	9196	3598	0	0.0175983	42.663	2866.72	1417.39	19.2189	midnightblue
AT1G05950	0.618769	0.00079295	NA	NA	0.424628	5	13282144	55.8951	3.67293e-08	1.58e-09	12487	0	0.0223242	0.0252713	38.8639	1921.23	117.691	47.9172	green
AT1G05960	0.441875	0.000608745	0.251007	NA	0.418327	4	13278585	58.2044	3.63696e-08	1.58e-09	16046	0	0.0157708	0.0344357	24.5356	3522.89	1873.69	18.3086	yellow
AT1G05970	0.346667	0.00119467	0.247556	NA	0.472637	2	13270720	51.9017	3.63696e-08	1.58e-09	23318	0	0.0350529	0.000763243	301.836	2370.18	192.16	26.1625	tan
AT1G05990	0.1035	0.000478125	0.0691171	NA	0.448124	1	13268153	50.7363	3.63747e-08	1.58e-09	21470	933	0	0.0047938	474.525	NA	NA	NA	NA
AT1G06000	0.857571	0.00182351	0.2095	0.162632	0.506881	1	13266237	51.4395	3.63747e-08	1.58e-09	18760	0	0.0434783	0.00021354	314.366	2892.15	481.84	60.0196	royalblue
AT1G06010	0.1125	0.00245793	0.407411	0.991884	0.451477	1	13263962	58.8987	3.64986e-08	1.58e-09	16418	0	0.0151149	0.00748695	177.838	2208.3	244.797	22.9368	lightgreen
AT1G06020	1	0.0014164	0.0700213	0.145988	0.481696	1	13262295	53.6809	3.65613e-08	1.58e-09	14491	1643	0	0.00106225	226.504	NA	NA	NA	NA
AT1G06030	0.607286	0.00124982	0.0805267	4.10532	0.475758	1	13259742	52.5803	3.65613e-08	1.58e-09	12375	1476	0	0.000637253	277.437	NA	NA	NA	NA
AT1G06040	0.754667	0.00124407	0.16757	NA	0.457831	2	13258205	51.6852	3.65613e-08	1.58e-09	10671	0	0.206813	0.000320614	323.528	3623.51	7459.89	38.2471	pink
AT1G06045	NA	NA	NA	NA	0.47191	1	13257023	52.8552	3.65613e-08	1.58e-09	10789	0	0.988372	NA	NA	NA	NA	NA	NA
AT1G06050	0.634	0.00176566	0.159563	0.871883	0.442675	1	13256074	55.7055	3.63968e-08	1.58e-09	8099	66	0	0.0052519	123.264	3179.13	223.93	25.0806	brown
AT1G06060	0.672667	0.00086561	0.195332	NA	0.419003	2	13253604	56.6985	3.63945e-08	1.58e-09	5793	2536	0	0.00821592	69.7348	2591.86	676.234	15.0546	greenyellow
AT1G06070	0.651	0.00106716	0.130455	2.24263	0.455975	1	13251716	53.5181	3.63472e-08	1.58e-09	2896	0	0.0610921	0.0200761	51.516	2845.22	621.509	16.6831	midnightblue
AT1G06080	0.4745	0.00122079	0.0700392	NA	0.462963	2	13243082	57.8706	3.64011e-08	1.58e-09	2414	5133	0	0.00143489	505.439	2108.86	339.912	231.267	cyan
AT1G06090	0.551375	0.00175446	0.173505	12.4616	0.474444	1	13239844	56.536	3.64128e-08	1.58e-09	1093	8371	0	0.0118729	212.07	3212.42	90.6558	82.2357	turquoise
AT1G06100	0.655143	0.00149093	0.667034	1.05942	0.448889	1	13235073	57.0195	3.64863e-08	1.58e-09	203	8029	0	0.0138759	250.093	2139.43	32.107	130.498	green
AT1G06110	0.5834	0.00280731	0.203408	NA	0.456903	3	13233486	56.4465	3.65195e-08	1.58e-09	1790	5670	0	0.0251479	46.7376	2582.63	1181.06	21.9278	lightcyan
AT1G06120	0.604	0.000927633	NA	1.91847	0.466667	1	13230635	56.9692	3.65195e-08	1.58e-09	4641	3330	0	0.00904537	357.785	2534.31	7.8155	102.277	turquoise
AT1G06130	0.5625	0.00107147	0.151419	NA	0.442771	2	13228788	57.2248	3.6704e-08	1.58e-09	6488	110	0	0.0185331	46.7639	2689.25	1164.25	18.617	pink
AT1G06135	NA	0.000403993	NA	NA	0.485714	1	13224361	55.3596	3.67988e-08	1.58e-09	10915	1036	0	0.000382904	512.957	NA	NA	NA	NA
AT1G06137	0.705	0.00206446	NA	NA	0.502415	1	13223120	61	3.66674e-08	1.58e-09	12156	2277	0	0.00275923	378.991	NA	NA	NA	NA
AT1G06140	0.546	0.00115502	0.274202	15.8131	0.424568	1	13221771	58.1243	3.70266e-08	1.58e-09	9439	3626	0	0.0431733	21.3075	1680.05	29.6775	34.7503	darkturquoise
AT1G06143	NA	0.000427885	NA	1.7161	0.429066	1	13219508	59.2757	3.71386e-08	1.58e-09	7533	5889	0	0.0205595	55.2713	NA	NA	NA	NA
AT1G06148	0.428571	0.00194453	NA	NA	0.424603	2	13211660	51.0609	3.70343e-08	1.57e-09	0	0	0.0312384	0.215887	27.5141	1254.2	4.20155	88.0799	brown
AT1G06150	0.572065	0.00123431	0.331913	NA	0.431479	2	13217556	56.6548	3.73582e-08	1.58e-09	2708	3760	0	0.0331794	19.6964	1965.65	109.616	22.3601	blue
AT1G06160	0.5188	0.00286786	0.238709	61.8786	0.45034	1	13203638	53.82	3.69551e-08	1.57e-09	6399	6	0	0.00617451	351.12	2101.99	155.769	95.4012	red
AT1G06170	0.487467	0.00348384	0.163985	NA	0.435471	2	13201564	56.958	3.71457e-08	1.57e-09	8473	995	0	0.00459727	171.742	1052.67	7.77984	74.1627	green
AT1G06180	0.583545	0.00251918	0.436253	14.8469	0.417004	1	13197183	58.9215	3.74734e-08	1.57e-09	8243	688	0	0.000163004	424.476	2582.3	88.7519	58.0231	turquoise
AT1G06190	0.557929	0.00180852	NA	NA	0.431276	5	13194314	55.4431	3.75004e-08	1.57e-09	5325	0	0.0218941	0.00907015	90.6479	3278.09	2023.93	21.8627	black
AT1G06200	0.51675	0.00283721	0.171376	NA	0.452186	2	13192256	61	3.74415e-08	1.57e-09	2492	0	0.0821468	0.00267102	115.508	2445.51	1233.25	18.4246	blue
AT1G06210	0.595107	0.00262462	0.110172	NA	0.436632	2	13189416	52.7756	3.74415e-08	1.57e-09	282	0	0.0184922	0.0206143	54.3223	2397.69	759.451	22.3476	pink
AT1G06220	0.6322	0.00221046	0.0754766	NA	0.446356	3	13186594	55.9947	3.69334e-08	1.57e-09	184	0	0.0200121	0.0270385	32.2036	3066.19	1852.35	13.8091	yellow
AT1G06225	0.785	0.00265401	0.229124	3.46825	0.460317	1	13180627	61	3.65386e-08	1.57e-09	6151	5869	0	0.00143115	1211.47	NA	NA	NA	NA
AT1G06230	0.382833	0.00096946	0.235506	NA	0.440243	4	13179582	51.6918	3.65611e-08	1.57e-09	7196	6914	0	0.0200946	24.8065	2787.57	2015.68	13.6928	yellow
AT1G06240	0.569125	0.000947199	0.178532	1.97805	0.478299	1	13175450	50.483	3.651e-08	1.56e-09	11328	8720	0	0.0346819	26.894	3172.39	451.761	23.9586	brown
AT1G06250	0.73075	0.000795873	0.248953	NA	0.448899	2	13173370	57.0359	3.64521e-08	1.56e-09	13408	7120	0	0.0507603	52.2949	2222.75	76.8372	34.6119	brown
AT1G06260	0.521571	0.00125749	0.241652	0.701627	0.455426	1	13170115	59.0659	3.64994e-08	1.56e-09	16663	4430	0	0.0480765	65.6828	NA	NA	NA	NA
AT1G06265	NA	NA	NA	NA	NA	NA	NA	NA	NA	NA	NA	NA	NA	NA	NA	1723.71	58.862	58.2231	blue
AT1G06270	0.356	0.001501	0.142849	NA	0.443798	1	13168554	55.1043	3.64523e-08	1.56e-09	17750	2255	0	0.0201984	57.5164	3152.34	94.4047	28.2882	midnightblue
AT1G06280	NA	0.000146169	0.102099	NA	0.426731	1	13166238	56.5195	3.61804e-08	1.56e-09	16561	1066	0	0.00103293	318.918	NA	NA	NA	NA
AT1G06290	0.762278	0.00198537	0.0942508	0.755402	0.449211	1	13164337	56.8183	3.63414e-08	1.56e-09	11232	0	0.0142471	0.0142348	44.3102	2241.48	2315.06	19.8776	yellow
AT1G06310	0.355357	0.00190686	0.17534	3.50077	0.440335	1	13159893	55.1333	3.62174e-08	1.56e-09	7113	4387	0	0.00198635	143.572	1554.32	6.52093	145.915	turquoise
AT1G06320	0.496333	0.00166502	0.38992	1.86492	0.416667	1	13156022	48.6094	3.61777e-08	1.56e-09	6061	8258	0	0.00021019	570.232	1723.05	2.11783	122.338	turquoise
AT1G06330	0.619111	0.00215231	0.0568495	0.157766	0.487859	1	13155316	47.765	3.61703e-08	1.56e-09	5081	8964	0	0.00379057	202.466	NA	NA	NA	NA
AT1G06340	0.353625	0.00213906	0.48855	3.88906	0.488889	1	13153261	54.5407	3.61703e-08	1.56e-09	3407	11019	0	0.000419158	480.711	NA	NA	NA	NA
AT1G06350	0.69625	0.00145271	0.371131	NA	0.456257	1	13151318	56.4668	3.625e-08	1.56e-09	669	12962	0	0.00775795	301.27	2137.41	60.5101	102.896	green
AT1G06360	0.517	0.00242818	0.176778	NA	0.448312	2	13147683	59.0807	3.60242e-08	1.56e-09	184	13004	0	0.00627916	411.831	2437.8	1326.87	62.1623	darkorange
AT1G06370	NA	NA	NA	NA	NA	NA	NA	NA	NA	NA	NA	NA	NA	NA	NA	2069.89	183.609	22.4367	black
AT1G06380	0.4224	0.00189561	0.354361	0.527138	0.448366	1	13141552	52.1218	3.60242e-08	1.56e-09	6315	7197	0	0.000143637	412.677	2017.07	240.321	25.0367	magenta
AT1G06390	0.74	0.00189054	0.0697662	NA	0.445261	2	13139799	57.0333	3.60104e-08	1.56e-09	8068	2640	0	0.0347999	31.9233	2071.77	2031.78	14.62	turquoise
AT1G06400	NA	0.00110636	0.0784295	NA	0.465438	1	13135949	52.8165	3.60104e-08	1.56e-09	11918	620	0	0.0244648	51.9506	2846.75	1953.28	23.8821	brown
AT1G06410	0.7955	0.0013058	0.0439184	NA	0.437402	3	13131871	56.7578	3.59553e-08	1.56e-09	15930	0	0.0121631	0.0712044	15.4402	2261.62	5189.19	20.3637	darkred
AT1G06420	0.3236	0.000858759	NA	NA	0.418919	2	13127667	51.2732	3.59269e-08	1.56e-09	14769	4139	0	0.000568139	406.828	2478.39	25.7953	70.9321	green
AT1G06430	0.593143	0.000863725	0.0804226	NA	0.458698	3	13126514	52.2862	3.59269e-08	1.56e-09	11607	5292	0	0.0346821	32.9123	3510.01	5467.3	49.5518	brown
AT1G06440	0.590471	0.00266689	0.186535	1.91929	0.45098	1	13123244	54.1075	3.58192e-08	1.56e-09	9587	8562	0	0.00358719	141.881	2511.05	55.9643	38.1766	blue
AT1G06450	0.742333	0.00225698	0.0920418	0.750878	0.473684	1	13120705	52.9477	3.58561e-08	1.56e-09	7577	7208	0	0.000180206	372.28	2431.57	122.15	44.9667	blue
AT1G06460	0.520765	0.00255387	0.333337	1.39622	0.454545	1	13119458	56.1277	3.58561e-08	1.56e-09	5140	4771	0	0.0262165	65.7136	3024.74	4456.2	55.9967	blue
AT1G06470	0.828556	0.00111695	0.194014	NA	0.409639	4	13116887	54.807	3.58203e-08	1.55e-09	270	0	0.0205381	0.0150151	31.4014	2835.48	864.053	18.568	blue
AT1G06475	1	NA	0.102727	NA	0.457447	1	13112711	41.8867	3.57458e-08	1.55e-09	389	20	0	NA	NA	2626.91	44.5349	85.9059	darkred
AT1G06490	0.837909	0.000843401	0.150672	NA	0.421644	2	13108167	59.099	3.57035e-08	1.55e-09	1020	3776	0	0.0472564	22.049	2717.85	165.465	30.6118	darkgreen
AT1G06500	0.5396	0.00134672	0.192971	NA	0.452555	4	13097066	58.0035	3.54731e-08	1.55e-09	11314	10059	0	0.0264214	37.1396	2304.89	255.239	27.216	black
AT1G06510	0.61075	0.000959165	0.384456	9.23703	0.431655	1	13094316	53.7065	3.54731e-08	1.55e-09	8203	6948	0	0.00356465	149.575	3323.06	613.462	19.8585	black
AT1G06515	1	0.00173331	0.0995168	NA	0.415205	2	13095911	49.9746	3.54731e-08	1.55e-09	9816	8561	0	0.00650664	111.313	2564.81	468.673	20.4141	black
AT1G06520	0.666	0.000708601	0.272392	0.876182	0.435722	1	13092642	51.7769	3.5479e-08	1.55e-09	5689	4434	0	0.00607286	96.2771	1772.42	68.8992	61.7335	pink
AT1G06530	0.51575	0.00235015	NA	NA	0.484568	1	13085163	50.8466	3.54758e-08	1.54e-09	0	0	0.0999296	0.000510785	339.673	2538	1397.31	23.2454	grey60
AT1G06540	0.9	0.00466911	0.185933	0.343437	0.492063	1	13085139	56.9751	3.54758e-08	1.54e-09	0	0	0.0695737	0.0045488	218.612	1933.8	11.2388	76.5956	brown
AT1G06550	0.694	0.00360628	0.240738	1.73039	0.437285	1	13082918	59.0928	3.54758e-08	1.54e-09	1386	46	0	0.0194062	53.1426	2925.95	1177.79	27.9913	turquoise
AT1G06560	0.593632	0.001969	0.378781	1.03302	0.453889	1	13078930	56.3173	3.53619e-08	1.54e-09	5374	0	0.0100182	0.0405974	22.0266	2370.98	362.603	18.9299	magenta
AT1G06570	0.67095	0.001783	0.0936411	NA	0.492526	2	13074660	59.3855	3.53228e-08	1.54e-09	9644	0	0.0337146	0.0105723	76.4611	2926.3	2102.58	49.0189	pink
AT1G06580	0.5138	0.00268336	NA	2.68307	0.40519	3	13072549	58.2777	3.5318e-08	1.54e-09	11755	181	0	0.0247279	37.4383	1719.88	94.4822	20.9976	brown
AT1G06590	0.623	0.00242704	0.226769	1.53219	0.434751	1	13070239	58.3301	3.54831e-08	1.54e-09	5003	0	0.00142113	0.0452933	14.5315	2912.07	289.704	22.7681	turquoise
AT1G06620	0.781033	0.00506003	0.151357	NA	0.467213	2	13061001	57.8383	3.55012e-08	1.54e-09	2339	756	0	0.000561436	287.729	2636.39	718.006	72.0199	steelblue
AT1G06630	0.653773	0.00286962	NA	NA	0.435844	9	13058939	57.8263	3.5435e-08	1.54e-09	0	2818	0	0.0426772	134.535	1636.77	592.012	38.1737	blue
AT1G06640	0.582969	0.00420276	0.309909	NA	0.463964	3	13054919	58.2054	3.5435e-08	1.54e-09	911	1413	0	0.00194564	197.792	2002.16	1790.7	72.5141	brown
AT1G06645	0.634033	0.00440601	NA	1.58619	0.44386	1	13052389	52.3251	3.5435e-08	1.54e-09	3441	0	0.244458	0.000357427	330.218	2031.48	878.287	27.6159	brown
AT1G06650	0.482714	0.000678763	0.398668	NA	0.448649	2	13050827	57.0489	3.5435e-08	1.54e-09	5003	0	0.247423	0.00330005	179.419	4004.68	2058.76	27.421	greenyellow
AT1G06660	0.56	0.00174685	0.187693	5.0306	0.444675	1	13049234	57.576	3.5435e-08	1.54e-09	6596	1486	0	0.00627852	66.519	2792.85	46.1674	52.7871	green
AT1G06670	0.648053	0.00203389	0.541004	NA	0.435637	2	13046135	55.8352	3.53344e-08	1.54e-09	7658	0	0.0445763	0.0682609	10.1878	3401.54	1599.84	14.7808	yellow
AT1G06680	0.832667	0.00181173	0.082763	NA	0.501263	2	13038911	56.0597	3.52833e-08	1.54e-09	5874	0	0.178848	0.00407651	101.437	4101.38	118869	30.8321	greenyellow
AT1G06690	0.753692	0.00387765	0.113712	0.309319	0.472663	1	13037145	52.3406	3.52212e-08	1.54e-09	3143	0	0.0256225	0.0177273	46.4539	2720.14	1456.32	43.2159	brown
AT1G06700	0.549143	0.000884699	0.0472356	NA	0.447514	3	13034175	52.9683	3.5235e-08	1.54e-09	0	70	0	0.018135	38.4865	2065.48	2207.93	27.7834	blue
AT1G06710	0.628333	0.0016672	NA	NA	0.401804	19	13030800	55.9328	3.5235e-08	1.54e-09	316	0	0.0108858	0.021079	21.9163	2771.64	174.011	25.9928	magenta
AT1G06710.	NA	NA	0.189724	NA	NA	NA	NA	NA	NA	NA	NA	NA	NA	NA	NA	NA	NA	NA	NA
AT1G06720	0.6412	0.00125809	0.428952	NA	0.419501	3	13026101	55.6075	3.51914e-08	1.55e-09	3254	4518	0	0.0526769	13.1536	2959.15	860.543	25.5535	magenta
AT1G06730	0.726842	0.00325481	0.228463	1.04157	0.460804	1	13019036	56.2017	3.52315e-08	1.54e-09	282	11583	0	0.0267449	28.1115	1920.44	378.198	13.7388	turquoise
AT1G06740	NA	0.00200609	0.0647863	3.55072	0.442458	1	13015808	56.1985	3.52315e-08	1.54e-09	0	9696	0	0.0509493	28.1545	2249.62	123.14	26.2437	turquoise
AT1G06750	0.672083	0.000802971	0.107632	NA	0.446553	3	13013566	51.8537	3.52315e-08	1.54e-09	0	6565	0	0.00395394	108.197	1126.61	5.34419	69.3723	brown
AT1G06760	0.543833	0.00247232	0.197707	1.96572	0.506667	1	13010041	43.0361	3.525e-08	1.54e-09	2969	5303	0	0.000234348	353.14	3247.49	4369.19	39.667	blue
AT1G06770	0.438786	0.00166907	0.482631	NA	0.43049	3	13007665	53.1467	3.52121e-08	1.54e-09	5345	973	0	0.009595	53.8427	1962.98	306.417	17.4196	tan
AT1G06780	0.549929	0.000805758	0.200721	NA	0.421227	2	13003234	57.2176	3.52643e-08	1.54e-09	9776	0	0.0694336	0.0287863	26.9764	3666.34	513.453	18.4123	yellow
AT1G06790	0.9335	0.000861049	0.177166	NA	0.44065	2	12999363	57.868	3.52624e-08	1.54e-09	13647	0	0.0287908	0.0250912	30.9913	2234.53	211.767	20.5303	lightgreen
AT1G06800	0.5434	0.00104284	0.080238	NA	0.5323	2	12997128	54.3967	3.52674e-08	1.54e-09	15882	0	0.077533	0.000171244	318.921	2259.64	389.797	26.2325	red
AT1G06810	0.449	0.00315304	NA	NA	0.448276	1	12994807	54.8301	3.52674e-08	1.54e-09	18203	1534	0	0.000429604	448.365	NA	NA	NA	NA
AT1G06820	0.639333	0.0014089	0.229698	NA	0.434004	4	12993599	57.5269	3.5283e-08	1.54e-09	19411	2742	0	0.0141499	42.1477	3237.63	1369.06	15.0232	black
AT1G06830	0.43175	0.0013134	0.0196595	3.44392	0.466667	1	12989439	56.0453	3.5283e-08	1.54e-09	23571	6768	0	0.0099902	188.898	2181.38	217.214	54.9252	brown
AT1G06840	0.78525	0.00104516	0.119096	0.83563	0.431167	1	12988798	57.5155	3.52739e-08	1.54e-09	24212	916	0	0.0575013	17.5854	3445.12	911	23.4792	turquoise
AT1G06850	0.602875	0.00190405	0.138451	1.80117	0.480276	2	12981497	56.219	3.52739e-08	1.54e-09	31513	0	0.0152761	0.000361834	546.745	2947.38	368.197	29.6296	turquoise
AT1G06870	0.592941	0.00260815	0.116412	2.14717	0.461957	1	12978033	55.4156	3.52654e-08	1.54e-09	34977	361	0	0.00111764	156.675	3164.17	540.411	20.4299	turquoise
AT1G06890	1	0.000627509	0.0172949	NA	0.443203	4	12975222	59.468	3.53479e-08	1.54e-09	37788	3172	0	0.0164227	39.5216	3804.31	1508.9	20.9346	blue
AT1G06900	0.496421	0.000961341	0.0665807	21.2936	0.422114	1	12971780	56.8171	3.53777e-08	1.53e-09	36350	6614	0	0.0482161	14.1456	3305.35	1330.6	17.7355	turquoise
AT1G06910	0.6052	0.00104992	0.293338	NA	0.419437	1	12965554	54.1008	3.54354e-08	1.53e-09	33294	11847	0	0.0302445	27.2979	1875.74	179.916	16.1368	pink
AT1G06920	0.534429	0.00165422	0.637054	2.5443	0.387131	1	12961869	50.8703	3.54843e-08	1.53e-09	31193	9746	0	0.00134867	261.606	NA	NA	NA	NA
AT1G06923	0.012	0.00107579	0.37893	NA	0.39961	1	12959875	55.3542	3.5513e-08	1.53e-09	29525	8078	0	0.00200321	197.812	2813.15	3.8155	122.527	turquoise
AT1G06925	0.282667	0.00131659	NA	NA	0.468153	1	12958841	58.7991	3.5513e-08	1.53e-09	28484	7037	0	0.00108671	304.777	NA	NA	NA	NA
AT1G06930	0.8435	0.00249619	0.380722	0.732302	0.464706	1	12957702	54.1944	3.5513e-08	1.53e-09	27212	5765	0	0.000433076	359.401	3039.81	5.26047	112.932	turquoise
AT1G06950	0.707423	0.00262752	NA	0.456915	0.454933	1	12956492	56.6325	3.5513e-08	1.53e-09	21392	0	0.00990975	0.0468251	15.9175	3013.34	4584.72	20.808	orange
AT1G06960	0.581545	0.00101786	0.214448	NA	0.430435	6	12950735	57.2962	3.58814e-08	1.53e-09	19257	0	0.043864	0.017992	52.7549	2428.17	410.676	21.2211	black
AT1G06970	0.863474	0.00177168	0.107672	0.498822	0.485944	1	12948674	55.2068	3.58814e-08	1.53e-09	16120	874	0	0.0133371	85.2644	1299.82	3.44186	83.0584	brown
AT1G06980	0.6208	0.000937509	0.225656	8.57721	0.498039	1	12943606	55.1921	3.60061e-08	1.53e-09	13118	690	0	0.000139734	475.105	2443.58	93.414	61.6066	blue
AT1G06990	0.573667	0.00329961	0.188189	2.44175	0.4506	1	12938203	56.6527	3.60104e-08	1.53e-09	6943	2221	0	0.0103065	273.198	NA	NA	NA	NA
AT1G07000	0.7121	0.00166032	0.127326	0.84565	0.485	1	12936387	58.3669	3.60104e-08	1.53e-09	4554	0	0.0708893	0.00245184	206.731	3408.3	1343.75	55.7606	red
AT1G07010	0.357714	0.000539316	0.207249	NA	0.456359	3	12933747	53.2622	3.59788e-08	1.53e-09	1826	0	0.0307443	0.013189	61.4845	3965.46	1856.39	46.2278	pink
AT1G07020	0.7802	0.00260287	0.435182	0.820255	0.484234	1	12931332	56.5686	3.59234e-08	1.53e-09	942	2340	0	0.000235807	389.789	2318.42	337.583	27.2267	green
AT1G07025	0.371	0.00275589	0.504598	6.49142	0.489022	1	12928887	56.276	3.60072e-08	1.53e-09	0	4785	0	0.236505	64.3705	NA	NA	NA	NA
AT1G07030	0.732333	0.00142433	0.0791601	NA	0.492355	1	12928132	55.9817	3.59176e-08	1.53e-09	753	2320	0	0.00559615	81.5264	2897.34	608.611	19.3179	lightgreen
AT1G07040	0.51275	0.00131383	0.14337	0.420639	0.452509	1	12925626	54.617	3.59176e-08	1.53e-09	3259	0	0.101256	0.017776	66.4591	3399.32	1161.96	59.5028	blue
AT1G07050	0.262333	0.00234889	0.366084	NA	0.41541	2	12922970	57.7781	3.59176e-08	1.53e-09	5915	0	0.00829875	0.000301089	392.04	2192.88	369.736	231.315	blue
AT1G07060	0.794	0.00102205	0.4133	NA	0.422062	4	12920197	58.304	3.59956e-08	1.53e-09	8688	2760	0	0.00154665	195.38	NA	NA	NA	NA
AT1G07070	1	0.0013855	NA	NA	0.460177	1	12917984	50.6519	3.58815e-08	1.53e-09	10901	2100	0	0.00109586	302.897	2700.67	314.54	29.3558	tan
AT1G07080	0.478875	0.00104771	0.188234	8.17772	0.472431	1	12916568	57.9076	3.58815e-08	1.53e-09	12317	0	0.0622182	0.00341617	148.935	2494.58	2504.25	19.353	greenyellow
AT1G07090	0.95	0.00164476	0.0514163	0.245266	0.558376	1	12912593	50.4981	3.54515e-08	1.53e-09	13857	0	0.152714	0.000160064	422.707	2463.43	675.935	37.5943	midnightblue
AT1G07110	0.8236	0.00124431	0.156812	0.774862	0.443848	1	12908523	54.6643	3.55541e-08	1.53e-09	4702	0	0.0264096	0.0714666	12.6417	2957.08	4244.49	21.953	greenyellow
AT1G07119	NA	NA	NA	NA	NA	NA	NA	NA	NA	NA	NA	NA	NA	NA	NA	833.131	2.71473	95.2894	blue
AT1G07120	0.672143	0.0008804	0.476424	0.0619769	0.430874	2	12901786	57.0901	3.55541e-08	1.52e-09	2268	468	0	0.0333573	39.5689	1137.46	14.3132	41.3924	turquoise
AT1G07130	0.462833	0.00116568	0.365183	0.556293	0.552795	1	12898769	54.8676	3.55933e-08	1.52e-09	162	0	0.15762	0.000226112	413.172	2241.98	19.8729	53.3043	turquoise
AT1G07135	0.616833	0.00368691	0.589193	34.8753	0.523504	1	12896668	55.4175	3.57003e-08	1.52e-09	375	0	0.0561674	0.000308464	469.134	2215.21	1529.39	153.671	purple
AT1G07140	0.982667	0.00161151	NA	NA	0.468705	1	12894866	48.7646	3.57003e-08	1.52e-09	0	0	0.0282669	0.0030171	157.375	2712.25	3735.27	19.8531	grey60
AT1G07150	0.489086	0.00206833	0.385619	NA	0.478	2	12892604	56.969	3.57003e-08	1.52e-09	1969	15	0	0.000175561	289.728	2127.47	153.014	62.6874	purple
AT1G07160	0.59416	0.00216438	0.247759	0.980282	0.486439	1	12888691	56.3879	3.57874e-08	1.52e-09	0	178	0	0.00213186	227.632	2097.89	14.4155	110.947	red
AT1G07170	0.890111	0.00206459	0.000112671	NA	0.447447	6	12886548	50.3386	3.57874e-08	1.52e-09	413	2321	0	0.00686257	154.64	2598.81	472.175	21.5099	blue
AT1G07175	0.7958	0.00348483	NA	NA	0.44697	2	12884267	58.8198	3.58098e-08	1.52e-09	2694	378	0	0.000309559	401.44	NA	NA	NA	NA
AT1G07180	0.540667	0.00191916	0.0902162	3.65436	0.467058	1	12882441	55.244	3.57644e-08	1.52e-09	4520	0	0.0136849	0.0012194	177.867	4031.39	2474.97	74.3497	brown
AT1G07190	NA	0.00726265	NA	NA	0.448485	1	12878532	56.585	3.5755e-08	1.52e-09	8429	3869	0	0.00122481	519.511	NA	NA	NA	NA
AT1G07200	0.534179	0.00121537	0.217304	8.3203	0.463946	2	12878068	57.0198	3.57246e-08	1.52e-09	8893	0	0.0650636	0.047236	29.1492	2521.68	1193.3	34.5149	pink
AT1G07210	0.452333	0.00128654	0.171206	5.83023	0.436387	1	12871329	56.7913	3.59307e-08	1.52e-09	15632	175	0	0.00128715	193.434	2489.88	748.781	17.1632	magenta
AT1G07220	0.505167	0.00175692	0.232983	3.83761	0.459974	1	12869620	58.0928	3.59028e-08	1.52e-09	14539	1884	0	0.0238704	46.4468	3011.25	566.91	26.2682	red
AT1G07230	0.797677	0.00547139	0.0767537	0.0267854	0.468789	1	12866364	59.3013	3.58412e-08	1.52e-09	11170	1441	0	0.00142745	182.753	2550.16	1478.86	18.1566	blue
AT1G07240	0.345	0.000594177	0.195882	9.67787	0.493416	1	12862920	56.7764	3.58412e-08	1.52e-09	8664	0	0.408421	0.000157794	366.234	3038.12	1391.6	23.3505	blue
AT1G07250	0.466533	0.0015631	0.122368	0.585823	0.500694	1	12860786	55.6595	3.59866e-08	1.52e-09	6580	525	0	0.000158235	328.819	2820.04	1780.65	28.0504	greenyellow
AT1G07260	0.578435	0.00436952	0.198195	4.44139	0.497554	1	12858951	58.7359	3.59866e-08	1.52e-09	4831	2360	0	0.000120048	370.586	3707.28	86.507	50.8846	turquoise
AT1G07270	0.180308	0.00196357	0.294483	NA	0.417655	2	12857101	56.1308	3.60615e-08	1.52e-09	1171	4210	0	0.00134229	139.215	2423.72	24.8109	52.8759	green
AT1G07280	0.716	0.00320029	0.18395	NA	0.453888	4	12848528	55.195	3.61028e-08	1.52e-09	2786	0	0.0272069	0.000185703	289.36	2964.44	4977.88	34.6695	cyan
AT1G07290	NA	0.00113855	0.168006	0.490885	0.431925	1	12844533	58.6374	3.62385e-08	1.52e-09	6781	3843	0	0.0147771	50.9849	3538.58	58.1209	33.47	turquoise
AT1G07300	0.795667	0.00499828	0.0980391	NA	0.417544	3	12840852	54.076	3.6824e-08	1.52e-09	6547	1595	0	0.00158211	270.597	2114.3	94.6729	32.5702	brown
AT1G07310	0.445571	0.00162358	0.132482	NA	0.529745	1	12839433	55.637	3.68302e-08	1.52e-09	4826	0	0.0686486	0.00193078	177.75	2856.08	1342.09	27.1382	midnightblue
AT1G07320	0.772125	0.00551359	0.102671	NA	0.495878	4	12837578	56.0861	3.59631e-08	1.52e-09	3258	0	0.108125	0.000191071	403.459	3692.43	10665.6	27.8633	black
AT1G07330	0.629	0.00993284	0.369307	NA	0.404067	2	12835625	53.5048	3.59631e-08	1.52e-09	0	1785	0	0.00987941	70.4827	1916.25	6.67132	79.7303	brown
AT1G07340	0.453333	0.00202931	0.289352	0.58497	0.45825	1	12831723	48.5233	3.59837e-08	1.52e-09	100	5687	0	0.00385298	137.253	NA	NA	NA	NA
AT1G07350	0.510531	0.00300189	0.297629	NA	0.503046	6	12829161	48.7639	3.59669e-08	1.52e-09	2662	8249	0	0.0479471	27.8768	2661.5	1039.95	55.9315	turquoise
AT1G07360	0.698345	0.00738675	0.150234	0.504447	0.47787	1	12826228	53.5835	3.59504e-08	1.52e-09	5595	11182	0	0.0429534	25.9667	2430.73	1144.45	16.2738	midnightblue
AT1G07370	1	0.00202638	NA	NA	0.464646	1	12823508	51.1307	3.59514e-08	1.52e-09	8315	13902	0	0.00184395	167.412	3111.85	258.633	43.7325	green
AT1G07380	0.571333	0.00132066	0.164854	NA	0.443022	2	12821911	55.0432	3.59629e-08	1.52e-09	9912	13687	0	0.0198521	47.5562	3269.85	483.989	28.758	yellow
AT1G07390	0.54525	0.00142111	0.359824	NA	0.404059	5	12816923	59.744	3.59876e-08	1.52e-09	10765	7907	0	0.0288774	38.0445	2157.31	148.828	54.9722	pink
AT1G07400	0.779111	0.00343986	0.117127	0.298409	0.518987	1	12811619	50.8505	3.61188e-08	1.52e-09	9883	7025	0	0.000212133	411.774	1947.58	42.8527	157.046	turquoise
AT1G07410	1	0.00142899	NA	NA	0.44186	1	12810515	54.782	3.62362e-08	1.52e-09	8142	5284	0	0.000461755	376.407	2464.01	72.645	31.6278	turquoise
AT1G07420	0.802056	0.00246373	0.0644059	NA	0.440699	2	12808990	53.7317	3.62362e-08	1.52e-09	5164	2306	0	0.00324214	108.765	3544.29	851.896	54.2601	blue
AT1G07430	0.735077	0.00130423	0.135008	12.3782	0.48909	1	12805799	55.0885	3.62403e-08	1.52e-09	2838	0	0.0100816	0.00051313	429.274	2359.46	84.8124	133.492	blue
AT1G07440	0.4315	0.000784436	0.206337	NA	0.458177	2	12800360	55.7219	3.64741e-08	1.52e-09	153	3052	0	0.0018874	791.849	3143.13	1367.37	37.9373	cyan
AT1G07450	0.413545	0.00122979	0.27078	4.59183	0.429119	1	12798619	60.1832	3.64773e-08	1.52e-09	1894	4793	0	0.00242765	236.839	2960.74	58.9163	83.6642	salmon
AT1G07460	0.873833	0.000695287	0.139461	NA	0.426213	2	12796586	60.6977	3.66372e-08	1.52e-09	3927	6826	0	0.0105806	141.161	NA	NA	NA	NA
AT1G07470	0.720429	0.00129784	NA	NA	0.461879	2	12795176	55.207	3.64365e-08	1.52e-09	5337	4933	0	0.0385104	26.2439	1839.43	506.239	22.5242	turquoise
AT1G07473	0.432	0.000527179	0.512991	NA	0.492063	1	12791979	53.7978	3.64365e-08	1.52e-09	8534	4002	0	0.000992169	329.359	1797.91	3.81395	89.6897	red
AT1G07476	0.333833	0.000985959	0.760476	NA	0.468124	1	12790992	57.6387	3.64365e-08	1.52e-09	9521	2994	0	0.0308876	67.2657	NA	NA	NA	NA
AT1G07480	0.725	0.00100056	0.144415	NA	0.461606	3	12790522	55.2058	3.64365e-08	1.51e-09	9991	0	0.0144804	0.0352911	30.0462	1691.08	480.16	19.701	turquoise
AT1G07485	0.4965	0.000799226	NA	NA	0.448845	1	12785170	59.194	3.6428e-08	1.51e-09	15343	834	0	6.74e-05	775.077	NA	NA	NA	NA
AT1G07490	0.7465	NA	NA	NA	0.438272	1	12785165	57.9658	3.6428e-08	1.51e-09	15348	839	0	NA	NA	NA	NA	NA	NA
AT1G07500	1	NA	0.314381	NA	0.526104	1	12781779	54.385	3.6428e-08	1.51e-09	18734	66	0	NA	NA	2977.17	28.8574	94.1643	royalblue
AT1G07510	0.483182	0.000794868	0.139376	1.77449	0.461507	1	12782110	57.179	3.65216e-08	1.51e-09	18403	0	0.0472065	0.0478513	25.1955	2928.97	1170.18	18.8827	pink
AT1G07520	0.5568	NA	NA	NA	0.437111	4	12777011	56.8405	3.65926e-08	1.51e-09	22658	4062	0	NA	NA	2616.7	389.355	37.6769	purple
AT1G07530	0.824091	0.000334191	0.199637	0.701825	0.441126	1	12772964	52.9206	3.67449e-08	1.51e-09	18536	8109	0	0.0868369	24.7954	3138.68	1236.55	18.1838	yellow
AT1G07540	0.534379	0.00687501	0.164695	1.38172	0.430005	1	12768402	55.8999	3.67866e-08	1.51e-09	13379	12161	0	0.00251216	141.177	NA	NA	NA	NA
AT1G07550	0.605038	0.00929374	NA	3.47445	0.398844	1	12764002	56.6271	3.73068e-08	1.51e-09	8473	7255	0	0.00192563	175.272	NA	NA	NA	NA
AT1G07560	0.682091	0.0041964	NA	1.79321	0.401376	1	12759230	57.3966	3.7503e-08	1.51e-09	3895	2677	0	0.00504648	71.3779	2092.83	11.7767	187.769	turquoise
AT1G07570	0.7765	0.00118891	0.0770982	NA	0.454976	5	12755409	51.2555	3.77309e-08	1.51e-09	1276	58	0	0.017105	64.4594	2536.82	655.425	44.1681	royalblue
AT1G07590	0.686208	0.00491372	0.111376	1.02559	0.438006	1	12750068	57.9761	3.7736e-08	1.51e-09	982	0	0.0346484	0.0419288	32.5116	2329.83	10448.3	43.9284	brown
AT1G07600	1	NA	NA	NA	0.478261	1	12747641	53.9966	3.78214e-08	1.51e-09	3409	76	0	NA	NA	NA	NA	NA	NA
AT1G07610	1	0.00392623	NA	NA	0.485507	1	12745098	52.4534	3.78424e-08	1.5e-09	5952	1325	0	0.00052611	533.543	2512.3	782.896	77.2037	green
AT1G07615	0.612125	0.00171192	NA	0.682362	0.468961	1	12744347	57.9883	3.82767e-08	1.5e-09	6703	2076	0	0.0745125	24.4797	2545.22	237.11	25.2757	magenta
AT1G07620	0.4354	0.00298423	0.420961	NA	0.404145	4	12742155	54.7653	3.83719e-08	1.5e-09	8895	1099	0	0.0046055	130.575	3247.64	296.969	85.8452	lightyellow
AT1G07630	0.647214	0.00233345	0.0618002	0.290154	0.456511	1	12737630	52.9502	3.84686e-08	1.5e-09	13420	202	0	0.0119786	48.9144	3150.97	1002.07	25.0642	red
AT1G07640	0.519967	0.00313507	0.197662	NA	0.472549	3	12733514	55.5412	3.85712e-08	1.5e-09	17536	4318	0	0.0019893	218.994	2691.5	856.46	30.2778	midnightblue
AT1G07645	0.760857	0.00452055	0.0571228	0.379239	0.52657	1	12719108	57.7888	3.87979e-08	1.5e-09	6544	7	0	0.000275413	436.565	2465.08	11.3907	242.688	darkgrey
AT1G07650	0.795308	0.00175393	0.236586	NA	0.419523	4	12727434	58.9319	3.85912e-08	1.5e-09	8244	0	0.103068	0.0257974	30.3898	2481.03	2762.43	25.8298	lightyellow
AT1G07660	1	0.00255477	NA	NA	0.512821	2	12717712	36.4876	3.87979e-08	1.5e-09	5245	0	0.0952381	0.00012921	730.862	1395.82	549.933	44.948	brown
AT1G07670	0.705682	0.00190855	0.0517381	NA	0.460452	2	12716525	55.7356	3.90874e-08	1.5e-09	373	0	0.0220139	0.0514486	17.6565	3654.16	1521.63	23.1748	turquoise
AT1G07680	0.361667	0.00447148	0.793655	1.96205	0.45098	1	12710533	53.8851	3.90588e-08	1.5e-09	493	980	0	0.00011107	721.834	NA	NA	NA	NA
AT1G07690	0.865	0.00386359	1.21412	NA	0.390205	5	12708569	55.0972	3.94487e-08	1.5e-09	2457	2944	0	0.000440995	319.273	NA	NA	NA	NA
AT1G07700	0.588435	0.00403307	0.34162	NA	0.417431	4	12706950	58.3594	3.94487e-08	1.5e-09	1772	4563	0	0.0118907	82.4685	4346.25	1642.47	33.3344	pink
AT1G07705	0.848143	0.001606	0.30532	NA	0.435772	2	12704990	56.0973	3.9112e-08	1.5e-09	0	6523	0	0.0568148	13.5856	2645.09	733.391	15.8238	yellow
AT1G07710	0.6548	0.00200786	NA	NA	0.46201	2	12700381	57.8319	3.9475e-08	1.5e-09	2844	6704	0	0.0921042	14.6645	1834.22	37.2636	43.8462	turquoise
AT1G07720	0.686083	0.00155113	0.133372	NA	0.446999	2	12696014	56.2962	3.91491e-08	1.49e-09	7211	2426	0	0.00166962	175.254	3479.69	2391.13	40.8514	brown
AT1G07725	0.453917	0.0019419	0.226497	2.44873	0.478355	1	12691744	55.26	4.00168e-08	1.49e-09	11481	0	0.20267	0.01158	106.329	NA	NA	NA	NA
AT1G07730	0.659	NA	NA	NA	0.522222	1	12689018	54.747	4.03478e-08	1.48e-09	14207	1973	0	NA	NA	NA	NA	NA	NA
AT1G07740	0.502222	0.0014374	0.212856	1.51534	0.444928	1	12689103	57.1983	4.03478e-08	1.48e-09	14122	1888	0	0.0418261	36.9213	2548.46	72.6682	26.0296	blue
AT1G07745	0.4262	0.00110725	NA	NA	0.446852	5	12685956	56.8746	4.05724e-08	1.48e-09	12078	0	0.00764656	0.0102313	47.0761	2364.55	234.152	17.0434	black
AT1G07747	0.877167	0.00280187	0.333536	0.583037	0.431718	1	12682987	54.0311	4.14841e-08	1.48e-09	11175	508	0	0.00124409	441.278	NA	NA	NA	NA
AT1G07750	0.877	0.00262924	0.226979	1.81686	0.492997	1	12682553	47.7597	4.05618e-08	1.47e-09	8971	624	0	0.00185867	170.267	2380.43	992.335	32.7102	turquoise
AT1G07770	1	0.00246996	NA	NA	0.450382	3	12679134	50.0973	4.05618e-08	1.47e-09	5229	0	0.0214196	0.00245955	201.505	2446.77	4840.28	23.7137	tan
AT1G07780	1	0.000200189	0.255553	NA	0.440821	13	12676680	53.5255	4.01414e-08	1.47e-09	2243	2342	0	0.06477	251.141	945.395	474.797	92.246	brown
AT1G07790	0.789	0.00178871	0.0422266	0.242692	0.501119	1	12673607	45.5271	3.9719e-08	1.47e-09	1230	5415	0	0.000201784	407.52	1979.6	838.653	32.373	green
AT1G07795	0.6255	0.00141605	0.0254338	NA	0.509804	1	12672402	48.5839	3.9719e-08	1.47e-09	53	6620	0	0.000524996	459.04	2140.76	2.48372	117.502	turquoise
AT1G07810	0.581824	0.00116902	0.0728775	1.13323	0.464532	1	12670367	57.0189	3.87664e-08	1.47e-09	142	1069	0	0.0611835	13.7422	4182.29	1364.27	22.0417	yellow
AT1G07820	NA	0.00170706	NA	NA	0.512821	2	12665456	37.0442	3.87716e-08	1.47e-09	5053	0	0.172802	0.000153888	527.586	3354.99	1247.72	28.2962	blue
AT1G07830	0.416	0.00192804	0.0844659	NA	0.485057	1	12664419	57.5272	3.86521e-08	1.47e-09	6090	0	0.0882002	0.00355991	148.978	2892.13	483.301	22.3005	tan
AT1G07840	0.611944	0.00207391	0.33634	NA	0.43344	3	12662500	58.7083	3.85165e-08	1.46e-09	8009	1772	0	0.0279895	32.2473	2883.2	453.797	18.4649	magenta
AT1G07850	0.528111	0.00178732	0.0674537	4.52654	0.509225	1	12659840	58.5261	3.84298e-08	1.46e-09	10669	2738	0	0.0113346	123.773	NA	NA	NA	NA
AT1G07860	NA	NA	0.117032	NA	0.480392	1	12657634	54.3968	3.84414e-08	1.46e-09	12875	2532	0	NA	NA	NA	NA	NA	NA
AT1G07870	0.668781	0.00218562	0.0580441	NA	0.444651	2	12657772	56.9083	3.81461e-08	1.46e-09	12593	0	0.0388671	0.0106682	87.4171	2618.28	376.707	31.0995	purple
AT1G07880	0.255	0.000880944	0.0919156	NA	0.411172	2	12652649	55.4592	3.75272e-08	1.46e-09	8826	1033	0	0.0148164	75.6153	2469.1	155.485	35.0137	green
AT1G07885	NA	0.00203794	NA	NA	0.424242	2	12650687	61	3.75272e-08	1.46e-09	7823	51	0	0.000321459	385.819	NA	NA	NA	NA
AT1G07890	0.740195	0.00250075	0.0658798	NA	0.498008	8	12649264	47.1342	3.75479e-08	1.46e-09	5019	0	0.107757	0.000591835	231.308	2822.89	15672.2	33.795	purple
AT1G07900	0.63	0.00138522	0.109837	NA	0.443281	1	12643975	56.372	3.71066e-08	1.46e-09	938	0	0.0892099	0.00102831	417.359	2183.79	41.6853	91.0961	purple
AT1G07901	NA	NA	NA	NA	0.431373	1	12642574	61	3.71066e-08	1.46e-09	561	29	0	NA	NA	1313.47	47.2837	43.7748	blue
AT1G07902	NA	0.00231986	NA	3.69629	0.486486	1	12642627	57.9708	3.71267e-08	1.46e-09	0	0	0.0204415	0.000204115	393.917	NA	NA	NA	NA
AT1G07910	0.455739	0.00145264	0.242081	NA	0.432654	2	12641108	56.8904	3.71666e-08	1.45e-09	586	0	0.00988164	0.0484194	15.6525	3270.42	769.729	17.443	blue
AT1G07920	0.196	0.00175278	NA	NA	0.502222	1	12631774	36.2095	3.73734e-08	1.46e-09	3953	58	0	0.00243319	516.882	2428.99	5108.94	24.4981	midnightblue
AT1G07930	NA	0.0014651	0.00256184	NA	0.499259	2	12628361	36.0745	3.72886e-08	1.46e-09	457	30	0	0.00958222	88.5142	2178.32	9554.94	18.5991	magenta
AT1G07940	0.488667	0.00127239	NA	NA	0.498519	4	12623596	36.2902	3.74869e-08	1.46e-09	820	0	0.0435117	0.00146842	243.841	2069.35	4450.11	24.8531	midnightblue
AT1G07950	0.477	0.000662536	0.0849699	NA	0.459459	2	12620816	53.5735	3.74869e-08	1.46e-09	3600	121	0	0.00155589	230.323	1660.91	362.896	22.0841	tan
AT1G07960	0	0.00180763	0.154142	NA	0.408163	4	12619400	52.9534	3.73934e-08	1.46e-09	3330	1537	0	0.00886991	81.5717	2522.96	455.281	18.8055	turquoise
AT1G07970	0.5285	0.000381253	0.240239	2.82916	0.46926	1	12617327	56.2105	3.73934e-08	1.46e-09	0	3610	0	0.0484244	17.8502	1966.64	454.11	17.2956	blue
AT1G07980	0.61125	0.000940717	0.457697	NA	0.47504	2	12613380	53.8188	3.73934e-08	1.46e-09	0	7557	0	0.059258	35.7531	2521.44	431.136	20.3716	grey60
AT1G07985	0.3235	0.000586628	0.0663056	NA	0.45977	1	12611319	48.6589	3.73934e-08	1.46e-09	1805	9618	0	0.000303578	390.114	2299.51	46.186	141.953	turquoise
AT1G07990	0.558172	0.00208451	0.213389	NA	0.432545	2	12609592	58.1413	3.7423e-08	1.46e-09	3532	5549	0	0.057168	15.5895	2944.61	1899.9	14.4221	yellow
AT1G08000	0.597417	0.00211758	NA	NA	0.491909	2	12603305	53.6754	3.67854e-08	1.46e-09	9819	3019	0	0.0183515	55.3761	2316.12	294.957	19.0194	midnightblue
AT1G08005	0.9134	NA	NA	NA	0.452381	1	12601264	61	3.6597e-08	1.46e-09	11860	3021	0	NA	NA	1130.66	2.62791	112.56	turquoise
AT1G08010	0.798429	0.0016544	0.31263	NA	0.47507	3	12600697	51.1673	3.6597e-08	1.46e-09	12427	660	0	0.0385642	29.0885	3154.86	456.653	22.1048	midnightblue
AT1G08030	0.842692	0.00525559	0.227222	NA	0.421823	2	12597136	59.9503	3.65444e-08	1.46e-09	15988	0	0.0022965	0.0293558	26.4072	2550.3	576.406	15.6967	blue
AT1G08035	0.252333	0.00278785	1.1465	NA	0.414	3	12592143	52.2079	3.65444e-08	1.46e-09	18194	908	0	0.00189883	224.013	1405.11	5.19225	99.8683	turquoise
AT1G08040	0.624857	0.000971846	0.188569	NA	0.423847	4	12591236	54.7573	3.65444e-08	1.46e-09	14743	0	0.0289352	0.0216316	31.3778	2283.37	869.479	25.2884	blue
AT1G08050	0.620684	0.00236349	NA	0.194045	0.491173	1	12587751	52.5939	3.65444e-08	1.46e-09	11926	0	0.079627	0.00353618	114.376	2612.7	262.045	60.2646	red
AT1G08060	0.398024	0.00138685	0.771494	NA	0.432851	3	12584841	54.2411	3.64841e-08	1.46e-09	2423	2689	0	0.0576978	10.7233	2866.06	962.437	18.6984	yellow
AT1G08065	0.437875	0.00280548	0.334309	NA	0.40048	1	12574898	57.3883	3.70259e-08	1.46e-09	53	7218	0	0.000739611	400.794	NA	NA	NA	NA
AT1G08070	0.39548	0.00185428	0.174024	NA	0.413747	2	12572395	55.1186	3.70376e-08	1.46e-09	0	4052	0	0.0265893	41.7193	2493.43	45.0186	34.3931	blue
AT1G08080	0.548167	0.00428337	0.26362	0.632755	0.419082	1	12569554	48.3307	3.69357e-08	1.45e-09	2539	2061	0	0.000934309	203.592	NA	NA	NA	NA
AT1G08090	0.809333	0.00149152	0.0869499	NA	0.517891	1	12562522	55.9764	3.62675e-08	1.45e-09	302	2926	0	0.00264116	147.08	1337.95	45.0372	98.1405	blue
AT1G08100	0.874357	0.00176818	0.143199	0.140397	0.508604	1	12559375	57.6236	3.62104e-08	1.45e-09	414	6068	0	0.00321383	149.695	NA	NA	NA	NA
AT1G08110	0.444273	0.00132448	0.188421	NA	0.44774	4	12551294	57.4997	3.59562e-08	1.45e-09	1304	0	0.0514541	0.0350995	35.5343	2402.46	2835.56	20.1628	brown
AT1G08115	NA	NA	NA	NA	NA	NA	NA	NA	NA	NA	NA	NA	NA	NA	NA	980.235	5.35194	272.108	greenyellow
AT1G08120	0.2734	0.00162087	NA	NA	0.412879	1	12547930	57.0535	3.59177e-08	1.45e-09	4668	40	0	0.0185475	78.4858	NA	NA	NA	NA
AT1G08125	0.353444	0.00172779	0.194408	NA	0.447884	4	12546931	59.3609	3.59032e-08	1.45e-09	5667	0	0.0196435	0.0560071	19.3901	2319.23	508.853	18.3576	blue
AT1G08130	0.517947	0.0032149	0.114888	1.75952	0.429836	1	12543882	56.6391	3.59427e-08	1.45e-09	8716	0	0.012869	0.0399655	19.2823	2431.88	750.623	24.0887	green
AT1G08135	0.641182	0.00185525	0.288919	3.40994	0.425763	1	12538049	58.2783	3.60011e-08	1.45e-09	14549	92	0	0.00325795	131.226	NA	NA	NA	NA
AT1G08140	0.6155	0.00137618	0.509168	0.774734	0.430199	1	12534610	56.3644	3.59309e-08	1.45e-09	17988	3531	0	0.00697552	120.318	NA	NA	NA	NA
AT1G08150	0.651944	0.00129482	0.363801	3.79325	0.455474	1	12530354	56.9103	3.59312e-08	1.45e-09	22244	4550	0	0.0022028	158.811	NA	NA	NA	NA
AT1G08160	NA	0.00101	0.103267	0.359309	0.506006	1	12527132	55.4711	3.59312e-08	1.45e-09	25466	3346	0	0.00167198	384.267	2649.31	201.141	36.617	darkgreen
AT1G08165	NA	0.00208849	NA	NA	0.480594	1	12525096	55.0481	3.58448e-08	1.45e-09	24474	1462	0	0.00033985	508.787	1666.59	25.7194	50.6078	greenyellow
AT1G08170	0.546	0.00324801	0.114379	3.64802	0.487705	1	12523776	55.6585	3.58085e-08	1.45e-09	23084	72	0	0.00154167	265.991	NA	NA	NA	NA
AT1G08180	NA	0.00172897	0.294316	NA	0.437037	1	12522184	60.7539	3.58106e-08	1.44e-09	21472	0	0.282881	0.000123204	524.851	2418.7	110.806	39.989	pink
AT1G08190	0.537636	0.00254739	0.0830945	0.281521	0.454978	1	12519125	58.7801	3.58662e-08	1.44e-09	13342	1697	0	0.0345539	27.3501	2648.21	3203.61	16.6524	pink
AT1G08200	0.878667	0.00571831	0.0170538	0.0202005	0.455556	1	12512727	54.0623	3.59135e-08	1.43e-09	9946	8095	0	0.0195493	41.4075	3671.85	7743.3	27.0611	skyblue
AT1G08210	0.672273	0.00436545	0.103768	NA	0.439926	4	12509561	57.9447	3.59639e-08	1.43e-09	6036	7757	0	0.0244028	25.1473	3193.25	476.623	21.9677	midnightblue
AT1G08220	0.618125	0.00220797	0.296001	NA	0.430303	2	12505523	57.8562	3.60427e-08	1.43e-09	3400	5121	0	0.0169235	40.3121	3068.94	168.147	29.5405	magenta
AT1G08230	0.642724	0.00378264	0.16824	NA	0.438791	5	12502951	55.8057	3.60427e-08	1.43e-09	0	1542	0	0.0011208	367.907	2418.58	476.166	46.435	pink
AT1G08250	0.800444	0.000806789	NA	NA	0.517713	1	12497769	55.8089	3.61113e-08	1.43e-09	271	0	0.470556	0.00025259	435.337	2875.17	330.936	42.8533	royalblue
AT1G08260	0.631826	0.000860048	0.140485	NA	0.413198	2	12497691	56.581	3.6049e-08	1.44e-09	349	0	0.0478408	0.0427006	12.9844	2874.84	510.46	30.8111	green
AT1G08270	0.312	0.00149082	NA	NA	0.446115	2	12480276	51.9038	3.61306e-08	1.43e-09	4445	31	0	0.00528527	330.634	1640.86	32.7705	38.6784	turquoise
AT1G08280	0.783034	0.00193417	0.154414	0.669973	0.435255	1	12478668	57.2889	3.61306e-08	1.43e-09	1981	0	0.113126	0.0245272	38.1942	3667.6	187.998	33.8664	turquoise
AT1G08290	0.537286	0.00150085	0.212968	2.66495	0.439842	1	12476549	53.8667	3.61707e-08	1.43e-09	0	1098	0	0.00578257	285.924	2942.24	50.693	62.6648	turquoise
AT1G08300	0.458722	0.00146171	0.460406	NA	0.41544	3	12471771	59.0485	3.61134e-08	1.43e-09	2293	0	0.0498765	0.0312328	43.4958	2176.35	158.302	32.2496	magenta
AT1G08310	0.662813	0.000946319	0.280998	NA	0.415883	3	12467898	58.7151	3.62448e-08	1.43e-09	6166	2075	0	0.0197063	107.673	2929.88	37.4837	124.896	turquoise
AT1G08315	0.566333	0.000240803	NA	NA	0.523517	1	12466210	57.8127	3.65367e-08	1.43e-09	7854	982	0	0.000269064	334.723	2744.61	383.287	25.3196	saddlebrown
AT1G08320	0.978217	0.00171012	NA	NA	0.469571	5	12464685	55.1045	3.6555e-08	1.43e-09	3744	0	0.0632517	0.000676996	234.263	2295.31	63.7488	325.27	turquoise
AT1G08340	0.439	0.000867306	0.12888	0.835937	0.462851	1	12455654	57.4779	3.63584e-08	1.43e-09	0	273	0	0.00426844	91.0774	3055.81	81.6744	42.628	darkgreen
AT1G08350	0.5	0.00155042	0.238062	NA	0.412429	4	12453735	59.2932	3.62169e-08	1.43e-09	278	0	0.0418711	0.0391222	27.6579	2787.12	280.209	22.5182	turquoise
AT1G08360	0.714	0.00224348	0.0442936	NA	0.451613	1	12450606	42.2279	3.62169e-08	1.43e-09	3407	0	0.0730881	0.00239651	170.264	2651.04	5659.29	18.9225	tan
AT1G08370	0.730125	0.00150648	0.346853	3.66348	0.466486	1	12448508	56.0012	3.62772e-08	1.43e-09	5505	1161	0	0.0214751	33.1696	2757.39	997.391	21.0573	midnightblue
AT1G08380	1	0.00126808	0.0669593	NA	0.508274	1	12445742	51.1017	3.6236e-08	1.43e-09	8271	0	0.0980565	0.000343963	517.703	3835.61	80256	34.6305	greenyellow
AT1G08390	0.566625	0.00234822	0.339466	NA	0.512077	2	12444473	58.1909	3.61767e-08	1.43e-09	9540	0	0.146623	0.000406549	312.686	2831.77	216.406	40.0101	greenyellow
AT1G08400	0.40175	0.000683445	0.29791	2.84085	0.419876	1	12443526	57.956	3.6163e-08	1.43e-09	10487	0	0.00825082	0.0358678	31.6899	3602.43	174.859	23.2718	midnightblue
AT1G08410	0.745	0.000706168	0.103305	1.46366	0.450847	1	12440401	56.6756	3.6163e-08	1.43e-09	7978	0	0.0245678	0.0463905	20.0255	2649.61	522.969	18.7522	magenta
AT1G08420	0.803107	0.00120222	0.0282073	NA	0.486097	2	12437086	53.7257	3.63861e-08	1.43e-09	298	3235	0	0.0558252	9.90073	2721.63	2431.29	17.2066	yellow
AT1G08430	0.368	0.00139135	0.251885	0.373023	0.414305	1	12427943	54.8392	3.64707e-08	1.43e-09	682	10622	0	0.00157725	201.88	2237.04	43.786	214.834	turquoise
AT1G08440	0.686455	0.00376502	0.198212	1.93161	0.416335	1	12423578	55.9479	3.63576e-08	1.43e-09	0	6348	0	0.000724287	232.577	2084.49	9.51008	276.81	turquoise
AT1G08450	0.455095	0.00105474	0.0741552	NA	0.436863	3	12418747	54.636	3.6316e-08	1.43e-09	3882	0	0.00625	0.0321381	23.3568	3012.5	3708.32	53.3139	lightyellow
AT1G08460	0.593071	0.00248633	0.14857	NA	0.4903	2	12414347	55.6138	3.63393e-08	1.43e-09	1118	0	0.0994453	0.0128618	94.3099	2425.37	885.184	24.8621	lightcyan
AT1G08465	NA	0.00175358	0.093142	NA	0.45045	1	12410732	54.5003	3.63275e-08	1.43e-09	0	3306	0	0.000655232	244.662	2316.44	429.633	20.4155	greenyellow
AT1G08470	0.4158	0.00105607	0.0873033	NA	0.453538	1	12404487	60.0842	3.62916e-08	1.43e-09	6106	4324	0	0.000670938	264.55	2404.04	447.811	19.2016	brown
AT1G08480	0.404	0.00207788	0.088956	NA	0.484848	1	12402369	56.2733	3.63403e-08	1.43e-09	8224	2793	0	0.000858942	258.123	2854.4	1738.29	19.2108	lightgreen
AT1G08490	0.27225	0.000999302	0.0898013	NA	0.453305	1	12400886	56.7189	3.63318e-08	1.43e-09	9707	0	0.0546667	0.028062	29.8797	2653.89	1332.55	18.4528	salmon
AT1G08500	0.55975	0.00131172	0.447242	0.922108	0.406114	1	12397665	56.4275	3.64524e-08	1.43e-09	12928	10	0	0.000216704	382.793	3068.47	80.8961	66.8211	blue
AT1G08510	0.7702	0.00597239	0.0432439	1.2202	0.459241	1	12395483	52.3182	3.63603e-08	1.43e-09	15110	0	0.179002	0.0162079	46.3395	1950.01	4696.8	19.7576	greenyellow
AT1G08520	0.799516	0.00685466	0.0522156	NA	0.459921	1	12390164	56.2395	3.64196e-08	1.43e-09	10367	0	0.0577337	0.037923	20.3676	3617.49	8833.48	27.4614	black
AT1G08530	0.6722	0.00495094	0.161215	NA	0.431525	3	12385564	57.2721	3.64925e-08	1.43e-09	8227	0	0.122823	0.00341788	131.939	2048.6	302.363	19.6884	cyan
AT1G08540	0.760056	0.00572813	0.0866005	0.258316	0.450844	1	12383250	56.0124	3.65152e-08	1.43e-09	4529	2102	0	0.0569797	25.3184	3993.69	3318.65	23.9636	black
AT1G08550	0.7671	0.00320278	0.0679013	NA	0.436285	3	12379677	56.8736	3.64838e-08	1.43e-09	1401	1110	0	0.0397977	27.1061	3700.91	2833.39	41.643	cyan
AT1G08560	0.643045	0.0101615	0.0920724	0.792893	0.438371	1	12377020	50.6815	3.64838e-08	1.43e-09	389	98	0	0.000728465	370.595	3067.8	336.859	48.999	green
AT1G08570	0.808676	0.00343457	0.224857	NA	0.455314	4	12373851	52.4498	3.65108e-08	1.43e-09	672	0	0.0845794	0.00144912	195.306	2771.64	2691.99	40.9465	lightcyan
AT1G08580	0.52675	0.00383396	0.18815	1.08979	0.446237	1	12371551	48.3009	3.65952e-08	1.43e-09	2972	2120	0	0.000636637	297.346	2597.64	625.029	22.9248	tan
AT1G08590	0.723263	0.00113284	0.182122	0.972872	0.444013	1	12368007	53.8954	3.66877e-08	1.44e-09	6516	0	0.0670585	0.0356133	23.4319	4063.68	100.158	39.5265	turquoise
AT1G08600	0.785169	0.00133711	0.358138	NA	0.419595	4	12362868	55.7042	3.6963e-08	1.44e-09	11655	1525	0	0.047813	16.6314	3598.21	970.126	18.4724	yellow
AT1G08610	0.5407	0.00195688	0.147147	2.69398	0.429167	1	12352949	57.5222	3.69759e-08	1.44e-09	21574	0	0.00494604	0.0387084	25.0971	1840.92	187.741	38.2951	magenta
AT1G08620	0.733846	0.00113475	0.415266	NA	0.431373	4	12349889	56.9729	3.71856e-08	1.44e-09	24634	0	0.0178522	0.055014	17.4988	3273.45	1046.99	17.2893	yellow
AT1G08630	0.792541	0.00360829	0.120926	NA	0.476323	7	12342784	56.8418	3.74052e-08	1.44e-09	31739	3203	0	0.00655112	103.126	2519.28	56.1922	145.229	turquoise
AT1G08640	0.681182	0.00537936	0.265502	0.308582	0.430508	1	12338184	53.5442	3.76565e-08	1.44e-09	36339	0	0.107669	0.0251264	34.824	2114.63	1755.23	25.3378	black
AT1G08645	NA	0.00668946	NA	NA	0.484848	1	12334732	50.2765	3.78045e-08	1.44e-09	35835	293	0	0.000164913	621.026	NA	NA	NA	NA
AT1G08650	0.681256	0.00801451	0.0921328	NA	0.505263	2	12334421	52.0433	3.81983e-08	1.44e-09	34621	0	0.0895611	0.00014084	482.765	1822.16	1061.67	32.6871	pink
AT1G08660	0.725189	0.00262613	0.093438	NA	0.445614	3	12329641	58.3671	3.78992e-08	1.44e-09	28541	956	0	0.0269205	32.513	3404.96	1066.04	21.2133	blue
AT1G08670	0.4836	0.00448982	0.320141	NA	0.418103	2	12326362	56.9434	3.77783e-08	1.44e-09	26831	4235	0	0.000987853	273.356	3120.76	6	122.259	turquoise
AT1G08680	0.596916	0.00441846	0.598979	NA	0.448875	5	12323961	56.7787	3.75488e-08	1.44e-09	19463	2426	0	0.0546131	12.3362	3221.73	1236.42	17.8731	yellow
AT1G08695	0.546	0.00232143	0.283916	5.19399	0.393258	1	12317580	60.836	3.73978e-08	1.44e-09	18922	1885	0	8.24e-05	959.613	NA	NA	NA	NA
AT1G08700	0.811571	0.0019956	0.110066	1.05536	0.460352	1	12316930	56.4246	3.72491e-08	1.44e-09	16953	0	0.0456253	0.00256822	172.246	2135.45	830.563	17.3809	pink
AT1G08710	0.504333	0.00120777	0.299461	NA	0.426802	2	12314925	56.4802	3.72491e-08	1.44e-09	14899	0	0.0648536	0.00604236	102.029	2428.36	325.085	17.2243	grey60
AT1G08720	0.636241	0.00195982	NA	NA	0.453605	2	12312604	56.6569	3.71791e-08	1.43e-09	9122	2198	0	0.0410987	19.5962	2157.2	1162.31	16.3989	red
AT1G08730	0.642846	0.00110799	0.0754549	NA	0.422136	2	12307107	55.5727	3.69916e-08	1.43e-09	0	7695	0	0.0190314	48.4378	1462.87	33.5798	102.222	turquoise
AT1G08750	0.495857	0.00106411	0.15793	NA	0.413882	3	12285503	54.5598	3.67869e-08	1.43e-09	341	4085	0	0.0254391	30.208	2469.17	389.802	13.4782	blue
AT1G08760	0.721688	0.00206488	0.262041	0.87934	0.450823	1	12281501	55.9931	3.67337e-08	1.44e-09	4343	173	0	0.0425331	24.6998	3276.44	638.414	16.3249	yellow
AT1G08770	0.789778	0.00170099	0.104816	1.57365	0.507937	1	12277785	55.5895	3.6717e-08	1.44e-09	8059	0	0.0994094	0.000223302	430.965	2061.44	594.795	19.0328	pink
AT1G08780	0.5465	0.00306597	0.0700891	NA	0.44359	1	12276767	57.2052	3.6717e-08	1.44e-09	9077	882	0	0.00315574	157.695	2243.08	398.543	18.0594	tan
AT1G08790	0.814	0.00172859	0.105706	NA	0.485166	1	12274556	52.4311	3.67247e-08	1.44e-09	11288	3093	0	0.00264326	239.748	NA	NA	NA	NA
AT1G08800	0.710833	0.00108619	0.404278	NA	0.412029	4	12273727	54.1792	3.678e-08	1.44e-09	12117	3922	0	0.0136435	52.4899	2397.49	826.381	26.3454	yellow
AT1G08810	0.787167	0.00100962	0.214425	NA	0.419929	3	12267480	52.5842	3.67612e-08	1.44e-09	18364	6479	0	0.00193912	220.379	2160.81	262.186	32.0896	pink
AT1G08820	0.673636	0.00248449	0.33948	NA	0.435831	5	12265191	59.3466	3.68624e-08	1.44e-09	20653	1476	0	0.033502	23.1686	2392.99	1209.83	14.2024	blue
AT1G08830	1	0.00306799	0.0915817	NA	0.511983	2	12259485	46.3084	3.68624e-08	1.44e-09	26359	0	0.0212766	0.00986858	46.6917	1212.05	4004.31	42.3732	blue
AT1G08840	0.6474	0.00100146	NA	NA	0.427427	5	12257440	55.4255	3.68522e-08	1.44e-09	27055	32	0	0.0476488	12.4137	2162.53	217.75	34.8798	turquoise
AT1G08845	NA	0.00129894	0.104194	NA	0.453901	3	12247756	59.8492	3.69994e-08	1.43e-09	24776	0	0.0643649	0.0358676	26.943	1525.33	160.788	20.3246	black
AT1G08860	0.654143	0.00193427	0.182238	0.653793	0.438746	1	12244576	55.1595	3.72658e-08	1.43e-09	19560	1410	0	0.0287633	27.1795	1968.35	8.46512	157.056	purple
AT1G08880	1	0.00249999	0.0314568	NA	0.505828	1	12239651	53.3514	3.74974e-08	1.43e-09	17810	0	0.282519	9.37e-05	554.03	3157.79	1696.72	31.3837	blue
AT1G08890	0.524375	0.00201084	0.116403	0.496463	0.41362	1	12238396	55.8919	3.74974e-08	1.43e-09	13640	0	0.0393013	0.000203752	260.101	3050.34	768.606	80.3476	blue
AT1G08900	0.5287	0.00425046	0.166688	NA	0.412527	5	12234182	55.5279	3.72615e-08	1.43e-09	9969	104	0	0.000240402	320.242	2604.6	1579.01	36.6278	lightcyan
AT1G08910	0.497926	0.00314007	0.622556	1.87641	0.451004	1	12230383	55.1696	3.68812e-08	1.43e-09	4740	0	0.00678778	0.0465541	18.4379	2789.44	718.388	22.9339	midnightblue
AT1G08920	0.746872	0.00329001	0.162599	NA	0.41841	3	12219342	51.5488	3.65218e-08	1.43e-09	680	0	0.017217	0.00208745	137.596	2457.9	1006.15	48.2712	blue
AT1G08930	0.696083	0.00289444	0.0410655	NA	0.43729	2	12213245	58.2471	3.6366e-08	1.43e-09	6777	0	0.0611937	0.000429848	283.574	2743.77	11353.2	58.4065	red
AT1G08940	0.756143	0.00298919	0.09498	0.20848	0.477541	1	12209115	53.7421	3.61986e-08	1.43e-09	7256	3888	0	0.00485344	351.853	3416.54	174.904	52.7023	turquoise
AT1G08960	0.4525	0.000590727	0.0836073	1.90773	0.447288	1	12207039	56.1706	3.60368e-08	1.43e-09	4191	5964	0	0.0175399	46.9125	3424.02	340.991	23.3462	midnightblue
AT1G08970	1	0.000919577	0.0408985	NA	0.510057	4	12204054	57.1772	3.5939e-08	1.43e-09	2083	3865	0	0.0408876	38.7066	2419.28	1340.72	13.1888	cyan
AT1G08980	0.4132	0.0013031	0.117163	1.71442	0.475743	1	12202194	57.3799	3.5939e-08	1.43e-09	0	1586	0	0.00904945	98.326	3509.77	2748.15	43.0658	blue
AT1G08985	0.283	0.000487578	0.531731	NA	0.356209	1	12199300	59.1455	3.5939e-08	1.43e-09	0	501	0	0.00540816	404.246	NA	NA	NA	NA
AT1G08990	0.614571	0.00189833	0.255801	0.58462	0.452087	1	12198118	58.0646	3.58296e-08	1.43e-09	232	0	0.0220559	0.000696258	265.111	2283.19	23.0605	224.509	turquoise
AT1G09000	0.8271	0.000983827	0.287654	NA	0.442779	2	12195526	57.22	3.58605e-08	1.43e-09	2824	2537	0	0.011321	48.1924	2289.48	108.71	33.4746	green
AT1G09010	0.664697	0.00129649	0.154294	3.39737	0.439859	1	12191379	57.4751	3.58007e-08	1.42e-09	6971	6684	0	0.0459577	21.8872	2697.73	2445.31	21.4888	lightcyan
AT1G09020	0.914	0.000793236	0.0261646	NA	0.474727	1	12186769	57.9403	3.57879e-08	1.42e-09	11325	11294	0	0.0509136	15.9484	2709.97	1515.5	14.2376	yellow
AT1G09026	0	NA	NA	NA	NA	NA	NA	NA	NA	NA	NA	NA	NA	NA	NA	NA	NA	NA	NA
AT1G09030	NA	8.18e-05	0.132674	NA	0.45	1	12177934	57.3646	3.56895e-08	1.42e-09	7155	17629	0	0.0034387	393.046	NA	NA	NA	NA
AT1G09040	0.41075	0.000602079	0.454925	3.59124	0.430921	1	12175295	55.3633	3.56424e-08	1.42e-09	781	11255	0	0.0289926	31.2944	2282.93	138.574	25.6378	blue
AT1G09050	0.610667	0.000933618	NA	NA	0.431479	2	12169577	55.0306	3.56063e-08	1.42e-09	238	5550	0	0.0457365	22.8786	2272.44	143.922	24.3704	cyan
AT1G09060	0.511353	0.000822972	0.263615	NA	0.448677	4	12165481	56.0071	3.56539e-08	1.41e-09	4334	835	0	0.0639797	21.4984	3269.95	1688.75	17.5299	brown
AT1G09070	0.490167	0.0020729	0.120887	1.81138	0.522051	1	12159043	48.524	3.56742e-08	1.41e-09	10772	0	0.0317559	0.000165856	357.515	2962.73	9096.35	66.9108	purple
AT1G09080	0.636853	0.000674943	0.114708	NA	0.436884	2	12157328	56.4818	3.56742e-08	1.41e-09	12487	1531	0	0.0162362	62.973	1202.26	27.0729	328.207	pink
AT1G09090	0.614787	0.00196415	0.163657	NA	0.443523	2	12153806	59.1619	3.56742e-08	1.41e-09	16009	2694	0	0.0226242	40.9212	1943.71	21.0853	195.747	turquoise
AT1G09100	0.873875	0.00156536	NA	0.457589	0.445755	1	12150017	52.9159	3.56398e-08	1.41e-09	19798	0	0.0296192	0.0533998	18.6773	2304.87	848.422	27.684	blue
AT1G09130	0.670944	0.00209343	0.0413407	NA	0.458221	3	12146977	55.1819	3.55435e-08	1.41e-09	22838	0	0.0226782	0.0325649	30.7712	3133.62	5265.33	19.8016	greenyellow
AT1G09140	0.811619	0.00253397	0.364169	NA	0.47088	3	12144007	55.841	3.55779e-08	1.42e-09	25808	0	0.022681	0.0505228	18.4184	2862.41	2144.64	25.7877	turquoise
AT1G09150	0.6554	0.00151807	0.0715444	1.2544	0.446886	1	12140515	57.9091	3.55331e-08	1.42e-09	29300	0	0.0942492	0.0196208	33.1665	2792.67	1038.85	13.4037	blue
AT1G09155	0.478125	0.00141903	0.247917	11.1298	0.444828	1	12136924	60.4332	3.54604e-08	1.41e-09	32891	3297	0	0.000323105	326.182	2184.01	6.41085	101.143	turquoise
AT1G09157	0.479789	0.0030205	NA	3.73926	0.476776	1	12134910	53.379	3.54403e-08	1.41e-09	31827	5311	0	0.000767359	714.354	NA	NA	NA	NA
AT1G09160	0.702125	0.00153439	0.140258	NA	0.443667	2	12133948	54.1141	3.54403e-08	1.41e-09	28572	6273	0	0.014873	35.6743	2989.87	1151.32	22.5763	darkred
AT1G09170	0.69	0.00539162	0.282548	NA	0.427889	8	12130284	55.4619	3.54946e-08	1.41e-09	21771	2192	0	0.00447269	73.108	2045.34	53.7891	54.8565	green
AT1G09176	0.2984	0.00332066	0.416914	43.3455	0.501104	1	12122530	54.8872	3.57106e-08	1.41e-09	19590	11	0	0.000309761	696.539	1541.22	5.03411	114.684	brown
AT1G09180	0.448818	0.00360661	NA	1.44232	0.434708	1	12121522	59.3724	3.57384e-08	1.41e-09	18345	10	0	0.00971149	317.735	3065.32	87.307	72.0768	brown
AT1G09190	0.719479	0.0059337	NA	0.636198	0.459107	1	12120425	56.6476	3.57384e-08	1.41e-09	16584	1107	0	0.0403879	45.1905	2309.41	72.2248	33.9303	darkturquoise
AT1G09195	0.741615	0.00545237	0.175149	NA	0.420635	15	12118605	58.0377	3.57529e-08	1.41e-09	12749	686	0	0.0196873	48.0316	2794.48	339.805	23.3883	blue
AT1G09200	0.924	0.00473231	NA	NA	0.53528	1	12114974	38.536	3.56889e-08	1.41e-09	11983	0	0.106021	0.000121872	551.194	2818.74	1026.33	38.6645	green
AT1G09210	0.765556	0.00220526	0.106928	0.880457	0.476863	1	12113907	49.5647	3.56036e-08	1.41e-09	7315	0	0.0756014	0.002251	122.162	2088.55	3842.98	24.0527	pink
AT1G09220	0.749176	0.00410141	NA	1.43238	0.420462	1	12108753	54.6308	3.55935e-08	1.41e-09	4851	619	0	0.0172759	71.8738	2284.82	42.2341	33.4762	darkturquoise
AT1G09230	0.627286	0.003145	0.301177	NA	0.446953	3	12107034	56.6217	3.56015e-08	1.41e-09	1604	0	0.0299719	0.0234943	37.2662	2712.22	447.198	27.7507	blue
AT1G09240	0.436333	0.00140882	0.246257	NA	0.439252	1	12101716	53.6784	3.5589e-08	1.41e-09	14	1450	0	0.00308458	260.889	1469.54	140.135	182.381	greenyellow
AT1G09245	0.623882	0.00614979	0.666463	58.13	0.338095	1	12099671	60.5491	3.55618e-08	1.41e-09	0	288	0	0.202279	57.5713	NA	NA	NA	NA
AT1G09250	0.553714	0.00153777	0.115607	5.50743	0.463016	1	12097404	56.6166	3.55513e-08	1.41e-09	2123	442	0	0.000169762	376.05	2443.42	1010.73	31.782	greenyellow
AT1G09260	0.680556	0.00736524	NA	0.854357	0.376499	1	12093164	52.9841	3.54467e-08	1.41e-09	6363	471	0	0.170245	91.617	NA	NA	NA	NA
AT1G09270	0.56375	0.00111655	0.102582	NA	0.467532	3	12092214	55.129	3.52896e-08	1.41e-09	7313	0	0.0156732	0.0410115	18.5722	2425.63	1838.06	11.4862	yellow
AT1G09280	0.599417	0.000986094	0.203633	7.83039	0.453036	1	12088445	58.7605	3.51563e-08	1.41e-09	11082	3709	0	0.0534929	17.4836	3465.05	615.69	20.2126	blue
AT1G09290	0.5295	0.00110179	0.542542	1.2432	0.434575	1	12085106	54.9537	3.51992e-08	1.41e-09	14421	7048	0	0.0344716	24.6744	2304.53	299.233	20.8538	tan
AT1G09300	0.434	0.000756588	0.10482	NA	0.438596	2	12083050	57.0074	3.51427e-08	1.41e-09	15005	6734	0	0.0409317	19.9342	1957.3	314.161	23.0924	magenta
AT1G09310	0.6815	0.000783518	0.0358109	0.263025	0.47963	1	12077635	51.6074	3.50486e-08	1.4e-09	13488	5217	0	0.0147501	77.787	3496.27	29159	41.644	brown
AT1G09320	0.3877	0.000613971	0.144619	10.6958	0.454311	1	12076655	56.283	3.50486e-08	1.4e-09	10979	2708	0	0.0121234	55.5913	3317.18	229.487	22.5295	blue
AT1G09330	1	0.000793824	NA	NA	0.442068	2	12073806	54.2786	3.50486e-08	1.41e-09	8131	0	0.0774732	0.00873742	66.9478	2420.04	938.443	13.8191	tan
AT1G09340	1	0.00102026	0.105532	NA	0.454386	2	12071308	55.471	3.51224e-08	1.41e-09	4844	0	0.168179	0.0108383	59.5069	3902.32	22266.5	40.0073	salmon
AT1G09350	0.607214	0.00154667	0.0992214	NA	0.470647	2	12066906	51.1609	3.50984e-08	1.41e-09	1943	193	0	0.00040965	295.029	1499.25	73.4961	173.453	blue
AT1G09360	0.21925	0.00140174	0.403982	NA	0.393298	1	12064743	51.8346	3.50732e-08	1.41e-09	1018	2356	0	0.00124878	367.019	NA	NA	NA	NA
AT1G09370	0.352333	0.00176527	0.747579	NA	0.416196	1	12061668	52.2874	3.49605e-08	1.41e-09	0	5107	0	0.00123084	401.421	NA	NA	NA	NA
AT1G09380	0.7932	0.00186495	0.155107	2.35707	0.469333	1	12060483	56.9041	3.49595e-08	1.41e-09	1172	1097	0	0.00104895	167.668	2405.65	5.66202	141.673	turquoise
AT1G09390	0.395167	0.00116541	0.187448	NA	0.457323	1	12055499	59.7072	3.49009e-08	1.41e-09	6156	0	0.148601	0.00992122	85.3215	2555.15	557.076	38.533	black
AT1G09400	0.455385	0.00150446	0.175642	NA	0.461538	2	12053033	52.4176	3.48821e-08	1.41e-09	8622	1641	0	0.00179994	246.785	1755.65	20.0481	59.3387	purple
AT1G09410	0.6229	0.000706918	NA	0.676889	0.428706	1	12051145	55.7522	3.4864e-08	1.4e-09	10510	3529	0	0.0120336	72.6922	2038.05	34.3302	44.0379	darkturquoise
AT1G09415	0.649286	0.0020529	NA	18.4293	0.412979	1	12048791	52.1838	3.4864e-08	1.4e-09	12864	5883	0	0.000188545	684.933	2988.3	646.133	41.8101	red
AT1G09420	0.460875	0.00158933	0.255904	NA	0.433438	2	12048083	57.1626	3.4864e-08	1.4e-09	13572	6591	0	0.0274223	39.7009	2074.7	814.876	65.9825	blue
AT1G09430	0.5133	0.00133398	0.0316975	5.64163	0.44	1	12044549	56.1058	3.48625e-08	1.4e-09	17106	10125	0	0.0275228	31.9787	2883.57	2885.5	24.3584	lightcyan
AT1G09440	0.642167	0.000651385	0.180158	NA	0.428979	2	12041286	53.3943	3.48401e-08	1.4e-09	20369	13388	0	0.0229341	48.9359	3248.09	300.812	28.5492	brown
AT1G09450	0.647222	0.00115702	0.240625	1.18801	0.425	1	12037579	55.8648	3.48401e-08	1.4e-09	15306	17095	0	0.0194157	43.8807	2928.74	52.1442	56.1626	green
AT1G09460	0.6551	0.00187824	0.288003	0.41489	0.475327	1	12032847	54.0943	3.4828e-08	1.4e-09	13109	19956	0	0.0349216	40.7906	3677.82	216.791	69.8488	green
AT1G09470	0.355375	0.00163883	0.244774	NA	0.433166	3	12031314	51.753	3.4828e-08	1.4e-09	10926	17773	0	0.0208751	50.5302	2702.9	73.214	52.0884	green
AT1G09480	0.378312	0.0019026	NA	NA	0.434234	2	12028570	54.2934	3.49249e-08	1.4e-09	7712	14559	0	0.000463445	779.882	1572.55	121.682	61.6858	turquoise
AT1G09483	0.53025	0.00510413	NA	0.992432	0.41195	1	12025375	60.0895	3.49998e-08	1.4e-09	6726	13573	0	0.00156362	360.16	NA	NA	NA	NA
AT1G09490	0.651167	0.00221018	0.259552	NA	0.435501	2	12022609	54.391	3.49998e-08	1.4e-09	2520	9367	0	0.000807319	228.138	2360.16	916.654	43.4795	brown
AT1G09500	0.578485	0.00193075	0.399734	NA	0.440695	3	12019871	56.453	3.5107e-08	1.4e-09	0	6520	0	0.000472305	290.181	1728.32	385.129	117.876	brown
AT1G09510	0.521778	0.00185801	0.22087	0.816652	0.447884	1	12017188	55.6652	3.49163e-08	1.4e-09	123	4406	0	0.00270154	229.341	NA	NA	NA	NA
AT1G09520	0.524667	0.00112045	NA	NA	0.503193	1	12015630	55.6106	3.49559e-08	1.39e-09	1153	3242	0	0.000158184	401.001	2019.71	439.726	20.8572	brown
AT1G09530	0.776697	0.00545851	0.236432	NA	0.457143	6	12010777	52.4869	3.49548e-08	1.4e-09	349	0	0.0807821	0.0149226	60.8467	2210.52	418.826	50.2145	turquoise
AT1G09540	0.599286	0.00149686	0.188297	2.2648	0.441417	1	12000444	53.4097	3.49541e-08	1.4e-09	2170	5274	0	0.00051661	416.312	2521.37	16.9178	82.7269	turquoise
AT1G09550	0.58495	0.00399485	0.334465	0.557122	0.44473	1	11996969	58.5721	3.50772e-08	1.4e-09	0	861	0	0.00252644	176.413	NA	NA	NA	NA
AT1G09560	0.726571	0.00244186	0.131837	0.324364	0.475758	1	11992901	50.2681	3.50772e-08	1.41e-09	3372	0	0.20595	0.000100547	523.39	2458.98	3398.56	43.3739	turquoise
AT1G09570	0.744111	0.000834153	0.0532899	NA	0.457261	6	11991385	57.0231	3.51872e-08	1.41e-09	4888	0	0.0985866	0.0475591	27.0325	3526.77	5519.95	38.176	blue
AT1G09575	0.737333	0.00154103	0.204574	NA	0.431172	2	11985396	54.1635	3.51872e-08	1.41e-09	5642	0	0.0201661	0.000174414	307.557	2562.34	164.304	44.6677	black
AT1G09580	0.729143	0.00379918	0.0998821	0.156362	0.464832	1	11982053	58.9341	3.51872e-08	1.41e-09	2953	3130	0	0.00852195	78.4797	2825.9	299.388	23.1918	green
AT1G09590	0.840333	0.00184802	NA	NA	0.511111	1	11980178	47.1639	3.51872e-08	1.41e-09	1518	5005	0	0.000931819	284.975	1960.21	2979.47	30.4458	tan
AT1G09600	0.545222	0.00178645	NA	2.24524	0.441492	1	11978649	55.5665	3.51872e-08	1.41e-09	0	6534	0	0.0255567	42.9826	1744.42	28.5209	87.4974	turquoise
AT1G09610	0.286	0.000326731	0.286507	NA	0.449941	1	11974851	57.0787	3.52319e-08	1.41e-09	1984	6765	0	0.0205573	91.8314	2208.83	25.0667	47.1415	darkgreen
AT1G09620	0.428462	0.000588649	0.227729	1.2589	0.442002	1	11973767	56.1382	3.52319e-08	1.41e-09	3068	2939	0	0.0356766	18.8693	3350.46	3675.78	14.635	yellow
AT1G09625	0	0.00127467	0.430227	NA	0.426667	1	11969408	53.9672	3.51641e-08	1.41e-09	7223	2071	0	0.00225847	1009.94	NA	NA	NA	NA
AT1G09630	0.572	0.0029484	0.0766229	NA	0.454128	1	11968390	57.9718	3.51641e-08	1.41e-09	4975	0	0.242625	0.00313275	172.671	2524.32	520.033	26.7849	tan
AT1G09640	0.4903	0.000861859	0.11708	NA	0.469076	2	11966806	50.7385	3.51762e-08	1.41e-09	2248	0	0.21612	0.0104503	68.3574	2907.4	5916.39	14.0987	magenta
AT1G09645	0.6235	0.000825625	0.0880306	NA	0.433022	1	11963619	53.843	3.51925e-08	1.41e-09	123	0	0.0516648	0.000984031	228.385	2397.21	575.219	16.4798	blue
AT1G09650	0.575542	0.00337082	NA	1.75826	0.445605	1	11961370	57.0112	3.51925e-08	1.41e-09	165	2160	0	0.00206737	191.266	2407.54	10.4078	70.4083	turquoise
AT1G09660	0.533929	0.00316907	0.10567	NA	0.479376	3	11958783	58.3429	3.51984e-08	1.41e-09	2752	0	0.0507051	0.0249985	27.3437	2650.59	983.422	17.0967	blue
AT1G09665	0.7065	0.00908496	0.176065	1.02975	0.431727	1	11953537	52.9349	3.50666e-08	1.41e-09	6673	1482	0	0.000730507	475.861	NA	NA	NA	NA
AT1G09680	0.574632	0.0077186	0.317665	2.17812	0.414474	1	11952660	54.8936	3.50666e-08	1.41e-09	4371	1506	0	0.00666515	91.418	2422.35	33.9364	45.775	blue
AT1G09690	0.492	0.00223042	0.0234807	NA	0.511111	1	11950357	44.3014	3.50666e-08	1.41e-09	2663	0	0.225117	0.00055967	368.464	2688.13	6492.66	27.3737	tan
AT1G09700	0.754091	0.00177988	0.492393	NA	0.446032	2	11948896	52.3061	3.50666e-08	1.41e-09	0	0	0.124584	0.0211363	44.5171	2400.5	334.206	17.1931	tan
AT1G09710	0.468026	0.00197529	0.6367	NA	0.463902	5	11945683	53.5393	3.5057e-08	1.41e-09	144	3080	0	0.0453939	36.3967	2596.61	278.271	26.5997	blue
AT1G09720	0.473414	0.0015732	0.563839	14.5456	0.428776	1	11942107	55.2466	3.50783e-08	1.42e-09	3720	6656	0	0.00473967	118.805	NA	NA	NA	NA
AT1G09730	0.578614	0.00111638	0.455565	NA	0.412863	2	11938908	58.2962	3.50885e-08	1.42e-09	6919	0	0.0319149	0.0591233	14.4055	2500.76	1253.75	11.1634	yellow
AT1G09740	0.7118	0.00191316	0.0517316	NA	0.494186	2	11932155	57.8978	3.51031e-08	1.42e-09	13672	0	0.108707	0.00171761	179.994	3580.05	588.491	42.3064	turquoise
AT1G09750	0.7786	0.00167317	0.109969	0.160192	0.534074	1	11929044	56.4579	3.51388e-08	1.42e-09	16783	0	0.00970874	0.000251539	309.829	3199.86	3771.89	64.7239	cyan
AT1G09760	0.619143	0.00372445	0.116669	2.21635	0.421333	1	11927420	56.1477	3.51349e-08	1.42e-09	18407	0	0.0202492	0.0229138	49.6115	2686.98	989.662	15.148	tan
AT1G09770	0.781391	0.00432688	0.122382	0.129944	0.450099	1	11924713	48.4589	3.51516e-08	1.42e-09	21114	0	0.0224571	0.0355898	24.3286	3402.07	2704.19	19.951	blue
AT1G09780	0.859444	0.0024258	0.0682413	0.0349213	0.456392	1	11921175	48.3047	3.51516e-08	1.42e-09	24652	3454	0	0.00331977	116.008	3780.03	2763.48	31.9257	turquoise
AT1G09790	0.555778	0.00362575	0.149747	NA	0.446886	2	11918111	59.1352	3.5402e-08	1.42e-09	27716	6518	0	0.00603041	110.912	NA	NA	NA	NA
AT1G09794	NA	0.00144042	NA	NA	0.440986	1	11914640	53.2802	3.54054e-08	1.42e-09	31187	9989	0	0.000867213	292.3	2316.1	95.7783	30.0962	tan
AT1G09795	0.8764	0.00143012	0.212642	0.149374	0.454106	1	11913011	56.3697	3.54054e-08	1.42e-09	32816	7262	0	0.0201837	31.9561	3047.24	2041.33	29.5723	blue
AT1G09800	0.595077	0.00248906	0.193604	NA	0.47185	2	11909662	54.1716	3.54416e-08	1.42e-09	36165	3438	0	0.0196791	33.5782	2229.62	117.124	23.4042	lightgreen
AT1G09810	0.480063	0.00259639	0.493388	NA	0.423921	3	11905619	53.1355	3.54811e-08	1.42e-09	40208	0	0.0160655	0.0339979	37.277	2481.93	356.571	18.051	magenta
AT1G09812	0.7405	0.00227398	0.33948	16.5687	0.49354	1	11899103	52.4065	3.55309e-08	1.42e-09	35632	2970	0	0.000188282	391.786	2227.53	25.3333	56.1792	green
AT1G09815	0.568625	0.00653924	0.127489	0.24636	0.512	1	11897244	50.844	3.55309e-08	1.42e-09	34244	4695	0	0.000673111	321.592	2374.04	525.631	20.0489	tan
AT1G09820	0.596038	0.00790973	0.198606	1.28873	0.406919	1	11896291	59.0229	3.55309e-08	1.42e-09	31998	2449	0	0.0360838	28.5732	1451.81	192.102	23.0943	pink
AT1G09830	0.776243	0.00541937	0.117453	0.771043	0.467792	1	11893977	52.5588	3.55309e-08	1.42e-09	29442	0	0.0436011	0.0575456	20.9223	2068.08	996.338	22.5084	brown
AT1G09840	0.7738	0.00564764	0.0197871	NA	0.438389	11	11890826	56.7082	3.56414e-08	1.42e-09	24083	57	0	0.0146149	48.6089	2782.41	1309.14	17.0242	blue
AT1G09850	0.469727	0.00422666	0.124729	1.61696	0.444444	1	11884860	52.7756	3.57613e-08	1.42e-09	20336	16	0	0.0226705	43.595	2185.63	671.088	25.6368	blue
AT1G09860	0.606364	0.00235077	0.215716	NA	0.450521	1	11882529	54.9163	3.57613e-08	1.42e-09	19075	2347	0	0.0191385	90.2206	NA	NA	NA	NA
AT1G09870	0.649353	0.0071338	0.0995649	0.438168	0.436475	1	11880966	54.7964	3.57613e-08	1.42e-09	15772	3910	0	0.0198742	38.0516	1774.35	775.812	15.45	blue
AT1G09880	0.664696	0.0113967	0.19659	NA	0.417603	4	11877833	56.9556	3.56974e-08	1.42e-09	11018	7043	0	0.013801	88.7302	1624.26	24.462	54.3822	green
AT1G09890	0.662863	0.00546422	0.0806993	NA	0.414387	5	11872496	54.2978	3.58212e-08	1.41e-09	6883	12380	0	0.00769665	90.0316	2221.07	131.595	39.1903	darkgreen
AT1G09900	0.754911	0.00839032	0.109456	0.725381	0.417362	1	11868412	54.8506	3.58899e-08	1.41e-09	4557	16464	0	0.0557555	24.1807	2127.03	401.321	22.2152	orange
AT1G09910	0.55752	0.00319302	0.162435	NA	0.450197	3	11866510	55.5084	3.58995e-08	1.41e-09	0	15574	0	0.0359596	28.3857	1632.83	314.687	71.3106	turquoise
AT1G09920	0.9015	0.00550668	NA	NA	0.443869	1	11861861	58.2669	3.59528e-08	1.42e-09	126	13032	0	0.0288868	37.7331	2616.04	845.073	14.1658	pink
AT1G09930	0.626533	0.00321462	0.0867645	0.160163	0.434921	1	11859055	56.7071	3.59515e-08	1.41e-09	2932	9858	0	0.00152594	189.612	1886.42	28.9054	176.529	red
AT1G09932	0.734559	0.00650674	0.250346	NA	0.422733	4	11856095	55.1665	3.60435e-08	1.41e-09	5892	6856	0	0.0042934	323.316	2464.19	366.953	100.279	red
AT1G09935	0.607077	0.00739991	0.328857	NA	0.443966	2	11852621	57.7779	3.61817e-08	1.41e-09	9366	4585	0	0.0123143	112.27	NA	NA	NA	NA
AT1G09940	0.759972	0.00735262	0.158258	0.484831	0.456999	1	11849637	54.2473	3.62265e-08	1.41e-09	7894	561	0	0.04331	31.237	2755.75	947.693	52.2384	purple
AT1G09950	0.855444	0.00503822	0.218766	0.46737	0.512266	1	11846014	50.4081	3.62265e-08	1.41e-09	5585	0	0.138785	0.0112232	682.216	2427.77	103.96	146.023	purple
AT1G09960	0.799733	0.00439882	0.100355	0.447018	0.461187	1	11842559	54.6207	3.6234e-08	1.41e-09	232	540	0	0.0113929	69.9149	3632.63	215.428	33.1298	turquoise
AT1G09970	0.722356	0.00748665	0.107316	NA	0.456714	2	11834447	56.9591	3.61862e-08	1.41e-09	0	0	0.0610583	0.0182443	71.3428	2969.11	8502.66	40.6005	red
AT1G09980	0.722983	0.00366116	0.199109	NA	0.425903	3	11830356	57.1399	3.62483e-08	1.41e-09	336	0	0.0223303	0.0503742	14.4965	2767.87	1156.72	12.6917	yellow
AT1G09995	0	NA	NA	NA	0.397004	5	11824323	54.4701	3.62588e-08	1.42e-09	0	0	0.0218156	0.0399921	270.643	1022.27	87.8465	108.209	brown
AT1G10000	NA	0.00924437	NA	NA	0.476959	1	11822695	58.4802	3.62588e-08	1.42e-09	0	0	0.066315	0.101928	196.407	NA	NA	NA	NA
AT1G10010	0.66655	0.00355456	0.178237	NA	0.472397	2	11820659	59.0185	3.62173e-08	1.42e-09	1062	1949	0	0.00387256	122.537	NA	NA	NA	NA
AT1G10020	0.835368	0.00416126	0.0450929	0.0974387	0.513709	1	11817006	54.1503	3.62151e-08	1.42e-09	4715	23	0	0.000521973	251.813	2877.79	1507.23	41.5672	darkred
AT1G10030	0.321	0.00165432	0.112479	NA	0.438462	1	11812792	60.9421	3.62151e-08	1.42e-09	8929	0	0.0454339	0.0104869	55.0002	2660.64	355.186	22.9921	tan
AT1G10040	0.436937	0.00117548	0.332306	NA	0.435028	2	11810654	53.7748	3.62151e-08	1.42e-09	11067	2039	0	0.021164	59.2581	2728.74	107.879	54.8591	red
AT1G10050	0.652172	0.00267325	0.294815	NA	0.443127	3	11807753	56.3333	3.62038e-08	1.42e-09	13968	3697	0	0.0639915	22.1097	2906.39	616.757	19.002	red
AT1G10060	0.57026	0.00521477	0.171007	NA	0.442134	7	11802472	54.4232	3.6211e-08	1.41e-09	19249	36	0	0.00404182	129.316	3060.39	371.891	54.7694	blue
AT1G10070	0.695552	0.00258249	0.244276	NA	0.443873	3	11798458	54.4389	3.61254e-08	1.42e-09	23263	434	0	0.004715	148.515	2693.65	388.433	144.329	blue
AT1G10090	0.7025	0.00273532	0.319966	2.3077	0.425513	1	11796234	58.708	3.61067e-08	1.42e-09	25487	0	0.017663	0.0292974	29.0921	3246.88	1465.01	38.8839	blue
AT1G10095	0.656971	0.00256833	0.463705	NA	0.428266	4	11790029	58.2928	3.62134e-08	1.42e-09	30302	0	0.0324919	0.0260158	26.2178	2540.95	177.829	25.5892	blue
AT1G10100	NA	0.00165037	NA	10.143	0.451943	1	11785848	58.4646	3.62134e-08	1.42e-09	29329	626	0	0.000454909	701.194	NA	NA	NA	NA
AT1G10110	0.616692	0.0027997	0.629657	2.67676	0.449167	1	11783981	57.9091	3.62134e-08	1.42e-09	26880	174	0	0.0117882	93.1767	795.772	34.586	327.852	turquoise
AT1G10120	0.740333	0.00321689	0.182116	NA	0.445958	2	11782506	50.4243	3.62083e-08	1.42e-09	23862	1649	0	0.00463161	97.5428	2628.73	625.667	34.6088	darkred
AT1G10130	0.557407	0.00232948	0.0551958	0.833264	0.436103	1	11775615	56.3635	3.63564e-08	1.41e-09	8549	2141	0	0.0455193	15.4636	2414.24	1563.45	13.4037	yellow
AT1G10140	0.756714	0.00241482	0.295789	0.207399	0.492063	1	11763991	47.0085	3.63665e-08	1.41e-09	7083	675	0	0.000161266	480.795	3299.57	242.06	57.2328	lightcyan
AT1G10150	0.613667	0.00400182	NA	NA	0.416867	1	11760746	55.8144	3.63877e-08	1.41e-09	3204	0	0.0814978	0.00645674	145.203	3246.32	934.068	25.9717	brown
AT1G10155	0.621867	0.010676	0.421565	1.51502	0.423423	1	11760720	57.8953	3.63877e-08	1.41e-09	2370	0	0.0564024	0.000432108	614.411	2784.7	43.0124	103.084	pink
AT1G10170	0.665809	0.00409113	0.215508	NA	0.475482	4	11753041	53.4154	3.65119e-08	1.4e-09	591	3377	0	0.0686984	12.5541	2758.91	1925.16	21.0011	yellow
AT1G10180	0.6	0.00414239	0.0988825	1.07352	0.443723	1	11748360	57.2523	3.65708e-08	1.4e-09	752	0	0.018583	0.0638293	16.3482	3164.34	669.625	13.2851	turquoise
AT1G10190	0.610516	0.00555568	0.478833	1.50209	0.407221	1	11742859	58.0732	3.6713e-08	1.4e-09	0	1471	0	0.170759	66.2478	NA	NA	NA	NA
AT1G10200	0.770429	0.00314369	0.0206226	NA	0.458988	2	11740162	55.0744	3.6878e-08	1.4e-09	2610	386	0	0.000380604	431.656	3264.13	2539.3	34.4355	blue
AT1G10210	0.695563	0.00396169	0.0415427	NA	0.439353	3	11737463	53.1157	3.69034e-08	1.4e-09	5309	0	0.0242973	0.0311356	42.7822	2506.92	320.253	23.2643	blue
AT1G10220	0.543289	0.00486335	NA	NA	0.446898	2	11734622	54.0006	3.69034e-08	1.4e-09	7418	2309	0	0.000197548	385.268	1865.74	3.8186	105.61	turquoise
AT1G10225	NA	0.00781843	NA	2.73186	0.504587	1	11732302	47.4845	3.68874e-08	1.4e-09	5684	575	0	0.000214776	557.656	NA	NA	NA	NA
AT1G10230	0.387	0.000833148	NA	NA	0.461216	1	11730870	57.5618	3.68949e-08	1.4e-09	4389	69	0	0.0002738	442.199	2441.1	219.879	29.7363	tan
AT1G10240	0.824538	0.00189292	NA	NA	0.450318	2	11729918	54.59	3.68635e-08	1.4e-09	687	0	0.0185931	0.0280173	39.4149	3261.39	300.963	17.4254	midnightblue
AT1G10250	0.509	0.001992	NA	NA	0.388889	1	11726458	52.1212	3.70789e-08	1.4e-09	32	1402	0	0.00243885	789.674	NA	NA	NA	NA
AT1G10270	0.3647	0.00126963	NA	9.32305	0.484683	1	11723113	52.1128	3.71098e-08	1.4e-09	2116	0	0.0189419	0.0252092	35.8049	2919.13	371.212	32.7285	magenta
AT1G10280	0.621	0.00166501	0.055651	NA	0.461663	1	11720052	59.135	3.71302e-08	1.4e-09	5177	0	0.012913	0.00773602	97.5876	2228.68	176.588	19.9268	pink
AT1G10290	0.759313	0.00170843	0.0707801	0.379717	0.469217	1	11716143	54.3833	3.72107e-08	1.4e-09	2963	1060	0	0.0579071	12.933	2815.84	2494.49	16.6196	yellow
AT1G10300	0.56525	0.00328683	0.323014	NA	0.413275	3	11708667	50.1599	3.73911e-08	1.4e-09	12	8536	0	0.0207921	39.3389	2279.9	13.2884	80.9261	turquoise
AT1G10310	0.803111	0.00685212	0.116433	0.853251	0.485597	1	11705098	57.9239	3.73911e-08	1.4e-09	0	12105	0	0.0137553	58.2783	2287.86	630.623	18.9059	brown
AT1G10320	0.533311	0.00770167	0.368385	NA	0.442392	2	11702427	51.8326	3.73911e-08	1.4e-09	0	8457	0	0.0449843	21.0536	2441.99	533.006	21.9702	yellow
AT1G10330	0.666208	0.00720721	0.354254	1.90907	0.420228	1	11697946	58.2492	3.75623e-08	1.39e-09	199	6683	0	0.00199141	212.542	1601.96	55.5504	38.3156	turquoise
AT1G10340	0.536679	0.00368626	0.254436	NA	0.451353	2	11696223	58.7446	3.7525e-08	1.39e-09	1922	4200	0	0.00933045	107.592	2028.66	287.612	135.85	red
AT1G10350	0.736909	0.00473635	0.041717	0.404855	0.478095	1	11693602	54.2298	3.76545e-08	1.39e-09	4543	1652	0	0.00888914	139.78	1968.49	470.49	18.2458	blue
AT1G10360	0.6748	0.0027005	0.109823	4.65826	0.488304	1	11690994	56.2376	3.76545e-08	1.39e-09	7151	0	0.158232	0.000354449	319.42	4010.4	1562.48	41.9937	salmon
AT1G10370	0.656	0.00175472	0.121354	0.196574	0.489766	1	11689662	56.7245	3.7654e-08	1.39e-09	8483	0	0.150407	0.000260915	425.509	3533.03	1534.28	85.4884	brown
AT1G10380	0.568667	0.00144284	0.0936963	NA	0.432852	2	11685991	53.0328	3.80815e-08	1.39e-09	10679	1581	0	0.000341827	299.615	2300.85	309.056	50.5277	brown
AT1G10385	0.60036	0.00173976	0.0575881	1.35384	0.460927	1	11683413	54.9441	3.80815e-08	1.39e-09	7179	4159	0	0.00383035	121.481	NA	NA	NA	NA
AT1G10390	0.5845	0.00126208	NA	NA	0.483685	3	11679589	55.7664	3.85083e-08	1.39e-09	225	6864	0	0.0705024	13.7451	3371.84	2859.1	16.4944	yellow
AT1G10395	NA	NA	NA	NA	0.444444	1	11674071	53.9206	3.85905e-08	1.39e-09	357	6996	0	NA	NA	NA	NA	NA	NA
AT1G10400	0.353714	0.00105898	0.310273	19.8988	0.467236	1	11671722	56.9576	3.85905e-08	1.39e-09	0	3264	0	0.0106342	70.9673	2601.23	5.74729	117.798	turquoise
AT1G10410	0.461	0.000663587	0.147496	1.63261	0.423182	1	11670115	56.7941	3.86436e-08	1.39e-09	1519	47	0	0.0297636	42.1931	3095.14	863.591	23.5888	turquoise
AT1G10417	0.426	0.00153779	0.463042	NA	0.402715	4	11662359	56.407	3.89407e-08	1.38e-09	317	2698	0	0.00801601	53.4126	2138.18	34.1736	57.346	green
AT1G10430	0.9248	0.00150551	0.011932	NA	0.453855	2	11658067	58.6423	3.92388e-08	1.38e-09	561	0	0.0208418	0.00522838	92.9145	1552.17	837.845	14.0614	black
AT1G10450	0.542375	0.00122768	0.392557	NA	0.408859	3	11654781	58.0212	3.94507e-08	1.38e-09	3847	22	0	0.045364	13.0899	3314.65	880.933	18.7113	yellow
AT1G10455	0.75	0.00252823	0.636969	NA	0.396514	1	11647990	54.4135	4.00129e-08	1.38e-09	10638	3441	0	0.000637151	592.824	NA	NA	NA	NA
AT1G10460	0.460667	0.0029113	0.264444	2.35961	0.5	1	11647515	59.5829	4.04448e-08	1.38e-09	11113	2095	0	0.000223256	347.243	2193.79	37.9302	52.8547	black
AT1G10470	0.753	0.0025383	0.245936	NA	0.465385	3	11644557	51.1353	4.10317e-08	1.38e-09	14071	0	0.309313	0.000838825	267.823	3562.75	3299.31	45.257	salmon
AT1G10480	0.682667	0.00138022	0.164872	1.85709	0.474843	1	11636978	54.0849	3.97433e-08	1.38e-09	21650	2389	0	0.000408046	464.754	2549.89	13.1023	160.484	turquoise
AT1G10490	0.58728	0.00173061	0.117569	NA	0.421121	2	11633354	55.1882	3.95247e-08	1.38e-09	21089	6013	0	0.0519013	12.1897	2055.04	686.217	21.5567	magenta
AT1G10500	0.63275	0.00246744	0.135038	NA	0.447514	1	11626545	56.0783	3.94866e-08	1.38e-09	20224	8021	0	0.00276946	189.628	3044.01	1350.38	26.3488	brown
AT1G10510	0.673667	0.00163034	0.0798247	0.551636	0.435094	1	11624910	57.5269	3.94344e-08	1.38e-09	15923	3720	0	0.042403	17.457	2809.45	1417.3	15.7493	black
AT1G10520	0.561889	0.00161743	0.379901	NA	0.449057	2	11620619	57.425	3.94428e-08	1.38e-09	12254	51	0	0.03797	16.312	1700.22	56.831	39.6961	turquoise
AT1G10522	0.745429	0.00284316	NA	NA	0.457407	2	11617033	59.9027	3.93421e-08	1.38e-09	10221	0	0.161861	0.00735173	80.6134	2542.94	510.152	38.9336	orange
AT1G10530	0.736429	0.00348273	0.234053	1.70666	0.48503	1	11615089	53.8185	3.93421e-08	1.38e-09	9035	1625	0	0.00402526	112.881	3115.37	17.6791	82.7349	turquoise
AT1G10540	0.471769	0.00197907	0.238256	NA	0.431481	2	11611687	54.5371	3.91631e-08	1.38e-09	3681	616	0	0.00270829	128.828	1545.23	22.1411	90.4458	blue
AT1G10550	0.701786	0.00364805	0.15607	0.48425	0.471597	1	11607479	54.9976	3.85796e-08	1.38e-09	668	0	0.076417	0.000199986	351.927	1332.49	478.071	178.256	darkred
AT1G10560	0.65287	0.00145547	0.324329	1.2432	0.470869	1	11602146	55.7237	3.81611e-08	1.38e-09	2381	0	0.0623296	0.000191408	254.34	2002.6	175.371	64.7775	purple
AT1G10570	0.4893	0.00187027	0.360642	NA	0.423077	3	11599159	58.146	3.77515e-08	1.38e-09	5368	2828	0	0.0219882	45.3858	1897.64	699.792	23.6704	blue
AT1G10580	0.851435	0.00106515	0.125799	0.342144	0.469803	1	11595287	52.9314	3.77703e-08	1.38e-09	3846	6700	0	0.0218819	39.4388	3783.52	1000.2	18.921	magenta
AT1G10585	0.4954	0.00205562	0.297767	NA	0.397436	2	11592775	58.772	3.77802e-08	1.38e-09	2436	8152	0	0.0010408	368.705	1527.4	39.0465	138.336	pink
AT1G10586	0.791667	0.00126452	0.58226	NA	0.407619	2	11589634	58.1263	3.76095e-08	1.38e-09	0	3957	0	0.22186	42.5583	NA	NA	NA	NA
AT1G10588	0.57505	0.00131251	0.370281	NA	0.43956	2	11585400	59.1371	3.73886e-08	1.38e-09	2151	1492	0	0.00439671	242.301	NA	NA	NA	NA
AT1G10590	0.924733	0.00110448	0.185871	NA	0.454545	3	11584557	57.2847	3.73886e-08	1.38e-09	2816	0	0.0956969	0.0110878	105.851	2649.75	2413.84	16.4071	lightgreen
AT1G10600	0.4314	0.0011558	0.102846	NA	0.444974	4	11582905	53.5547	3.73849e-08	1.38e-09	201	0	0.0424603	0.00759152	94.2383	2589.48	560.361	21.9743	blue
AT1G10610	0.59275	0.00154247	0.43015	NA	0.42006	3	11580359	54.8182	3.73798e-08	1.38e-09	0	292	0	0.00397914	302.246	2002.49	384.175	33.3232	cyan
AT1G10620	0.367333	0.0017337	0.247387	9.66408	0.472879	1	11577544	56.7881	3.72692e-08	1.38e-09	2503	0	0.0605239	0.00636205	108.614	NA	NA	NA	NA
AT1G10630	1	0.000618565	0.0206524	NA	0.470696	2	11573806	45.3488	3.72382e-08	1.38e-09	4783	3241	0	0.0128907	60.0893	2364.21	1566.04	15.6751	lightgreen
AT1G10640	0.75564	0.00166087	NA	1.21158	0.452783	1	11571363	51.7796	3.72113e-08	1.38e-09	1572	5375	0	0.00119248	228.062	2672.3	181.774	84.977	greenyellow
AT1G10650	0.762222	0.0027295	0.144894	NA	0.414706	2	11562559	52.5437	3.73508e-08	1.38e-09	56	0	0.0789474	0.00605726	108.484	3302.56	532.78	36.1626	royalblue
AT1G10657	0.808	0.00133248	0.100501	NA	0.436508	4	11556192	57.1767	3.72922e-08	1.38e-09	2856	2485	0	0.00103184	255.472	2089.92	304.384	46.7575	brown
AT1G10660	0.567333	0.00108738	0.213969	NA	0.43406	4	11554316	58.0332	3.72922e-08	1.38e-09	4732	4361	0	0.0179409	40.479	2209.63	1052.7	22.0268	brown
AT1G10670	0.678792	0.00147649	0.0594037	NA	0.442943	4	11551257	55.7522	3.73577e-08	1.37e-09	5874	7113	0	0.0192379	44.8269	3090.79	5761.78	15.475	brown
AT1G10680	0.643124	0.00158338	0.11741	NA	0.465798	2	11548212	58.4283	3.73577e-08	1.37e-09	388	1627	0	0.0115809	64.935	NA	NA	NA	NA
AT1G10682	NA	NA	NA	NA	NA	NA	NA	NA	NA	NA	NA	NA	NA	NA	NA	2914.45	639.803	59.7565	turquoise
AT1G10690	0.668	0.000562344	0.201361	NA	0.522523	1	11536625	55.7325	3.7701e-08	1.36e-09	17	2907	0	0.000152203	562.365	1986.56	166.371	38.0499	brown
AT1G10700	0.654	0.00127668	0.116262	NA	0.458738	2	11532441	57.4845	3.80809e-08	1.37e-09	927	49	0	0.0373041	21.9562	2774.82	860.833	22.8044	black
AT1G10710	0.446536	0.00134942	0.754405	NA	0.44381	2	11528187	55.9083	3.76111e-08	1.37e-09	420	22	0	0.000815257	202.164	1766.7	6.30388	78.6197	blue
AT1G10715	NA	0.000662429	NA	2.2012	0.37931	1	11525396	49.5614	3.75366e-08	1.37e-09	3211	2813	0	0.00054199	609.915	NA	NA	NA	NA
AT1G10717	0.7215	0.00560835	0.798975	0.669916	0.406593	1	11524365	59.5373	3.75366e-08	1.37e-09	2328	3844	0	0.017015	379.863	NA	NA	NA	NA
AT1G10720	0.632692	0.00203181	0.205215	1.37023	0.427907	1	11523704	52.0143	3.74985e-08	1.37e-09	32	4505	0	0.0136585	55.1443	2808.59	755.158	16.5152	grey60
AT1G10730	0.5434	0.00162076	NA	1.70009	0.438228	1	11521288	55.6524	3.7379e-08	1.37e-09	130	2615	0	0.0225412	36.5113	2060.59	226.281	30.085	yellow
AT1G10740	0.550891	0.00201515	0.141959	NA	0.447961	4	11518640	56.8479	3.73947e-08	1.37e-09	2110	0	0.105748	0.0472335	24.3912	2925.5	1587.15	34.3118	brown
AT1G10745	0.8666	0.00474905	0.69073	1.8925	0.385542	1	11513871	60.679	3.73839e-08	1.37e-09	0	1553	0	0.0211264	340.918	NA	NA	NA	NA
AT1G10747	0.566571	0.00292255	0.480814	1.6638	0.40873	1	11512233	54.4687	3.73972e-08	1.37e-09	630	350	0	0.00244307	999.728	NA	NA	NA	NA
AT1G10750	0.5915	0.00465435	0.0978899	2.11119	0.43661	2	11511738	53.5514	3.73587e-08	1.37e-09	1125	0	0.0379683	0.000529821	734.872	2882.81	76.6729	34.4874	green
AT1G10760	0.680763	0.00242694	0.183859	NA	0.439286	3	11505715	54.7031	3.71154e-08	1.37e-09	7148	5500	0	0.0354075	19.9606	3090.27	11831.4	73.4416	blue
AT1G10770	0.8184	0.00265323	0.191362	NA	0.507937	1	11494912	52.0795	3.7157e-08	1.37e-09	12482	16303	0	0.00498439	449.722	2236.76	14.8496	174.253	blue
AT1G10780	0.766867	0.00234115	0.262192	NA	0.443922	2	11493865	55.6337	3.71624e-08	1.37e-09	9842	15162	0	0.0419955	24.3461	3062.16	92.2047	40.5775	green
AT1G10790	0.403687	0.00229001	0.703472	4.15568	0.436202	1	11490281	56.1964	3.71624e-08	1.37e-09	7215	12535	0	0.00587883	103.357	1231.54	24.2124	72.2937	blue
AT1G10800	0.5704	0.00513662	0.127438	NA	0.427567	2	11488476	56.6215	3.71641e-08	1.37e-09	6177	11497	0	0.0207966	104.868	1711.4	10.431	54.2787	turquoise
AT1G10810	0.56	0.000770618	0.207529	NA	0.453074	3	11487462	56.1723	3.71641e-08	1.37e-09	4185	9505	0	0.0332725	40.3124	1959.64	29.324	45.7667	turquoise
AT1G10820	0.673471	0.00134142	0.243639	NA	0.441441	2	11485635	57.3577	3.70798e-08	1.37e-09	0	5306	0	0.0464291	24.2108	2599.03	563.169	14.4005	blue
AT1G10830	0.4912	0.000550525	0.127988	NA	0.452899	3	11481033	56.7993	3.70506e-08	1.37e-09	373	2802	0	0.00318513	136.62	3089.45	869.963	22.9103	black
AT1G10840	0.657	0.000701462	0.0354242	NA	0.447732	2	11478914	53.5747	3.69697e-08	1.37e-09	2492	0	0.0787006	0.0192329	30.0753	2429.44	2832.27	14.0777	tan
AT1G10850	0.8206	0.0019323	0.100905	0.345776	0.481426	1	11475055	54.7302	3.67755e-08	1.38e-09	6351	33	0	0.0189193	42.7408	2884.65	418.789	28.9201	green
AT1G10865	1	0.00744632	0.12118	NA	0.453704	2	11472032	50.2504	3.67172e-08	1.38e-09	9374	0	0.080735	0.00955835	87.4534	2070.9	374.295	26.4962	purple
AT1G10870	0.589522	0.00663148	0.104779	NA	0.416133	2	11469935	57.5019	3.66868e-08	1.38e-09	6471	221	0	0.0544088	15.9719	2544.56	715.06	15.7506	turquoise
AT1G10875	NA	0.00312133	NA	19.2602	0.382838	1	11462547	58.4514	3.6615e-08	1.37e-09	4855	7609	0	0.00154259	217.72	NA	NA	NA	NA
AT1G10880	0.644024	0.00280583	0.181408	1.09705	0.491817	1	11460922	56.8359	3.6615e-08	1.37e-09	3195	9234	0	0.00161558	224.17	NA	NA	NA	NA
AT1G10890	0.597562	0.00142895	NA	NA	0.453287	4	11458899	50.1043	3.66385e-08	1.37e-09	0	7087	0	0.0446415	23.8972	2448.54	1611.77	21.7956	grey60
AT1G10900	0.655783	0.00157571	0.0889657	NA	0.421634	3	11454413	54.5372	3.63539e-08	1.37e-09	1728	645	0	0.0256313	36.8347	3424.88	1683.65	28.952	brown
AT1G10910	0.559875	0.00131861	0.207952	NA	0.413534	2	11446710	59.3447	3.63253e-08	1.38e-09	9431	0	0.0163106	0.0430226	20.9142	2997.26	1288.18	18.8395	orange
AT1G10920	0.519273	0.00151168	NA	NA	0.413462	5	11442365	59.3631	3.63995e-08	1.38e-09	13776	0	0.029681	0.0059969	99.6717	3427.45	680.921	32.8774	lightyellow
AT1G10930	0.636087	0.00107206	0.251298	1.30087	0.425287	1	11438669	57.4523	3.63995e-08	1.37e-09	16908	0	0.0259923	0.0455939	14.313	2575.7	492.302	33.2219	green
AT1G10940	0.97275	0.00120071	0.0565609	NA	0.451613	2	11430872	55.8807	3.6346e-08	1.37e-09	13981	0	0.0302721	0.0256871	31.0667	2619.3	2782.04	15.6024	cyan
AT1G10950	1	0.000605917	0.0434526	NA	0.444633	1	11427341	56.2801	3.6368e-08	1.37e-09	8329	0	0.118554	0.0439292	16.6807	3226.38	3692.91	13.8644	yellow
AT1G10960	NA	0.00054487	0.149608	NA	0.53915	1	11422358	49.315	3.63828e-08	1.37e-09	7553	0	0.590164	0.000149201	516.243	3384.19	5287.86	60.6862	brown
AT1G10970	0.768667	0.000865908	0.13617	NA	0.484444	2	11421458	53.5577	3.6428e-08	1.37e-09	5454	689	0	0.0405458	29.9777	2426.62	202.794	47.8109	blue
AT1G10980	0.527143	0.00109496	0.40918	1.35256	0.439072	1	11419321	54.3566	3.64088e-08	1.37e-09	2658	2826	0	0.00084085	190.527	NA	NA	NA	NA
AT1G10990	NA	0.00255906	NA	NA	0.462867	2	11416302	54.7691	3.63093e-08	1.37e-09	1402	4930	0	0.000181131	449.025	2328.28	106.884	65.2301	blue
AT1G11000	0.7425	0.000998147	0.0540525	NA	0.429152	3	11414789	56.1867	3.63233e-08	1.37e-09	0	0	0.00296939	0.00583675	72.2413	2777.11	306.07	35.6333	turquoise
AT1G11020	0.502333	0.00102138	0.036527	0.421647	0.444099	1	11409854	56.698	3.63709e-08	1.37e-09	3679	0	0.0564731	0.0249374	58.8148	2443.01	506.798	14.9871	lightgreen
AT1G11040	0.68313	0.00413755	0.0813613	0.892458	0.465452	1	11407564	53.9369	3.64344e-08	1.37e-09	5969	100	0	0.0171037	77.0333	NA	NA	NA	NA
AT1G11050	0.813	0.00253712	0.1333	0.719929	0.444089	1	11404866	52.407	3.64502e-08	1.37e-09	8667	0	0.0345243	0.0204357	92.2883	2771.01	814.098	57.9044	purple
AT1G11060	0.507316	0.00101664	0.321396	2.90741	0.433584	1	11401977	59.3472	3.64502e-08	1.37e-09	11556	2804	0	0.0507508	15.4277	3047.87	481.487	14.1846	yellow
AT1G11070	0.482737	0.00159064	0.352586	NA	0.438643	5	11396533	51.3219	3.64095e-08	1.37e-09	17000	7987	0	0.00600626	89.7949	1693.57	37.4899	139.099	greenyellow
AT1G11080	0.743231	0.000822139	0.150611	NA	0.438844	2	11392217	55.4005	3.64213e-08	1.37e-09	17106	4174	0	0.00196182	174.568	2167.64	121.878	239.183	turquoise
AT1G11090	0.008333	0.0001419	0.143127	NA	0.45641	1	11383937	57.5127	3.64433e-08	1.37e-09	11340	0	0.00426621	0.000569651	360.511	2203.44	293.115	23.167	brown
AT1G11100	0.445987	0.00094752	0.490131	NA	0.431681	5	11382873	56.2202	3.64433e-08	1.37e-09	5533	1060	0	0.018445	36.6982	2916.2	37.7891	66.1655	turquoise
AT1G11110	0.315286	0.00140404	0.893133	NA	0.460967	3	11376337	53.8528	3.6489e-08	1.37e-09	2616	6986	0	0.00124597	178.05	NA	NA	NA	NA
AT1G11112	0.424167	0.00197174	0.583958	NA	0.417722	1	11373574	54.4004	3.65142e-08	1.37e-09	1384	5754	0	0.000161456	636.552	2242.44	11.4496	84.9003	green
AT1G11120	0.951458	0.00472464	NA	NA	0.446809	2	11371461	53.0109	3.65142e-08	1.37e-09	0	1830	0	0.000457836	233.032	3416.83	47.414	64.0788	turquoise
AT1G11125	0.629857	0.00224841	0.46086	2.39086	0.491228	1	11367893	55.349	3.65387e-08	1.37e-09	3443	0	0.127858	0.000144452	408.125	3400.5	29.0465	64.5694	turquoise
AT1G11130	0.672933	0.00110079	0.115069	1.49986	0.445167	2	11363837	54.3469	3.65665e-08	1.37e-09	1055	3069	0	0.0313468	30.4552	2299.51	381.713	31.8584	green
AT1G11145	0	0.00108616	NA	NA	0.437628	1	11359013	58.8454	3.6579e-08	1.37e-09	339	7893	0	0.00424284	175.549	NA	NA	NA	NA
AT1G11150	NA	NA	NA	NA	NA	NA	NA	NA	NA	NA	NA	NA	NA	NA	NA	1015.46	92.8357	142.434	greenyellow
AT1G11160	0.649	0.00248195	0.350218	NA	0.433464	4	11353501	55.0371	3.65767e-08	1.37e-09	2631	483	0	0.0354215	24.4635	2350.74	69.2155	41.0284	green
AT1G11170	0.64	0.00189942	0.266967	NA	0.424628	9	11345881	55.7601	3.65943e-08	1.37e-09	10251	87	0	0.0109202	83.3177	3097.45	92.5829	63.7332	blue
AT1G11175	NA	NA	NA	NA	NA	NA	NA	NA	NA	NA	NA	NA	NA	NA	NA	1698	628.177	126.194	cyan
AT1G11180	0.668882	0.00257257	0.111103	NA	0.454139	3	11340771	54.9934	3.66988e-08	1.37e-09	8866	133	0	0.0115072	77.6027	2529.49	302.454	46.5977	cyan
AT1G11185	NA	NA	NA	NA	NA	NA	NA	NA	NA	NA	NA	NA	NA	NA	NA	2229.72	62.6558	93.2339	purple
AT1G11190	0.558222	0.00159738	0.0549384	3.93247	0.423747	1	11336479	57.6256	3.67193e-08	1.37e-09	4643	4234	0	0.000756852	244.924	2277.64	86.414	37.6092	darkgreen
AT1G11200	0.679217	0.00525113	0.0899163	0.170278	0.420045	1	11333332	56.3769	3.67411e-08	1.37e-09	1765	1356	0	0.0313774	31.0393	2081.42	344.619	21.3321	blue
AT1G11210	0.656929	0.00369799	0.214155	0.42767	0.476807	1	11330877	53.869	3.67542e-08	1.37e-09	425	16	0	0.000254066	334.563	2889.17	871.536	100.303	blue
AT1G11220	0.472031	0.00417778	0.348275	NA	0.489775	2	11326683	52.8718	3.67571e-08	1.37e-09	442	2448	0	0.000321921	311.693	2418.29	70.6248	70.9161	blue
AT1G11230	0.560609	0.00595913	NA	NA	0.448343	2	11323277	58.3638	3.66032e-08	1.37e-09	112	129	0	0.00229945	768.849	NA	NA	NA	NA
AT1G11240	0.658	0.00433629	0.336477	0.906403	0.472637	1	11319791	46.8151	3.66267e-08	1.37e-09	1170	1767	0	0.00802081	93.6172	2205.05	576.775	34.4315	grey60
AT1G11250	0.864333	0.00151492	0.0303569	NA	0.453735	1	11318024	55.3677	3.66561e-08	1.37e-09	867	3493	0	0.00135915	524.045	NA	NA	NA	NA
AT1G11260	0.795	0.00378226	0.0187393	0.0680951	0.511791	1	11309309	55.8393	3.67613e-08	1.37e-09	0	0	0.111761	0.00135018	166.869	2679.35	10102.6	82.6138	blue
AT1G11270	0.432384	0.00206829	0.749713	NA	0.445686	3	11306159	50.2554	3.67799e-08	1.37e-09	0	1474	0	0.00467763	212.844	1163.15	177.211	55.4835	blue
AT1G11280	0.622052	0.00306018	0.2602	NA	0.421982	5	11299227	56.8667	3.68962e-08	1.37e-09	0	0	0.0420122	0.00700154	176.135	849.615	606.485	86.2999	brown
AT1G11290	0.552892	0.00359479	0.179066	1.63055	0.435802	1	11295377	56.0958	3.68615e-08	1.37e-09	261	34	0	0.00665473	115.695	2548.84	182.447	27.3018	orange
AT1G11300	0.655542	0.00517161	0.140701	NA	0.430775	2	11292302	56.2312	3.6985e-08	1.37e-09	3336	3109	0	0.0291882	39.4507	2740.09	695.984	34.431	lightyellow
AT1G11303	NA	0.00157505	NA	1.40039	0.429963	1	11288878	55.8296	3.6985e-08	1.37e-09	6760	3192	0	0.0175698	55.772	NA	NA	NA	NA
AT1G11310	0.740812	0.00241777	0.275271	NA	0.434869	3	11286045	54.535	3.70056e-08	1.37e-09	9593	0	0.0511516	0.0280027	34.5039	2844.36	4659.31	31.9067	red
AT1G11320	0.648659	0.0063336	0.361246	1.46472	0.437647	1	11279723	55.2447	3.71181e-08	1.37e-09	15915	983	0	0.0125386	94.7489	2204.52	141.212	39.8047	brown
AT1G11330	0.716686	0.0092646	0.107005	NA	0.415579	3	11276750	54.428	3.70409e-08	1.37e-09	11485	0	0.0998755	0.0120259	60.0157	2957.3	1406.93	41.7716	red
AT1G11340	0.567182	0.00109905	0.274293	NA	0.442446	3	11272638	56.396	3.70409e-08	1.36e-09	7874	3584	0	0.0146311	65.1009	1918.56	111.586	35.2208	yellow
AT1G11350	0.6594	0.000919753	0.299436	0.877545	0.45006	1	11269121	55.325	3.70409e-08	1.36e-09	4407	7101	0	0.071249	20.5471	2389.37	1679.49	30.9946	red
AT1G11360	0.593667	0.00155859	0.108726	NA	0.493827	4	11265439	56.0413	3.70409e-08	1.36e-09	2206	8353	0	0.000377378	292.327	2660.69	806.009	26.2107	blue
AT1G11362	0.537435	0.00896321	NA	5.10988	0.358559	1	11262035	59.521	3.70409e-08	1.36e-09	63	6210	0	0.000343725	661.603	2224.51	11.5612	163.64	blue
AT1G11370	0.4527	0.00599185	NA	1.52695	0.483276	1	11258694	58.3741	3.71655e-08	1.36e-09	0	373	0	0.0589475	97.3827	NA	NA	NA	NA
AT1G11380	0.530692	0.00192081	0.117696	40.9238	0.453595	1	11253982	56.3158	3.72855e-08	1.36e-09	4645	72	0	0.0133869	65.796	2312.34	493.964	52.4943	darkred
AT1G11390	0.6349	0.000912645	0.139095	0.213635	0.4336	1	11252113	55.4661	3.7345e-08	1.36e-09	6514	0	0.0579353	0.0556512	16.8611	3375.53	397.315	16.5564	turquoise
AT1G11400	0.594571	0.00180229	0.306807	NA	0.463415	6	11248851	53.3704	3.73721e-08	1.36e-09	9776	0	0.062695	0.0161517	59.1559	2667.66	614.239	21.2275	grey60
AT1G11410	0.526381	0.00107374	0.185055	NA	0.426729	4	11245668	58.2198	3.7421e-08	1.36e-09	6701	2529	0	0.0431807	43.5248	3597.79	581.581	40.473	brown
AT1G11420	0.293211	0.00119082	0.673715	NA	0.413774	1	11242084	59.2546	3.75525e-08	1.36e-09	4224	52	0	0.0112296	66.3211	2566.58	68.1922	57.3429	green
AT1G11430	0.831333	0.000833886	0.0892649	1.72414	0.470672	1	11239325	56.853	3.75869e-08	1.36e-09	1956	0	0.169077	0.0171482	48.1925	3080.43	2831.44	18.5631	black
AT1G11440	0.3612	0.00140082	0.435103	2.96473	0.415751	1	11237344	46.436	3.76413e-08	1.36e-09	445	0	0.211726	0.000747424	413.037	2974.63	475.465	26.7244	greenyellow
AT1G11450	0.562125	0.00198432	0.330362	NA	0.405405	5	11233361	51.6286	3.77819e-08	1.36e-09	1241	3874	0	0.00329761	837.981	2600.57	182.029	67.2649	turquoise
AT1G11460	0.652389	0.00289093	NA	72.2105	0.400394	1	11229603	54.12	3.77819e-08	1.36e-09	4999	2799	0	0.0221653	190.66	893.577	5.2155	205.674	turquoise
AT1G11470	0.467667	0.0069491	0.892719	2.94182	0.472406	1	11226883	48.8474	3.77819e-08	1.36e-09	7719	1660	0	0.0014145	720.023	NA	NA	NA	NA
AT1G11475	NA	0.00444015	NA	NA	0.444444	1	11224146	55.1054	3.77819e-08	1.36e-09	10456	0	0.024463	0.00181079	189.807	1966.24	579.888	27.9995	tan
AT1G11480	0.60925	0.00152386	0.625733	NA	0.467473	2	11222502	52.5514	3.79165e-08	1.36e-09	12100	1604	0	0.0359229	33.0861	3139.47	1857.94	15.8851	turquoise
AT1G11482	NA	NA	NA	NA	NA	NA	NA	NA	NA	NA	NA	NA	NA	NA	NA	1348.72	6.33488	69.612	brown
AT1G11490	0.565652	0.00543285	0.230785	NA	0.417122	2	11217661	51.6965	3.79719e-08	1.36e-09	16941	6445	0	0.00180883	185.122	1642.53	10.307	60.3716	green
AT1G11500	0.735615	0.00410298	0.458452	NA	0.435088	3	11215866	52.1638	3.79719e-08	1.36e-09	18736	6989	0	0.0116279	114.476	2065.25	21.6868	45.192	black
AT1G11510	0.50996	0.00482504	NA	NA	0.415486	2	11214822	52.5134	3.79719e-08	1.36e-09	19780	5762	0	0.00136929	235.526	NA	NA	NA	NA
AT1G11520	0.497727	0.00698413	NA	3.71713	0.428088	1	11213516	58.8974	3.79719e-08	1.36e-09	21067	5072	0	0.000438055	400.41	NA	NA	NA	NA
AT1G11530	0.6665	0.00996771	0.140491	0.249021	0.411765	1	11212149	58.9306	3.79719e-08	1.36e-09	19202	3207	0	0.00135289	835.068	2909.6	761.105	40.5779	blue
AT1G11540	0.654	0.00701786	NA	NA	0.458241	2	11211103	50.6434	3.79719e-08	1.36e-09	17363	1368	0	0.00408739	583.869	2188.06	12.5411	110.307	turquoise
AT1G11545	0.757552	0.00432891	0.0550045	0.218376	0.482571	1	11208050	56.5756	3.80594e-08	1.36e-09	14295	0	0.316289	0.000210153	288.402	2981.44	793.223	57.2596	green
AT1G11560	0.610605	0.00811351	0.259612	1.32968	0.431202	1	11204918	56.7236	3.82652e-08	1.35e-09	11867	0	0.0561609	0.00605655	151.217	NA	NA	NA	NA
AT1G11570	0.594556	0.00363872	NA	NA	0.431673	4	11203378	48.8071	3.82652e-08	1.35e-09	10557	21	0	0.00165807	351.229	1581.24	19.1147	50.2402	turquoise
AT1G11572	NA	0.00436724	0.299749	0.128398	0.444444	1	11202203	59.803	3.82652e-08	1.35e-09	9726	0	0.0549273	0.00125326	423.347	NA	NA	NA	NA
AT1G11580	0.706161	0.00387694	0.100443	NA	0.460564	2	11197935	55.8838	3.8275e-08	1.35e-09	3862	2138	0	0.016054	159.452	2447.36	2840.98	51.2863	brown
AT1G11590	0.544936	0.00319781	NA	3.06434	0.44	1	11193965	58.6309	3.83368e-08	1.35e-09	9	6108	0	0.394976	19.6725	NA	NA	NA	NA
AT1G11591	NA	0.00399122	NA	1.93779	0.407233	1	11191415	49.0651	3.82231e-08	1.35e-09	0	8658	0	0.0430948	158.469	NA	NA	NA	NA
AT1G11592	NA	NA	NA	NA	NA	NA	NA	NA	NA	NA	NA	NA	NA	NA	NA	3046.83	274.86	46.5565	midnightblue
AT1G11593	0.7245	0.00195708	NA	16.1273	0.338596	1	11188543	59.7306	3.82225e-08	1.35e-09	0	11193	0	0.426433	16.9445	NA	NA	NA	NA
AT1G11600	0.707688	0.00187414	0.0682498	1.06709	0.484671	1	11184595	57.1476	3.81277e-08	1.35e-09	3782	5907	0	0.00121468	250.909	2304.5	122.022	106.268	green
AT1G11608	0.4388	0.00415899	NA	3.69077	0.392157	1	11180966	53.2927	3.8183e-08	1.36e-09	3101	2984	0	0.0105855	112.333	NA	NA	NA	NA
AT1G11610	0.780229	0.00388443	NA	NA	0.427723	2	11179683	59.1087	3.823e-08	1.36e-09	581	464	0	0.00727752	120.479	NA	NA	NA	NA
AT1G11620	0.526562	0.0024598	0.406659	2.11526	0.400183	1	11175712	56.0663	3.83743e-08	1.36e-09	71	906	0	0.00416583	173.536	NA	NA	NA	NA
AT1G11630	0.4125	0.00105678	0.175893	4.30409	0.423645	1	11173791	55.9282	3.83743e-08	1.36e-09	1992	0	0.0642523	0.00540135	118.259	2351.66	268.212	19.1253	magenta
AT1G11650	0.655846	0.00189547	0.0990871	NA	0.486043	2	11171771	54.0547	3.83182e-08	1.36e-09	434	0	0.0167147	0.0359214	23.986	2098.2	6732.25	11.487	greenyellow
AT1G11655	NA	0.000447712	0.429775	NA	0.45614	1	11167308	55.3816	3.85201e-08	1.36e-09	54	4406	0	0.00185563	237.792	2923.23	2.4	106.544	turquoise
AT1G11660	0.604033	0.00167719	0.129757	NA	0.431065	4	11166067	57.0692	3.86724e-08	1.36e-09	765	5647	0	0.0656013	13.3004	2329.95	1039.08	13.2152	blue
AT1G11670	0.761292	0.00535572	0.0382561	0.0347733	0.466931	1	11158430	56.3098	3.86586e-08	1.35e-09	262	11622	0	0.000749339	249.927	2239.52	711.35	56.9317	turquoise
AT1G11680	0.7291	0.00124513	0.0594768	0.265969	0.451261	1	11148123	51.3052	3.86542e-08	1.34e-09	1276	2452	0	0.044208	43.4194	3002.28	2590.73	12.7881	turquoise
AT1G11684	NA	0.000358581	NA	NA	0.409091	1	11145442	61	3.8615e-08	1.34e-09	3279	1864	0	0.00256952	312.728	NA	NA	NA	NA
AT1G11690	0.4572	0.002871	0.466818	6.62788	0.408602	1	11145076	53.8257	3.8615e-08	1.34e-09	2526	1111	0	0.0190119	98.8234	NA	NA	NA	NA
AT1G11700	0.825	0.00551988	0.10969	0.32485	0.564356	1	11140961	56.3364	3.86267e-08	1.34e-09	659	0	0.183986	0.000244719	408.779	2978.31	640.567	59.27	pink
AT1G11710	0.363273	0.00120562	0.348302	NA	0.395643	2	11137831	54.9354	3.84723e-08	1.34e-09	3789	0	0.192366	0.0130501	73.2681	2737.83	63.5984	31.3113	magenta
AT1G11720	0.719577	0.00331092	0.224822	NA	0.422527	2	11135179	57.726	3.82879e-08	1.34e-09	3408	0	0.0160239	0.0738363	15.7305	3420.53	2157.31	23.7568	salmon
AT1G11730	0.591125	0.00121221	0.247433	9.54834	0.415584	1	11129261	58.1906	3.82462e-08	1.34e-09	0	5828	0	0.00946435	68.98	1622.47	68.0512	42.4706	green
AT1G11735	NA	NA	NA	NA	NA	NA	NA	NA	NA	NA	NA	NA	NA	NA	NA	2759.78	10.986	92.3233	turquoise
AT1G11740	0.577852	0.00195048	0.29879	4.18117	0.482171	1	11123491	59.0204	3.84102e-08	1.34e-09	2537	11598	0	0.000289539	235.045	2575.99	57.7302	74.8628	green
AT1G11750	0.674118	0.00134528	0.0515132	NA	0.448992	2	11119069	51.8122	3.84102e-08	1.34e-09	6959	11208	0	0.0338739	27.2822	3769.5	3532.79	19.1151	black
AT1G11755	0.8132	0.000737837	0.151846	0.552833	0.413072	1	11116864	58.7618	3.84102e-08	1.34e-09	9164	9174	0	0.0194539	48.3811	2006.01	228.679	15.6802	blue
AT1G11760	0.206	0.00130417	NA	NA	0.467105	1	11114559	51.2263	3.84801e-08	1.34e-09	11469	7791	0	0.0189101	71.8824	1963.22	180.988	16.7653	tan
AT1G11765	0.7235	0.000957926	NA	NA	0.381643	1	11112671	60.0776	3.83674e-08	1.34e-09	13357	6491	0	0.000277741	603.083	NA	NA	NA	NA
AT1G11770	0.5135	0.000973193	0.0874977	1.285	0.468032	1	11110938	56.9801	3.83674e-08	1.34e-09	15090	3706	0	0.00499913	147.272	NA	NA	NA	NA
AT1G11780	0.79425	0.000833392	0.233772	0.183874	0.415222	1	11109706	59.4976	3.84323e-08	1.34e-09	16322	1848	0	0.021582	62.0094	1917.93	318.064	17.3264	magenta
AT1G11785	NA	0.00116651	NA	6.96574	0.439716	1	11106722	61	3.84395e-08	1.34e-09	19306	6	0	0.282775	43.6892	1375.55	9.3907	165.528	turquoise
AT1G11790	0.734158	0.00221333	0.161438	NA	0.437659	2	11105392	56.7147	3.84478e-08	1.34e-09	20636	0	0.0327022	0.0746161	12.702	3180.53	627.84	30.9369	salmon
AT1G11800	0.488889	0.00097536	0.204538	8.15971	0.45098	1	11101361	57.4995	3.84478e-08	1.34e-09	24667	3899	0	0.0304512	35.46	1341.54	389.561	23.9366	brown
AT1G11810	0.6164	0.00150741	0.743624	19.7839	0.422399	1	11096782	55.9534	3.88512e-08	1.34e-09	24195	2451	0	0.00277232	193.506	NA	NA	NA	NA
AT1G11820	0.682333	0.000968454	0.0712608	NA	0.424579	3	11095518	49.3669	3.86366e-08	1.34e-09	21554	0	0.0712421	0.0245648	41.7175	2582.05	1522.81	25.0083	black
AT1G11840	0.873643	0.00497249	0.179136	NA	0.439628	6	11091387	51.3807	3.8677e-08	1.33e-09	17296	0	0.123932	0.0175001	48.0049	2917.61	10765.2	39.6963	skyblue
AT1G11850	0.622133	0.0114016	NA	NA	0.570175	4	11087388	44.023	3.8677e-08	1.33e-09	15237	617	0	0.00785625	217.906	2339.89	305.257	54.9539	salmon
AT1G11860	0.817909	0.00300375	0.0440501	NA	0.465409	3	11085432	55.3988	3.8677e-08	1.33e-09	11513	0	0.104704	0.0161509	50.0347	3889.45	24324.9	32.41	salmon
AT1G11870	0.792867	0.0051708	0.0935317	NA	0.457605	6	11082788	58.4398	3.8677e-08	1.33e-09	8246	431	0	0.0527052	23.0352	2387.96	1387	30.9397	black
AT1G11880	0.596833	0.000144123	0.212604	NA	0.421769	3	11078840	58.1096	3.87128e-08	1.33e-09	4800	0	0.0279289	0.038626	35.6438	1403.67	269.07	23.8004	turquoise
AT1G11890	0.783286	0.00595607	0.031525	NA	0.427702	1	11075788	56.2156	3.85476e-08	1.33e-09	2157	0	0.0123509	0.0247105	33.816	2930.76	1161.51	15.3376	brown
AT1G11900	0.547176	0.00550462	0.200512	1.08167	0.402174	1	11073424	52.3601	3.85837e-08	1.33e-09	573	2336	0	0.0478788	52.0519	1591.65	72.8	22.1591	blue
AT1G11905	0.684438	0.00692337	0.0493704	NA	0.453453	2	11071763	56.1039	3.85837e-08	1.33e-09	0	3997	0	0.0228615	64.0468	1966.15	459.682	26.9826	red
AT1G11910	0.743895	0.00550995	0.0895328	NA	0.456242	2	11069833	54.3435	3.85818e-08	1.33e-09	1187	0	0.0240074	0.031936	29.1655	3017.26	16793.4	25.4842	yellow
AT1G11915	0.750826	0.00755173	0.0798228	0.538236	0.442424	1	11064795	54.6794	3.84786e-08	1.33e-09	6225	360	0	0.00203544	239.625	1778.62	20.738	42.0235	turquoise
AT1G11920	0.735467	0.00578284	0.111986	0.488708	0.452814	1	11063012	55.7079	3.84297e-08	1.33e-09	8008	2143	0	0.0142946	186.377	NA	NA	NA	NA
AT1G11925	0.865857	0.00588198	NA	1.81031	0.425532	1	11060615	57.8885	3.84958e-08	1.33e-09	10405	4540	0	0.0019361	357.744	NA	NA	NA	NA
AT1G11930	0.658822	0.00258148	0.105211	NA	0.455993	2	11057950	56.2118	3.85416e-08	1.33e-09	13070	7205	0	0.0234049	37.1023	2708.7	1674.13	17.7766	cyan
AT1G11940	0.798219	0.00429024	0.208883	NA	0.429688	2	11055011	58.3328	3.85227e-08	1.33e-09	16009	9773	0	0.0228291	37.8352	2189.16	178.127	29.5327	green
AT1G11950	0.689836	0.00653931	0.245112	NA	0.412861	3	11052066	54.55	3.84326e-08	1.33e-09	18954	4863	0	0.040273	27.1797	2860.68	240.122	45.7682	blue
AT1G11960	0.676125	0.00325227	0.105251	NA	0.430052	3	11046979	58.2657	3.84165e-08	1.33e-09	24041	0	0.0265566	0.0390018	46.1768	1915.12	975.955	91.44	purple
AT1G11970	0.325143	0.00136697	NA	4.31319	0.413333	1	11042175	56.288	3.84165e-08	1.33e-09	26709	0	0.363333	0.000973721	810.162	NA	NA	NA	NA
AT1G11980	0.388556	0.00811006	NA	33.3502	0.421941	1	11040926	46.3598	3.83989e-08	1.33e-09	25523	1141	0	0.00164949	428.016	NA	NA	NA	NA
AT1G11990	0.754651	0.00366293	0.125919	NA	0.440457	2	11040466	56.2595	3.83519e-08	1.33e-09	22238	1601	0	0.0107943	96.01	2069.83	16.6775	79.2071	brown
AT1G12000	0.851788	0.00182684	0.110276	0.0174427	0.462081	1	11036649	52.346	3.85238e-08	1.33e-09	17507	0	0.012827	0.0294629	28.9965	2978.61	2004.16	22.665	green
AT1G12010	0.642304	0.00552336	0.122635	0.964863	0.445483	1	11030380	56.3974	3.88066e-08	1.33e-09	13410	0	0.0121951	0.00386858	937.853	1713.49	11.8465	544.92	turquoise
AT1G12020	0.459778	0.00343991	0.232339	6.96764	0.475771	1	11025182	52.645	3.88253e-08	1.33e-09	7829	967	0	0.144301	44.2471	2092.63	249.71	34.6092	brown
AT1G12030	0.822933	0.00348758	0.238748	1.10805	0.493243	1	11022060	60.9009	3.88043e-08	1.33e-09	5034	0	0.121505	0.000587741	354.096	2382.66	86.6	178.698	turquoise
AT1G12040	0.644565	0.00149976	0.21285	0.895423	0.497539	1	11016553	53.8992	3.87441e-08	1.33e-09	0	5251	0	0.00341413	125.662	2210.85	40.8434	241.493	turquoise
AT1G12050	0.6452	0.00529849	0.0982527	1.71062	0.461295	1	11013804	57.5423	3.87167e-08	1.33e-09	685	5096	0	0.016527	51.614	2568.69	1635.58	28.7402	blue
AT1G12060	0.780235	0.00535732	0.554066	0.962528	0.478395	1	11010319	59.0671	3.89336e-08	1.33e-09	4170	4073	0	0.000612091	577.244	1533.19	118.481	45.1564	turquoise
AT1G12064	0.622	0.00133789	NA	1.53133	0.545455	1	11009047	59.93	3.88274e-08	1.33e-09	4199	3208	0	0.00153197	534.938	2600.79	4.51628	265.532	turquoise
AT1G12070	0.836778	0.00360315	0.162954	0.516511	0.465116	1	11007998	58.0655	3.88301e-08	1.33e-09	2058	1067	0	0.000247907	547.412	1470.8	3.46047	106.093	green
AT1G12080	0.137333	0.000827621	0.40483	NA	0.510791	2	11002383	58.2272	3.87852e-08	1.33e-09	1137	463	0	0.000729772	312.723	2331.22	902.949	88.3039	green
AT1G12090	0.4905	0.00158656	0.0259348	NA	0.519324	1	10996881	53.2232	3.87005e-08	1.33e-09	85	0	0.0427136	0.00133859	401.491	3320.43	21555.8	54.4699	cyan
AT1G12100	0.762778	0.00202164	NA	2.50238	0.443609	1	10991299	53.7555	3.86595e-08	1.33e-09	752	695	0	0.00658121	754.993	1768.32	25.662	76.3737	black
AT1G12110	0.123	0.00119936	0.0677904	NA	0.487874	1	10981322	57.2888	3.90238e-08	1.33e-09	388	0	0.121032	0.00109644	182.01	2499.94	5019.06	56.8071	turquoise
AT1G12120	0.417692	0.00154185	0.438459	4.19319	0.427686	1	10971871	56.2516	3.88052e-08	1.33e-09	1552	80	0	0.0541949	28.0637	2960.36	1530.14	25.2631	cyan
AT1G12130	0.642563	0.00917073	0.250626	1.58935	0.457183	1	10967951	56.43	3.89247e-08	1.33e-09	5472	4000	0	0.00147177	419.795	1977.98	12.7473	228.271	darkgrey
AT1G12140	0.788944	0.00140083	0.118842	NA	0.465942	3	10965260	53.995	3.91032e-08	1.33e-09	5222	6691	0	0.0225058	55.63	2566.72	1315.21	16.9038	brown
AT1G12150	0.660727	0.00161465	0.115446	NA	0.442016	2	10963015	54.7782	3.90313e-08	1.33e-09	4166	8936	0	0.00277705	189.456	2073.41	32.2791	45.7444	turquoise
AT1G12160	0.577187	0.00296916	0.221226	1.42537	0.479033	1	10960555	56.6312	3.89574e-08	1.33e-09	1507	11396	0	0.0120111	137.309	1889.78	33.8155	240.195	turquoise
AT1G12170	0.5155	0.00322672	1.74204	3.2063	0.377169	1	10957938	60.5061	3.886e-08	1.33e-09	116	10357	0	0.00529626	300.434	NA	NA	NA	NA
AT1G12180	0.478231	0.00641755	1.43873	3.26577	0.502778	1	10956149	59.1349	3.886e-08	1.33e-09	207	8890	0	0.00117774	398.162	NA	NA	NA	NA
AT1G12190	0.448472	0.00589157	0.465014	2.93645	0.370567	1	10953578	59.8422	3.87439e-08	1.33e-09	24	5964	0	0.00234291	495.738	NA	NA	NA	NA
AT1G12200	0.786075	0.00555151	0.122269	NA	0.494993	2	10949034	57.6182	3.85892e-08	1.33e-09	163	0	0.038142	0.00291334	249.897	3252.66	598.848	79.189	turquoise
AT1G12210	0.551486	0.00838458	NA	NA	0.413093	3	10946329	59.3324	3.87411e-08	1.33e-09	2868	58	0	0.0152065	63.8001	1727.97	227.025	54.1289	red
AT1G12211	NA	NA	NA	NA	0.425703	1	10945670	52.3134	3.86869e-08	1.33e-09	3527	717	0	6.35e-05	1374.16	NA	NA	NA	NA
AT1G12220	NA	NA	NA	NA	0.411985	3	10942288	58.1641	3.8869e-08	1.33e-09	6909	3821	0	0.0169994	103.926	1258.29	286.929	113.017	red
AT1G12230	0.656493	0.00764231	NA	NA	0.464174	2	10938583	56.4789	3.90771e-08	1.33e-09	10614	704	0	0.0233015	51.4613	2688.5	2902.11	28.9316	lightcyan
AT1G12240	0.628351	0.00803101	0.112778	0.590054	0.485714	1	10932904	55.2585	3.90867e-08	1.33e-09	12170	0	0.0635435	0.0143921	226.128	2653.25	5715.17	39.2382	brown
AT1G12244	0.601556	0.00117168	0.2372	0.748059	0.424837	1	10928891	56.006	3.90905e-08	1.33e-09	10777	0	0.0868629	0.000205391	409.585	3595.81	308.583	34.393	salmon
AT1G12250	0.624857	0.00138599	0.105841	NA	0.480427	3	10927318	53.8666	3.90905e-08	1.33e-09	8317	1453	0	0.00179386	193.47	3539.72	2819.32	32.2629	salmon
AT1G12260	0.491444	0.00157764	0.0691774	NA	0.430976	2	10923719	55.8444	3.90969e-08	1.32e-09	3895	5052	0	0.00997548	160.781	2690.73	60.5876	38.6041	darkgreen
AT1G12270	0.6105	0.00122709	0.403118	4.24014	0.452007	1	10914510	51.0549	3.99297e-08	1.32e-09	1498	0	0.0148368	0.0251498	26.5067	3703.95	1354.86	16.5837	magenta
AT1G12280	0.586132	0.00253836	0.320563	NA	0.410801	2	10911670	57.8721	3.99491e-08	1.32e-09	4338	2801	0	0.0298454	46.3475	2232.53	375.482	24.729	pink
AT1G12290	0.584472	0.00203135	NA	NA	0.408286	4	10908628	58.6651	4.02844e-08	1.32e-09	7380	73	0	0.0448497	19.0924	2828.08	248.265	33.0277	red
AT1G12300	0.705556	0.00258505	NA	1.4799	0.407001	1	10903535	55.2078	4.12485e-08	1.32e-09	7679	219	0	0.0347961	26.6658	1826.15	138.671	29.9427	turquoise
AT1G12310	0.672875	NA	NA	NA	0.514541	1	10899892	52.9739	4.1375e-08	1.32e-09	5693	0	0.476281	NA	NA	2593.83	1843.01	20.973	tan
AT1G12320	0.624875	0.00291903	0.223428	1.41855	0.458529	1	10899921	51.0917	4.1949e-08	1.32e-09	3584	0	0.202474	0.000225193	624.896	2105.53	200.609	46.2882	pink
AT1G12330	0.619667	0.000598619	0.0346214	0.25494	0.475626	1	10892125	56.929	4.2039e-08	1.32e-09	63	0	0.0218884	0.000366267	197.2	2783.09	607.809	32.8307	midnightblue
AT1G12340	NA	0.000712704	NA	NA	0.425641	1	10889149	53.0818	4.20125e-08	1.32e-09	3039	884	0	0.020289	139.299	NA	NA	NA	NA
AT1G12350	0.389	0.00147722	0.147251	NA	0.416143	2	10888208	55.5642	4.20657e-08	1.32e-09	3980	1825	0	0.0142852	34.1762	1512.4	700.879	28.9441	cyan
AT1G12360	0.925556	0.00107244	0.0438356	0.177191	0.428786	1	10885681	55.7216	4.11509e-08	1.32e-09	2678	4352	0	0.0491018	17.0245	2737.33	2571.72	18.0668	red
AT1G12370	0.728019	0.0069471	0.18741	NA	0.448021	3	10880185	57.0512	4.08228e-08	1.31e-09	165	2704	0	0.0265605	52.7333	3044.27	114.862	49.3638	royalblue
AT1G12380	0.783412	0.000712792	0.0526049	0.408214	0.466415	1	10872287	54.1518	4.09776e-08	1.31e-09	4651	0	0.0633914	0.0110581	92.3903	2841.85	220.07	33.7076	skyblue
AT1G12390	NA	0.00490349	0.12585	NA	0.427536	1	10866501	51.5116	4.0566e-08	1.31e-09	10437	0	0.0914773	0.00728312	130.338	1098.53	244.15	47.4552	turquoise
AT1G12400	0.872857	0.0104343	0.0570067	NA	0.380342	3	10864766	56.4403	4.06664e-08	1.31e-09	12172	1575	0	0.000139462	611.672	2027.91	149.04	29.9329	turquoise
AT1G12410	0.7758	0.00659573	0.0388744	0.163407	0.463095	1	10863515	58.7144	4.05617e-08	1.31e-09	13423	0	0.0269663	0.0195485	63.1042	3669.03	3745.68	17.42	black
AT1G12411	NA	0.00403922	NA	NA	0.41358	1	10861224	57.9223	4.07331e-08	1.31e-09	15714	0	0.617284	0.000151179	1113.63	NA	NA	NA	NA
AT1G12420	0.804917	0.000965488	0.13178	NA	0.414027	2	10860306	51.4211	4.07167e-08	1.31e-09	16632	29	0	0.00136108	170.804	2058.7	317.45	40.14	red
AT1G12430	0.822429	0.00101945	0.0896934	NA	0.429967	2	10852828	52.8065	4.10306e-08	1.31e-09	24110	0	0.010632	0.0223446	36.607	2339.48	968.295	18.1437	turquoise
AT1G12440	0.792333	0.00512137	0.131666	NA	0.489152	3	10845124	45.7532	4.0356e-08	1.31e-09	31814	0	0.374793	0.000362042	798.971	2701.96	2581.74	23.7062	lightcyan
AT1G12450	0.321857	0.00199246	0.0925921	6.87061	0.446489	1	10842641	55.2511	4.04455e-08	1.31e-09	34297	0	0.0244019	0.000435133	294.383	2737.1	349.938	34.0844	cyan
AT1G12460	0.49205	0.000950011	0.209468	NA	0.416384	2	10839327	54.4867	3.98059e-08	1.31e-09	37611	879	0	0.055976	17.9493	2858.08	415.752	27.2885	salmon
AT1G12470	0.826	0.00123894	0.160809	0.354576	0.427031	1	10835600	56.251	3.98011e-08	1.31e-09	35398	4606	0	0.0559208	15.136	1863.42	1238.94	21.3553	yellow
AT1G12480	0.771	0.00122321	0.0996613	1.44041	0.43447	1	10829277	57.3644	3.97069e-08	1.31e-09	33490	5729	0	0.0395672	40.6752	2238.08	194.231	36.8877	blue
AT1G12490	NA	NA	NA	NA	0.423985	1	10825762	57.1842	3.92827e-08	1.31e-09	30921	3160	0	0.00264027	212.215	NA	NA	NA	NA
AT1G12500	0.676818	0.00101319	0.0317095	1.96333	0.473297	1	10823395	55.9685	3.93827e-08	1.31e-09	27634	0	0.0637768	0.000254524	320.122	2993.46	1411.08	34.2777	brown
AT1G12520	0.777093	0.00948089	0.221046	NA	0.478712	3	10819471	55.8624	3.93827e-08	1.31e-09	23808	0	0.0288109	0.0198695	68.0251	1248.64	1680.14	59.4731	pink
AT1G12530	0.672588	0.00800915	0.518693	1.4579	0.426117	1	10817559	56.0501	3.94735e-08	1.31e-09	21883	1858	0	0.0326638	41.0348	1756.37	215.203	38.9812	grey60
AT1G12540	0.601042	0.00590615	0.563906	11.2499	0.382429	1	10813657	52.1363	3.95391e-08	1.31e-09	18584	5760	0	0.00119157	1062.79	NA	NA	NA	NA
AT1G12550	0.657207	0.00798264	0.35211	1.05927	0.486626	1	10812014	58.209	3.96415e-08	1.31e-09	16759	5934	0	0.000315762	342.962	3387.41	294.519	39.3083	brown
AT1G12560	0.6711	0.00425821	0.178209	0.306694	0.489227	1	10810040	51.9623	3.98418e-08	1.31e-09	14821	3996	0	0.0010973	333.082	2476.79	18.8915	209.425	turquoise
AT1G12570	0.717239	0.00561217	0.128908	0.280853	0.499127	1	10808598	56.8562	3.95492e-08	1.31e-09	11659	834	0	0.00970929	407.744	2109.09	139.758	111.134	salmon
AT1G12580	0.678167	0.00163452	0.141667	0.476842	0.44232	1	10803751	56.4337	3.99485e-08	1.31e-09	6914	0	0.0476808	0.0572685	18.3655	3544.87	1758	22.969	purple
AT1G12600	0.814818	0.00308564	0.0946506	0.0246245	0.431429	1	10800341	57.6274	4.00949e-08	1.31e-09	3721	133	0	0.00224857	150.387	1463.48	14.0775	69.6159	turquoise
AT1G12610	0.836588	0.00773376	0.118652	0.00783114	0.509524	1	10796662	58.7659	4.05925e-08	1.31e-09	1773	3812	0	0.000582927	692.128	1751.07	113.941	340.01	purple
AT1G12615	NA	NA	NA	NA	0.372428	1	10792490	53.8845	4.10243e-08	1.31e-09	0	7984	0	0.0387578	198.188	NA	NA	NA	NA
AT1G12620	0.641038	0.00721901	NA	4.70454	0.412647	1	10791993	55.2761	4.09207e-08	1.31e-09	364	8481	0	0.0241764	62.4969	1259.71	136.405	40.0335	midnightblue
AT1G12630	0.522667	0.00450421	0.412095	6.96664	0.528497	1	10787879	56.4766	4.08268e-08	1.31e-09	189	12595	0	0.0021921	436.921	1699.51	16.9101	76.4887	blue
AT1G12640	0.813675	0.00573972	0.0544812	0.387637	0.443485	1	10783265	53.0586	4.04256e-08	1.3e-09	4803	17209	0	0.0494295	29.578	2464.28	904.478	25.0116	yellow
AT1G12650	0.7215	0.00706502	0.150395	NA	0.402945	4	10780754	49.9896	4.03858e-08	1.3e-09	3531	18238	0	0.0221953	63.4377	2765.92	530.933	22.4028	grey60
AT1G12660	0.209571	0.00473726	0.455098	NA	0.409836	1	10777602	51.0412	4.02476e-08	1.3e-09	1789	16496	0	0.00072994	423.089	NA	NA	NA	NA
AT1G12663	0.5322	0.00369283	0.71942	1.22828	0.390805	1	10775576	44.2207	3.94836e-08	1.3e-09	19	14726	0	0.000920029	461.091	NA	NA	NA	NA
AT1G12665	0.30225	0.00858303	0.309316	72.2388	0.437037	1	10774214	46.5806	3.92781e-08	1.3e-09	0	13310	0	0.000316572	677.187	NA	NA	NA	NA
AT1G12672	0.6778	0.00511167	NA	1.73356	0.409524	2	10768236	49.8697	3.89958e-08	1.31e-09	5935	7155	0	0.000291541	533.804	2163.16	6.48062	124.422	brown
AT1G12680	0.900654	0.00351733	0.194808	0.245111	0.452937	1	10766668	54.6302	3.90941e-08	1.31e-09	5959	2980	0	0.0251724	37.5326	2260.8	799.443	12.3968	cyan
AT1G12700	0.548138	0.00557322	NA	NA	0.385568	3	10763012	51.1213	3.90084e-08	1.31e-09	2847	0	0.0467487	0.0335262	27.9524	2187.11	139.772	26.7804	blue
AT1G12710	0.470333	0.00409107	0.152178	NA	0.426148	2	10759806	58.0172	3.9065e-08	1.31e-09	608	19	0	0.000711726	260.663	2690.47	685.978	80.3786	blue
AT1G12730	0.421912	0.00236022	0.312852	NA	0.425263	2	10752046	57.8307	3.89678e-08	1.31e-09	106	2406	0	0.0225726	36.389	2636.07	238.629	55.2189	blue
AT1G12740	0.746389	0.00695307	0.0735991	NA	0.412665	4	10744336	56.0944	3.87781e-08	1.31e-09	7816	1746	0	0.00220606	147.834	1636.56	44.1752	481.051	turquoise
AT1G12750	0.592182	0.0085233	0.383634	NA	0.475108	7	10741602	54.1007	3.87751e-08	1.31e-09	10550	0	0.0104408	0.025162	66.8824	1293.17	723.547	47.8081	blue
AT1G12760	0.840815	0.00591754	0.0736192	6.0284	0.479218	2	10738047	55.943	3.8763e-08	1.31e-09	14105	0	0.0432692	0.00843235	70.5621	2847.65	2474.9	20.162	blue
AT1G12770	0.868905	0.0049738	0.0806319	NA	0.455918	2	10735526	56.6149	3.8763e-08	1.31e-09	16626	2414	0	0.0719508	21.2507	3182.74	1551.14	21.2981	black
AT1G12775	0.650128	0.00407785	NA	3.33784	0.409302	1	10732703	56.3852	3.8763e-08	1.31e-09	18667	2693	0	0.0390533	47.3203	1277.1	78.3566	32.7112	black
AT1G12780	0.715	0.00723601	0.172065	1.12187	0.432765	1	10730619	52.676	3.8763e-08	1.31e-09	15702	0	0.0592792	0.00366088	124.991	3224.88	2289.52	44.7819	lightcyan
AT1G12790	0.669524	0.00807125	0.190918	0.541416	0.415671	1	10727650	54.1212	3.873e-08	1.31e-09	13225	98	0	0.00793282	85.3809	2358.02	119.94	85.7163	blue
AT1G12800	0.682519	0.00352776	0.360305	0.282277	0.424479	1	10724994	54.5163	3.86823e-08	1.31e-09	9182	0	0.0287267	0.0379828	25.8705	3803.75	5327.54	27.4561	black
AT1G12805	0.555818	0.00310031	0.475181	4.79487	0.482456	1	10719968	60.8768	3.86779e-08	1.31e-09	7460	0	0.0928571	0.0013709	395.56	NA	NA	NA	NA
AT1G12810	0.012	0.00205276	0.166181	NA	0.501022	2	10719289	49.4989	3.86779e-08	1.31e-09	5774	0	0.0829611	0.000441398	358.209	3618.49	728.688	30.9622	midnightblue
AT1G12820	0.821077	0.00100974	0.0887109	1.44969	0.456171	1	10717785	54.4439	3.86779e-08	1.31e-09	3298	0	0.00118157	0.0472548	35.6868	2676.12	1486.14	26.7193	royalblue
AT1G12830	0.469111	NA	0.375354	NA	0.442368	1	10712296	50.7195	3.86552e-08	1.31e-09	0	0	0.55956	NA	NA	2744.15	355.295	26.1186	grey60
AT1G12840	0.8152	0.00173383	0.144063	0.320554	0.43883	1	10712340	54.5045	3.86662e-08	1.31e-09	0	0	0.129698	0.0299	19.9061	2402.49	3860.93	12.0622	lightgreen
AT1G12845	0.684	0.00178796	NA	0.808452	0.444444	1	10707713	53.0799	3.86662e-08	1.31e-09	2115	3242	0	0.000335093	471.552	3055.06	206.253	77.7891	blue
AT1G12850	0.80395	0.0045239	0.141864	0.262642	0.468801	1	10706851	55.0622	3.85568e-08	1.31e-09	0	4104	0	0.0233807	35.7802	2175.17	1179.62	16.7593	midnightblue
AT1G12855	0.502279	0.00543414	NA	4.51231	0.406767	1	10704385	57.8061	3.8569e-08	1.31e-09	0	6570	0	0.00496308	130.574	NA	NA	NA	NA
AT1G12860	0.811773	0.00418479	0.140777	NA	0.427938	3	10702241	47.2989	3.85659e-08	1.31e-09	2085	7638	0	0.00589436	120.337	3023.09	893.335	28.4043	black
AT1G12870	0.497	0.00435292	NA	1.81423	0.402078	1	10699416	57.8995	3.84873e-08	1.31e-09	4910	5179	0	0.004437	129.741	NA	NA	NA	NA
AT1G12880	0.7358	0.00105819	0.40275	0.232618	0.416667	1	10696867	47.8131	3.84873e-08	1.3e-09	7459	2945	0	0.00532961	145.549	2395.03	225.309	42.4644	brown
AT1G12890	0.411286	0.00138202	NA	2.55978	0.401515	1	10694874	50.9483	3.84873e-08	1.3e-09	9452	1896	0	0.00491338	171.576	2144.97	8.50853	98.4009	purple
AT1G12900	0.632	0.000613033	0.0392897	NA	0.449472	5	10694107	50.3094	3.84873e-08	1.31e-09	10219	0	0.0823004	0.00196695	173.963	4192.33	42347	41.5883	salmon
AT1G12910	0.75725	0.000772296	0.0095593	NA	0.456292	1	10691648	46.2442	3.83673e-08	1.31e-09	9403	358	0	0.000409499	321.906	2438.26	916.318	16.5664	tan
AT1G12920	1	0.000812196	0.00846097	NA	0.422222	1	10690197	50.3676	3.83327e-08	1.31e-09	7501	0	0.0482124	0.012918	79.6422	2765.33	2007.48	15.5165	tan
AT1G12930	0.519176	0.00136052	0.114467	5.53939	0.431412	1	10688223	56.4137	3.83557e-08	1.31e-09	25	0	0.00462711	0.0381765	17.0017	2579.44	817.732	15.6915	yellow
AT1G12940	0.531667	0.00106916	NA	0.621266	0.487078	1	10670230	53.8717	3.85205e-08	1.31e-09	573	384	0	0.00209035	166.02	2053.55	35.5581	179.988	red
AT1G12950	0.859111	0.00329563	NA	0.162592	0.465265	1	10666831	48.1922	3.85149e-08	1.31e-09	3972	165	0	0.0133855	220.752	2797.48	64.5271	173.091	turquoise
AT1G12960	0.669636	0.00402885	NA	1.86832	0.438095	1	10663838	49.6543	3.85149e-08	1.31e-09	6965	2567	0	0.0501588	293.863	NA	NA	NA	NA
AT1G12970	0.465588	0.00273112	0.191694	2.49358	0.460215	1	10663005	55.0368	3.85149e-08	1.31e-09	7798	0	0.0525657	0.0175933	71.5175	1990.29	393.744	21.9949	blue
AT1G12980	0.712714	0.00383914	0.307669	1.41025	0.485309	1	10656827	56.9104	3.84792e-08	1.31e-09	13976	2339	0	0.000255625	335.143	2080.9	3.06822	159.973	turquoise
AT1G12990	0.761667	0.000838121	0.0438781	1.00487	0.43257	1	10652940	50.6149	3.85091e-08	1.31e-09	17863	0	0.0364291	0.0469804	30.6046	3394.83	988.299	40.0091	red
AT1G13000	0.899333	0.000965677	0.119103	NA	0.443615	5	10650444	57.7159	3.85363e-08	1.31e-09	20359	2406	0	0.0477284	20.6984	3078.67	925.597	21.6817	red
AT1G13020	0.513462	0.00133309	0.15023	1.54628	0.5	1	10646141	53.009	3.84285e-08	1.3e-09	16859	0	0.0566038	0.0240959	28.1808	3328.36	1261.15	19.8981	brown
AT1G13030	0.365429	0.00182224	0.447207	3.11085	0.438424	1	10642502	54.8478	3.84425e-08	1.3e-09	13401	129	0	0.0329105	16.6946	2613.88	257.651	24.0682	magenta
AT1G13040	0.686714	0.000873843	0.181587	NA	0.418919	2	10638996	57.7977	3.85001e-08	1.3e-09	10812	3635	0	0.0538184	19.1533	3341.55	66.7349	39.3544	magenta
AT1G13050	0.576	0.00174366	0.20696	NA	0.492662	3	10636832	55.7112	3.85527e-08	1.3e-09	9071	5799	0	0.0597193	20.6606	2927.38	116.268	29.0028	blue
AT1G13060	0.695444	0.00123596	0.0316565	NA	0.458194	3	10634355	52.9122	3.85527e-08	1.3e-09	5913	3500	0	0.0451911	18.1056	2041.97	2890.14	12.9165	blue
AT1G13080	0.603902	0.00505864	0.175875	NA	0.415507	2	10627543	55.1638	3.85692e-08	1.3e-09	0	0	0.0746867	0.0040005	165.071	3038.19	1139.72	68.3539	pink
AT1G13090	0.44135	0.00255933	NA	NA	0.444671	2	10624807	52.2377	3.86011e-08	1.31e-09	426	0	0.0900693	0.00180248	230.05	3570.45	1609.75	25.1878	brown
AT1G13100	0.723038	0.00217341	0.275457	9.26139	0.435845	1	10622686	54.4444	3.86011e-08	1.3e-09	2547	818	0	0.00198665	232.83	2312.71	431.051	28.7905	pink
AT1G13110	0.742667	0.00175445	0.146694	0.190124	0.442904	1	10619451	52.7807	3.85442e-08	1.3e-09	5782	0	0.064433	0.000720426	249.353	2404.69	4965.34	37.4071	red
AT1G13120	NA	0.00573137	0.258078	1.25352	0.42756	1	10617401	55.2766	3.85985e-08	1.3e-09	7832	0	0.0277778	0.0416659	21.5473	2060.52	667.623	16.6555	magenta
AT1G13130	0.5637	0.00127746	0.137018	4.45281	0.45208	1	10611861	58.6977	3.85375e-08	1.31e-09	9460	1255	0	0.0118596	121.545	1820.52	23.0775	76.7952	turquoise
AT1G13140	0.605	0.00125881	0.113716	NA	0.429907	2	10608161	56.0583	3.85072e-08	1.31e-09	7138	4955	0	0.0155022	70.9886	1536.01	37.1953	67.059	blue
AT1G13143	NA	NA	NA	NA	0.419142	1	10607520	59.3728	3.85072e-08	1.31e-09	7756	5596	0	NA	NA	NA	NA	NA	NA
AT1G13145	NA	NA	NA	NA	NA	NA	NA	NA	NA	NA	NA	NA	NA	NA	NA	2377	74.2295	38.7612	lightgreen
AT1G13150	0.8008	0.000494148	0.187144	0.0792614	0.425157	1	10604670	55.9552	3.8502e-08	1.31e-09	3714	8446	0	0.052747	23.4794	1543.33	51.1101	40.6679	blue
AT1G13160	0.608714	0.00151696	0.304075	2.86307	0.432712	1	10601961	54.2687	3.84683e-08	1.31e-09	0	3947	0	0.0700965	13.0972	3470.09	696.326	20.3174	magenta
AT1G13170	0.677429	0.00148069	0.110229	NA	0.43397	2	10598012	55.226	3.8531e-08	1.31e-09	608	0	0.0348247	0.0258801	29.1214	3355.55	693.699	23.9251	green
AT1G13180	0.6956	0.000775668	0.0378453	0.0923773	0.422897	1	10591621	55.0326	3.8671e-08	1.31e-09	996	1925	0	0.0311203	27.3659	2615.84	400.634	20.4892	blue
AT1G13190	0.837	0.00109498	0.160956	0.833095	0.456446	1	10587781	52.1965	3.86464e-08	1.31e-09	4708	5765	0	0.0328883	27.0505	2816.36	1577.67	19.0326	red
AT1G13195	0.9035	0.000756146	0.133018	NA	0.422733	2	10584964	61	3.88282e-08	1.31e-09	2656	8582	0	0.0319325	40.8708	2333.57	286.312	19.3697	lightgreen
AT1G13200	0.64885	0.00393021	0.393601	1.33717	0.423547	1	10579324	59.942	3.89394e-08	1.31e-09	180	5906	0	0.00316382	282.77	NA	NA	NA	NA
AT1G13210	0.818184	0.00387431	0.0703558	0.359183	0.427187	1	10577639	55.7744	3.93582e-08	1.31e-09	0	424	0	0.0542139	32.6032	3037.7	4883.14	52.6804	red
AT1G13220	0.474767	0.00177124	NA	NA	0.418856	3	10571081	52.1851	3.94551e-08	1.31e-09	0	0	0.00949825	0.0268992	23.1815	2349.82	641.307	18.9387	grey60
AT1G13230	0.6042	0.00104528	0.164901	2.52632	0.407843	1	10565986	53.426	3.9997e-08	1.31e-09	528	1546	0	0.00150945	205.063	1362.79	4.0155	84.7014	turquoise
AT1G13245	0.047	0.00158344	NA	NA	0.412698	1	10561131	61	4.01645e-08	1.31e-09	5383	36	0	0.00305398	155.567	1900.44	2101.81	29.9475	turquoise
AT1G13250	0.707455	0.00156023	0.125592	0.236691	0.496146	1	10558060	56.3293	4.05066e-08	1.31e-09	8454	0	0.343498	0.000208517	347.381	2457.72	660.557	33.6013	greenyellow
AT1G13260	0.748071	0.00261105	0.139339	0.927903	0.471498	1	10544377	53.6263	4.04127e-08	1.3e-09	2309	0	0.100388	0.000199727	312.532	3246.65	2158.83	59.3053	purple
AT1G13270	0.762676	0.00603274	0.132102	NA	0.441441	2	10541656	53.3663	3.99463e-08	1.3e-09	0	1187	0	0.025099	47.3105	2912.51	1607.13	53.5729	blue
AT1G13280	0.769235	0.00553588	0.213027	1.00885	0.464052	1	10539157	55.057	3.96681e-08	1.3e-09	979	0	0.100199	0.000188745	374.292	2585.59	1184.12	30.9873	blue
AT1G13290	0.546353	0.00612496	0.140046	1.74202	0.455446	1	10536392	54.9578	3.96849e-08	1.3e-09	3744	1443	0	0.000761927	300.356	NA	NA	NA	NA
AT1G13300	0.71975	0.00209955	0.125068	3.31219	0.477295	1	10529667	55.8542	3.94302e-08	1.3e-09	9548	707	0	0.000428171	325.963	1904.29	37.3023	242.164	turquoise
AT1G13310	0.552279	0.00706679	0.415198	2.27083	0.410667	1	10525517	57.6654	3.93543e-08	1.3e-09	5181	1328	0	0.0127324	114.064	NA	NA	NA	NA
AT1G13320	0.707675	0.00567842	0.113096	NA	0.44161	4	10523117	56.1779	3.93527e-08	1.3e-09	492	3728	0	0.0502669	19.0527	2285.76	2013.1	9.09803	black
AT1G13330	0.512333	0.00340697	0.071291	2.11786	0.399413	1	10518610	53.877	3.92788e-08	1.3e-09	0	6034	0	0.0200257	48.1906	2581.26	29.4326	50.2482	blue
AT1G13340	0.710167	0.00194782	0.39656	1.49671	0.437398	1	10517097	49.3075	3.92887e-08	1.3e-09	996	5403	0	0.0585281	55.2432	2531.84	193.026	100.882	red
AT1G13350	0.53873	0.00133361	NA	NA	0.42475	3	10514241	56.1913	3.92887e-08	1.3e-09	3716	0	0.0181488	0.0304267	35.1295	1174.6	1342.38	32.0461	yellow
AT1G13360	0.455188	0.00162822	0.212682	NA	0.505983	3	10509672	58.5357	3.91253e-08	1.3e-09	2058	0	0.59185	0.000231643	333.786	2134.64	2029.65	32.5155	blue
AT1G13370	0.297714	0.0027365	NA	4.60458	0.476886	1	10498765	43.6621	3.91374e-08	1.3e-09	3481	346	0	0.0110433	541.015	662.894	7.86202	263.748	turquoise
AT1G13380	0.313667	0.00194325	0.0340182	NA	0.458554	1	10497551	56.6125	3.93204e-08	1.3e-09	4016	0	0.0722812	0.0023232	242.496	2868.3	514.171	21.8503	midnightblue
AT1G13390	0.9165	0.0031561	0.359296	NA	0.487759	2	10494241	55.1984	3.94139e-08	1.3e-09	49	0	0.104388	0.000123885	375.801	2001.41	1302.22	35.1934	blue
AT1G13400	NA	0.00425602	NA	0.324474	0.42963	1	10488978	53.6283	3.92723e-08	1.29e-09	1750	3677	0	0.00024841	415.283	2295.56	4.6062	100.766	turquoise
AT1G13410	0.590571	0.0109994	0.308585	5.19353	0.401404	1	10485310	59.3827	3.92723e-08	1.29e-09	5418	6886	0	0.0274588	59.1699	2290.34	39.5612	40.1394	darkturquoise
AT1G13420	0.489784	0.0086236	0.230468	0.933196	0.420683	1	10481857	55.9628	3.9179e-08	1.29e-09	8871	4454	0	0.00365129	197.873	2404.04	59.5349	132.898	turquoise
AT1G13430	0.576333	0.00775508	0.454344	2.10022	0.420455	1	10480045	57.2509	3.9179e-08	1.29e-09	10683	2741	0	0.00164825	213.579	1293	25.6419	174.258	pink
AT1G13440	0.8867	0.00648526	0.0190682	NA	0.47296	2	10478468	41.4468	3.9179e-08	1.29e-09	8847	0	0.127766	0.00145508	183.891	2965.01	29850.3	23.1117	pink
AT1G13448	NA	NA	NA	NA	NA	NA	NA	NA	NA	NA	NA	NA	NA	NA	NA	2693.19	108.164	55.4206	lightcyan
AT1G13450	0.924095	0.00429741	0.141792	NA	0.425061	4	10473814	55.4901	3.91778e-08	1.3e-09	4372	0	0.0194434	0.0182928	35.7334	2396.53	862.366	20.3468	cyan
AT1G13460	0.551	0.00196261	0.0714823	NA	0.396214	2	10470778	54.058	3.96148e-08	1.3e-09	1276	0	0.0436079	0.0424146	31.9879	2256.47	416.577	15.5038	yellow
AT1G13470	0.616909	0.00605243	0.418815	1.5629	0.419298	1	10466444	57.8299	3.95176e-08	1.3e-09	0	18	0	0.0347322	255.123	2221.53	2040.55	174.088	lightyellow
AT1G13480	0.496667	0.00104824	0.279792	7.0274	0.42354	1	10463995	53.5034	4.01234e-08	1.3e-09	2435	422	0	0.0156076	131.358	2266.07	12.6109	157.819	turquoise
AT1G13485	NA	0.00364279	NA	NA	0.304598	1	10462374	61	4.01234e-08	1.3e-09	4056	2043	0	0.000543933	983.231	NA	NA	NA	NA
AT1G13490	0.4862	0.00169001	NA	NA	0.417755	2	10461981	53.1356	4.04158e-08	1.3e-09	4449	2436	0	0.00483946	280.494	NA	NA	NA	NA
AT1G13500	0.322632	0.00320455	NA	8.36781	0.427218	1	10458756	56.6965	4.03924e-08	1.3e-09	7674	5661	0	0.0113826	102.595	3020.59	3.34419	103.73	turquoise
AT1G13510	0.407538	0.00149979	NA	26.2819	0.433071	1	10457342	57.8036	4.07038e-08	1.3e-09	9088	7075	0	0.0063651	157.769	2753.74	6.93023	134.079	turquoise
AT1G13520	0.707571	0.000729213	NA	NA	0.431271	1	10454912	56.9695	4.07038e-08	1.3e-09	11518	9505	0	0.00327635	130.362	2331.45	53.9674	242.055	turquoise
AT1G13530	0.420833	0.000599159	0.225002	NA	0.420553	1	10452955	55.9548	4.07038e-08	1.3e-09	13475	11462	0	0.00722708	124.333	1606.76	29.4698	173.389	turquoise
AT1G13540	0.3755	0.00153144	0.42988	1.2303	0.434555	1	10451082	54.7897	4.07573e-08	1.3e-09	14754	13335	0	0.00228442	234.671	1523.41	23.0388	125.722	turquoise
AT1G13550	0.543	0.00357561	NA	2.65769	0.409597	1	10449561	57.0479	4.07573e-08	1.3e-09	13229	14856	0	0.0225993	58.207	1863.88	11.8667	144.188	turquoise
AT1G13560	0.69924	0.00512246	0.033913	NA	0.437607	3	10448077	53.7066	4.07659e-08	1.3e-09	9369	13565	0	0.0509145	19.1143	2778.18	2150.65	17.2603	brown
AT1G13570	0.51475	0.00311238	0.237338	NA	0.409273	3	10444421	57.1299	4.09793e-08	1.3e-09	7137	11333	0	0.0250312	88.0319	2789.86	407.133	26.2821	turquoise
AT1G13580	1	0.00208576	0.060106	NA	0.395325	3	10442024	57.1212	4.15637e-08	1.3e-09	4417	8613	0	0.0280809	36.9958	2296.7	320.188	22.3884	lightgreen
AT1G13590	1	0.00168126	0.214696	NA	0.382576	1	10438730	61	4.15637e-08	1.3e-09	2493	6689	0	0.000274197	490.705	2574.76	16.5798	161.595	turquoise
AT1G13600	0.492	0.00106096	0.180577	NA	0.42132	1	10435939	48.682	4.15637e-08	1.3e-09	10	4206	0	0.000454134	494.051	2252.53	16.5643	94.4934	green
AT1G13605	0	0.0016753	1.12458	NA	0.400641	1	10428007	57.0015	4.09382e-08	1.3e-09	0	1274	0	0.0131744	88.9027	NA	NA	NA	NA
AT1G13607	NA	0.000670518	0.970891	NA	0.374429	1	10425767	61	4.04763e-08	1.29e-09	0	3514	0	0.000420784	545.278	NA	NA	NA	NA
AT1G13608	0.2	0.00276954	NA	NA	0.405063	1	10424863	61	4.04521e-08	1.3e-09	887	4418	0	0.000139743	763.567	1777.69	11.4698	192.211	turquoise
AT1G13609	NA	0.00155908	0.184936	NA	0.421941	2	10423847	54.9458	4.04521e-08	1.3e-09	1903	5434	0	0.000752277	484.501	1942.3	539.53	169.254	turquoise
AT1G13610	0.584423	0.00127257	0.24141	NA	0.436397	2	10422714	56.2517	4.04521e-08	1.3e-09	3036	6567	0	0.00262373	147.967	1868.13	9.72248	149.021	turquoise
AT1G13620	0.735667	0.00161583	0.510099	NA	0.409091	2	10418179	55.8223	4.01853e-08	1.3e-09	7571	6957	0	0.000390448	420.254	2795.85	4.36124	101.891	turquoise
AT1G13630	0.543912	0.00117885	0.44415	NA	0.397035	6	10417120	57.5878	4.01853e-08	1.3e-09	8630	3355	0	0.0336289	26.2804	2758.52	90.262	29.795	magenta
AT1G13635	0.152	0.00172391	0.23821	NA	0.404915	2	10412393	56.8632	3.99844e-08	1.3e-09	6542	0	0.0244321	0.00163621	240.249	2241.42	18.3349	81.0066	turquoise
AT1G13640	0.564	0.0013184	0.17269	NA	0.448368	2	10409541	54.5855	3.99844e-08	1.3e-09	3164	0	0.0244841	0.0274147	36.6936	3066.42	1227.95	37.0621	turquoise
AT1G13650	0.242818	0.00302084	0.874649	NA	0.426249	4	10406255	46.3936	3.99844e-08	1.3e-09	644	0	0.061634	0.0447545	267.635	2161.73	640.285	190.301	brown
AT1G13670	0.5326	0.00170123	0.246976	0.18765	0.457227	1	10398527	60.6345	4.00375e-08	1.3e-09	536	7130	0	0.000283109	386.626	2688.46	115.276	67.8156	green
AT1G13680	0.527778	0.00172325	0.234553	1.55846	0.415946	1	10396252	57.9453	4.00375e-08	1.3e-09	49	3554	0	0.000416957	295.919	NA	NA	NA	NA
AT1G13690	0.9025	0.00187617	0.10948	1.07551	0.477528	1	10393263	53.557	3.99719e-08	1.3e-09	3038	1985	0	0.00601929	136.621	2499.17	579.885	18.258	tan
AT1G13700	0.615714	0.0018564	0.121739	NA	0.458488	3	10392173	58.6684	3.98963e-08	1.3e-09	4128	372	0	0.0162249	79.3682	3116.48	560.857	54.0348	lightcyan
AT1G13710	0.530625	0.000742084	0.121935	0.423523	0.46139	1	10383888	52.6525	3.86659e-08	1.3e-09	1873	4577	0	0.000120186	367.252	2608.77	47.1984	151.045	turquoise
AT1G13730	0.55725	0.000715983	0.298695	NA	0.442113	2	10376788	52.8161	3.85403e-08	1.3e-09	1291	0	0.148491	0.0437974	26.0877	2282.6	812.367	22.4982	brown
AT1G13740	0.3455	0.00072847	0.161376	NA	0.457498	1	10373112	56.8617	3.84973e-08	1.3e-09	4967	0	0.112911	0.0114971	96.2849	2166.35	351.653	34.431	darkred
AT1G13750	0.582143	0.00161116	0.167265	0.88382	0.434853	1	10371151	54.1005	3.84497e-08	1.3e-09	6928	1739	0	0.0120854	74.9261	2186.63	482.589	56.067	lightyellow
AT1G13755	0.1345	0.00118182	0.365939	NA	0.402778	1	10367872	53.4236	3.84263e-08	1.3e-09	10207	5018	0	0.000555048	635.557	NA	NA	NA	NA
AT1G13760	NA	0.0035585	NA	3.18159	0.414141	1	10366302	60.6594	3.84263e-08	1.3e-09	11777	6588	0	0.0676386	158.974	NA	NA	NA	NA
AT1G13770	0.385917	0.00059315	0.182573	NA	0.424036	4	10364971	55.5729	3.84263e-08	1.3e-09	13108	7919	0	0.0175114	31.72	2968	431.197	18.4846	blue
AT1G13780	0.706333	0.00105843	0.518948	NA	0.401896	2	10362001	59.4583	3.84263e-08	1.3e-09	16078	7222	0	0.0537572	31.1856	1232.62	216.445	33.0774	turquoise
AT1G13790	0.605154	0.0012603	0.403168	NA	0.424242	2	10359775	53.1909	3.84479e-08	1.3e-09	17732	3355	0	0.0262451	40.4619	2092.18	187.324	49.6781	green
AT1G13800	0.5666	0.000775169	0.389437	NA	0.397059	2	10356150	58.3141	3.80484e-08	1.3e-09	14288	0	0.0258993	0.0465505	25.7102	2199.91	37.4062	38.2983	magenta
AT1G13805	NA	NA	NA	NA	0.347826	1	10355558	61	3.8339e-08	1.3e-09	17102	2725	0	NA	NA	NA	NA	NA	NA
AT1G13810	0.544286	0.000887224	NA	NA	0.428795	1	10352554	56.2975	3.79301e-08	1.3e-09	12704	0	0.0102529	0.0513863	62.1771	2440.79	174.986	27.699	magenta
AT1G13820	0.647	0.00169658	0.130781	7.84389	0.443137	1	10351071	58.2511	3.79301e-08	1.3e-09	10247	1469	0	0.0194623	45.0154	3909.82	1436.89	34.2845	salmon
AT1G13825	NA	0.00328025	0.0536577	NA	0.442623	2	10348104	55.9373	3.80497e-08	1.3e-09	8812	4436	0	0.125051	72.0134	NA	NA	NA	NA
AT1G13830	0.7256	0.00109493	0.196086	NA	0.459119	2	10346852	57.8941	3.81578e-08	1.3e-09	6968	5688	0	0.000623087	336.258	2774.32	66.0651	108.009	turquoise
AT1G13860	0.572735	0.000803891	0.272554	NA	0.413907	5	10343341	56.6495	3.8286e-08	1.3e-09	1201	0	0.0135891	0.0357177	23.0077	1854.55	604.933	28.3235	blue
AT1G13870	0.598727	0.00186793	0.0952531	1.64829	0.429043	1	10339359	54.8333	3.8286e-08	1.3e-09	0	0	0.0270088	0.00643514	163.875	1839.64	391.434	12.7025	brown
AT1G13880	0.690286	0.00103914	0.250462	NA	0.42682	3	10337714	53.0369	3.8286e-08	1.3e-09	424	0	0.0507488	0.0240161	47.7887	2190.78	859.913	14.9387	darkred
AT1G13890	0.519875	0.00141855	0.106675	NA	0.417929	2	10335113	47.1089	3.8286e-08	1.3e-09	3025	2480	0	0.00241616	203.291	NA	NA	NA	NA
AT1G13900	0.588727	0.000850614	0.127096	0.584144	0.437341	1	10333446	55.4948	3.82779e-08	1.3e-09	4692	0	0.0367475	0.00566152	127.006	2195.03	826.226	17.1912	yellow
AT1G13910	0.63925	0.00105953	0.278119	NA	0.411883	2	10330768	58.4585	3.8358e-08	1.3e-09	7370	14	0	0.00514666	75.7446	2547.93	163.205	24.5127	blue
AT1G13920	0.506	0.000988914	0.298032	NA	0.438306	7	10328461	47.8834	3.83603e-08	1.3e-09	9462	0	0.00139211	0.00364418	148.389	2113.38	128.343	58.8199	blue
AT1G13930	0.851	0.00100395	NA	NA	0.525641	3	10325588	46.3994	3.86851e-08	1.3e-09	7034	0	0.0614035	0.000223522	332.078	2757.41	10609.1	72.1499	blue
AT1G13940	0.657905	0.000691918	0.390824	NA	0.420477	2	10324066	52.4485	3.9055e-08	1.3e-09	2848	1418	0	0.0204792	54.588	2880.07	581.533	19.6923	yellow
AT1G13950	0.741667	0.00161106	0.0610166	NA	0.444444	1	10313111	53.0046	3.87626e-08	1.31e-09	2530	0	0.0559254	0.000305352	314.017	1775.83	299.051	53.3322	blue
AT1G13960	0.714409	0.000733049	0.168923	NA	0.466667	2	10310262	54.6231	3.87626e-08	1.31e-09	5379	0	0.0697897	0.0285474	30.2781	2792.05	892.329	18.8308	blue
AT1G13970	0.749935	0.00251607	0.0506443	1.52979	0.4033	1	10307194	53.7843	3.84366e-08	1.31e-09	2557	2850	0	0.0115218	70.2187	1597.68	68.4465	76.9999	turquoise
AT1G13980	0.732531	0.00223383	0.0420155	NA	0.429982	2	10298082	56.4714	3.8069e-08	1.31e-09	414	0	0.0114664	0.0571363	12.8039	3339.71	1607.05	19.3268	yellow
AT1G13990	0.875643	0.00220031	0.177159	NA	0.466019	3	10291881	56.3761	3.79289e-08	1.31e-09	6615	247	0	0.00502346	108.2	2806.41	1261.11	41.1512	blue
AT1G14000	0.869	0.00130006	0.0386699	0.0365291	0.447229	1	10289187	54.9884	3.78769e-08	1.31e-09	9309	0	0.038961	0.0336516	22.3275	3818.09	2096.47	14.3032	brown
AT1G14010	0.511429	0.00119732	0.235931	4.87559	0.455399	1	10286376	59.5248	3.78359e-08	1.31e-09	12120	35	0	0.02815	39.231	2448.18	781.211	20.4464	green
AT1G14020	0.605154	0.00199683	0.240647	0.701065	0.451333	1	10283825	57.3209	3.7866e-08	1.31e-09	9155	685	0	0.0174527	45.1379	2846.63	427.834	15.0381	turquoise
AT1G14030	0.20925	0.000845885	0.183884	NA	0.447205	1	10281239	56.3244	3.77512e-08	1.31e-09	7013	3271	0	0.0234282	53.1582	3548.48	1044.89	26.0869	black
AT1G14040	0.802625	0.00461072	NA	0.865314	0.434889	1	10276430	55.9976	3.76101e-08	1.3e-09	0	8080	0	0.0220896	31.0488	2974.42	195.786	72.247	turquoise
AT1G14048	0.687	0.0018498	NA	NA	0.454248	1	10270862	56.7067	3.74954e-08	1.3e-09	696	13648	0	0.00208845	390.099	NA	NA	NA	NA
AT1G14060	0.2585	0.00158024	0.415157	NA	0.455556	1	10269617	40.4939	3.74954e-08	1.3e-09	1941	14893	0	0.00215977	198.8	3001.63	295.789	29.7033	magenta
AT1G14070	0.757947	NA	NA	NA	NA	NA	NA	NA	NA	NA	NA	NA	NA	NA	NA	2260.43	293.048	31.7514	blue
AT1G14071	NA	NA	NA	NA	NA	NA	NA	NA	NA	NA	NA	NA	NA	NA	NA	1596.22	2.97209	89.1135	blue
AT1G14080	0.642842	0.00453835	0.152424	1.79478	0.431846	1	10264106	56.6379	3.74465e-08	1.3e-09	5382	15194	0	0.0459196	60.7293	2810.79	54.6729	106.644	turquoise
AT1G14090	NA	NA	NA	NA	NA	NA	NA	NA	NA	NA	NA	NA	NA	NA	NA	1116.86	123.029	51.7512	magenta
AT1G14100	0.618091	0.00475036	NA	1.60857	0.415216	1	10258584	54.0985	3.73952e-08	1.3e-09	209	10021	0	0.00564764	428.562	1222.59	40.2357	120.495	brown
AT1G14110	0.586234	0.00652653	0.168152	1.12131	0.421053	1	10256248	56.0438	3.7411e-08	1.3e-09	108	7693	0	0.0654311	168.363	NA	NA	NA	NA
AT1G14120	0.44885	0.00488341	0.236417	NA	0.42279	3	10253149	60.3113	3.741e-08	1.3e-09	361	4519	0	0.00475513	140.184	2144.37	144.778	170.79	turquoise
AT1G14130	0.770556	0.00246619	0.252051	1.08477	0.435814	1	10250821	59.1835	3.741e-08	1.3e-09	108	1837	0	0.0264403	61.6209	1993.15	311.884	35.8599	turquoise
AT1G14140	0.469667	0.00109859	0.138156	NA	0.471678	1	10248618	51.3545	3.74996e-08	1.3e-09	2311	0	0.0152314	0.0229627	30.1049	2513.94	362.628	17.9229	tan
AT1G14150	0.6705	0.00508996	0.142852	NA	0.47644	2	10246744	59.7811	3.73262e-08	1.3e-09	4185	0	0.056696	0.000645805	312.683	3612.12	1667.61	34.5904	salmon
AT1G14160	1	0.00283725	0.169972	0.0854894	0.44127	1	10245983	55.9259	3.73278e-08	1.3e-09	4823	704	0	0.00952986	119.728	2795.17	14.1953	170.107	turquoise
AT1G14170	0.654636	0.00322732	0.107029	NA	0.411111	3	10243361	53.7086	3.72958e-08	1.3e-09	758	3326	0	0.0191793	58.3224	3013.5	424.62	58.4384	blue
AT1G14180	0.61868	0.00618088	0.257528	NA	0.444126	2	10239383	52.9678	3.73057e-08	1.3e-09	432	495	0	0.0290083	38.0415	2634.36	152.809	26.4812	green
AT1G14185	0.709692	0.0037163	NA	1.69618	0.429233	1	10236428	56.8164	3.71821e-08	1.3e-09	3387	0	0.0590909	0.00910762	106.751	2110.66	33.169	91.5787	turquoise
AT1G14190	0.707492	0.00915466	0.194016	NA	0.428936	2	10234023	54.3424	3.71821e-08	1.3e-09	5792	956	0	0.0405	84.1651	2091.26	66.586	36.7101	green
AT1G14200	0.642318	0.00841838	0.248121	0.857349	0.474074	1	10232321	51.9923	3.71821e-08	1.3e-09	7494	0	0.0234962	0.000268646	404.605	1709.03	504.408	35.3156	pink
AT1G14205	0.746875	0.00254974	0.256218	1.31317	0.417647	1	10231012	54.253	3.71821e-08	1.3e-09	8803	20	0	0.0366618	35.6403	2734.71	99.8527	33.9456	lightcyan
AT1G14210	0.58325	0.00165411	0.281012	2.70857	0.424731	1	10229767	56.8358	3.72146e-08	1.3e-09	10048	1265	0	0.0250554	52.6855	3299.46	470.226	33.0658	turquoise
AT1G14220	0.750714	0.00228305	0.176391	0.686194	0.42067	1	10228095	55.5244	3.72146e-08	1.3e-09	11720	2937	0	0.00125773	303.016	2910.2	7.75039	132.666	turquoise
AT1G14230	0.587636	0.00167981	0.405494	1.88331	0.423942	1	10225377	55.0295	3.74946e-08	1.3e-09	7986	5655	0	0.00998475	63.8623	2850.03	584.273	22.1166	yellow
AT1G14240	0.516262	0.00212131	0.400087	NA	0.424931	4	10221664	57.671	3.74946e-08	1.3e-09	4069	9156	0	0.00347293	555.721	2766.11	67.2217	141.88	turquoise
AT1G14250	0.64688	0.00290303	NA	1.51128	0.425358	1	10218199	54.7459	3.78106e-08	1.3e-09	592	5679	0	0.00617822	113.58	1899.4	2851.55	143.84	salmon
AT1G14260	0.601	0.00209362	0.168676	NA	0.441103	3	10213689	56.5908	3.79595e-08	1.29e-09	172	2260	0	0.0111739	89.7833	1920.99	41.0124	57.9013	red
AT1G14270	0.372727	0.00121354	0.161216	NA	0.453861	4	10211670	56.2976	3.75239e-08	1.29e-09	2191	0	0.0377834	0.0123133	67.1713	3470.61	1598.59	22.6009	black
AT1G14280	0.542	0.00200365	0.23084	0.350801	0.41535	1	10209039	54.6526	3.74326e-08	1.29e-09	4822	0	0.099889	0.0059149	126.931	2748.83	2065.99	38.2343	greenyellow
AT1G14290	0.53	0.00174405	0.124886	NA	0.410256	2	10206515	57.2349	3.72072e-08	1.29e-09	7346	0	0.143113	0.0142409	54.0685	2786.46	1031.16	48.6924	lightcyan
AT1G14300	0.785	0.00202442	0.120375	NA	0.426808	2	10204209	55.8274	3.71715e-08	1.29e-09	7459	40	0	0.0247639	38.205	2090.85	481.67	22.2865	magenta
AT1G14310	0.619	0.0020434	0.241021	1.72925	0.445752	1	10201594	50.8595	3.71715e-08	1.29e-09	5484	1247	0	0.0258448	39.2694	2709.75	329.543	21.9227	black
AT1G14315	0.366083	0.00149027	NA	11.7516	0.424594	2	10199777	55.7369	3.72246e-08	1.29e-09	4344	107	0	0.00367298	166.775	NA	NA	NA	NA
AT1G14320	0.8227	0.00193066	NA	NA	0.476621	2	10198431	43.8231	3.71907e-08	1.29e-09	2573	0	0.0483972	0.000792864	268.879	2651.58	11239	20.5937	tan
AT1G14330	0.953375	0.00174695	0.145893	NA	0.426848	1	10196476	55.3868	3.72302e-08	1.29e-09	0	982	0	0.00375666	202.701	2084.76	472.178	29.5522	darkred
AT1G14340	0.608786	0.00409641	0.211834	0.819316	0.446259	1	10189199	56.1249	3.70561e-08	1.29e-09	4291	2292	0	0.0365993	65.9063	1889.31	515.654	21.1542	lightgreen
AT1G14345	0.745929	0.00228743	NA	0.60762	0.473773	1	10187500	51.1753	3.70501e-08	1.29e-09	5990	3991	0	0.000167609	444.794	3422.65	1942.29	37.5066	salmon
AT1G14350	0.63375	0.00135224	0.18135	NA	0.408085	4	10178658	54.9162	3.71376e-08	1.29e-09	0	1950	0	0.0010211	200.549	1963.69	408.826	31.5939	pink
AT1G14360	0.769333	0.00111085	0.0270842	1.14123	0.450803	1	10175452	56.8421	3.70318e-08	1.29e-09	2642	0	0.0240964	0.00559298	110.948	1918.67	572.741	34.8032	red
AT1G14370	0.693714	0.00111694	0.100376	1.85996	0.434817	1	10171054	55.9407	3.6775e-08	1.29e-09	7040	2148	0	0.0252587	48.8208	3105.28	830.921	47.141	purple
AT1G14380	0.384786	0.000972468	0.581727	NA	0.43609	7	10168535	50.4004	3.6775e-08	1.29e-09	9336	0	0.0432889	0.0223958	40.2047	2833.18	1151.2	21.8319	blue
AT1G14390	0.736941	0.00154984	0.261014	1.14603	0.42021	1	10162508	54.4595	3.66634e-08	1.3e-09	4104	1688	0	0.0178571	47.4817	3374.96	53.693	67.3975	turquoise
AT1G14400	0.874667	0.0018632	NA	NA	0.472767	2	10160059	58.3811	3.66634e-08	1.3e-09	2206	0	0.072196	0.0204214	32.4452	3049.82	4668.74	17.2434	lightcyan
AT1G14410	0.4945	0.000722628	0.223413	2.86255	0.450758	1	10157624	58.2268	3.66202e-08	1.29e-09	0	0	0.0231481	0.00386704	126.299	2028.29	568.971	19.2004	orange
AT1G14420	0.309	0.00103185	0.213212	NA	0.451449	1	10155060	56.6499	3.66234e-08	1.29e-09	399	834	0	0.00663067	145.864	NA	NA	NA	NA
AT1G14430	0.4675	0.00125756	0.149487	2.71153	0.507375	1	10152425	56.7047	3.66186e-08	1.29e-09	3034	0	0.205783	0.000194593	260.816	2558.03	133.602	49.434	green
AT1G14440	0.5478	0.000883711	0.0876866	NA	0.445154	2	10147791	46.379	3.66225e-08	1.29e-09	3789	2733	0	0.000138181	345.068	3133.84	252.584	37.6514	green
AT1G14450	0.645	0.00258009	NA	NA	0.482993	2	10140353	53.4847	3.64431e-08	1.29e-09	812	0	0.086545	0.00366221	182.257	2019.48	1000.24	22.4178	lightgreen
AT1G14453	NA	0.00140116	NA	NA	0.5	1	10139424	60.6224	3.64431e-08	1.29e-09	1741	802	0	8.32e-05	1222.7	NA	NA	NA	NA
AT1G14455	0.43425	0.00196315	1.66576	0.582581	0.435374	1	10138726	53.5671	3.64349e-08	1.29e-09	2439	1500	0	0.000173176	1133.96	2318.53	3.3907	112.084	turquoise
AT1G14460	0.595161	0.00147124	0.200502	4.26321	0.415398	1	10137907	53.6436	3.64349e-08	1.29e-09	3258	609	0	0.014179	48.5348	2130.3	556.625	20.0193	yellow
AT1G14470	0.673552	0.00456959	0.282203	1.40391	0.423906	1	10132508	55.9744	3.64746e-08	1.28e-09	8657	44	0	0.0416515	33.8402	2691.44	37.9643	45.3994	darkturquoise
AT1G14480	0.514046	0.00428641	NA	NA	0.437406	2	10130314	58.4905	3.64481e-08	1.28e-09	8480	2238	0	0.0591484	28.0714	2159.82	116.54	64.4066	purple
AT1G14490	0.609	0.00466946	0.502242	NA	0.556047	2	10128100	51.1228	3.64305e-08	1.28e-09	7027	4452	0	0.000268541	399.432	2340.86	23.6915	65.4879	turquoise
AT1G14500	0.574065	0.00673115	NA	1.78646	0.439359	1	10126237	55.7178	3.63879e-08	1.29e-09	4756	6315	0	0.0291934	39.7876	1800.13	2.51938	134.867	turquoise
AT1G14510	NA	0.0013126	0.117263	NA	0.455863	1	10124951	50.5025	3.63758e-08	1.29e-09	2041	5818	0	0.0125545	44.2629	3322.13	1408.88	17.1478	magenta
AT1G14520	0.660114	0.00593238	0.109027	NA	0.419103	4	10118411	56.0447	3.63339e-08	1.29e-09	1118	22	0	0.0023087	181.423	2475.42	302.637	104.801	blue
AT1G14530	0.854038	0.00826653	0.105941	NA	0.429705	2	10115687	55.0994	3.62414e-08	1.29e-09	3842	22	0	0.025527	37.8637	2052.25	196.206	29.3327	turquoise
AT1G14540	0.6225	0.00540145	0.0883833	0.295043	0.46097	1	10112524	52.9041	3.62391e-08	1.29e-09	7005	73	0	0.001402	383.155	2154.82	68.7302	127.987	red
AT1G14550	0.733667	0.00119307	0.0797375	1.40504	0.453416	1	10107623	57.4855	3.62854e-08	1.29e-09	7298	2560	0	0.00674272	236.416	NA	NA	NA	NA
AT1G14560	0.835	0.000878013	0.0568213	NA	0.453815	3	10105921	57.5118	3.6296e-08	1.29e-09	4397	4251	0	0.029454	33.544	2347.66	562.822	11.9118	pink
AT1G14570	0.728389	0.00119088	0.137804	NA	0.474058	4	10103056	55.0856	3.65569e-08	1.29e-09	389	243	0	0.0440872	19.6203	1938.24	2107.33	12.4934	blue
AT1G14580	0.6655	0.00108138	0.411258	NA	0.497234	4	10096983	52.3685	3.65233e-08	1.29e-09	680	1794	0	0.0158861	35.2862	2129.72	977.631	24.9958	greenyellow
AT1G14590	0.626143	0.00184855	NA	1.27348	0.439276	1	10087778	54.3001	3.65609e-08	1.29e-09	9885	0	0.0288066	0.0387195	31.7385	2042.05	239.079	19.0937	lightgreen
AT1G14600	1	0.00218389	0.214744	1.33094	0.440252	1	10085559	55.1874	3.65609e-08	1.29e-09	12104	2164	0	0.00015194	398.157	2077.98	117.893	49.8865	pink
AT1G14610	0.625706	0.00144221	0.156592	1.71063	0.437331	1	10078392	53.1304	3.65345e-08	1.3e-09	8230	2481	0	0.0484737	12.3814	2728.67	3345.7	12.7159	yellow
AT1G14620	0.59625	0.00205993	0.105747	NA	0.450142	2	10071870	60.0839	3.64589e-08	1.3e-09	6055	306	0	0.0260267	30.3204	2859.23	439.87	21.6064	magenta
AT1G14630	0.562727	0.00314292	0.154682	NA	0.447871	2	10066745	56.813	3.64667e-08	1.3e-09	1110	1570	0	0.0003762	426.776	2592.86	63.6124	45.6434	green
AT1G14640	0.548339	0.00282045	0.315394	NA	0.450181	2	10063119	51.6967	3.6174e-08	1.3e-09	0	5196	0	0.0153101	68.189	1821.24	251.225	48.3356	blue
AT1G14642	NA	0.00285626	NA	NA	0.485714	1	10060181	58.5339	3.6174e-08	1.3e-09	556	8134	0	0.0110299	219.584	1927.66	22.6636	58.782	blue
AT1G14650	0.709351	0.00182719	0.123686	NA	0.466073	3	10059229	51.1156	3.61405e-08	1.3e-09	0	9086	0	0.0399697	21.4395	3476.33	2085.26	15.3601	yellow
AT1G14660	0.592612	0.00332068	0.239533	NA	0.427565	2	10054602	57.1976	3.60524e-08	1.3e-09	1681	13713	0	0.0494827	20.3229	3202.75	266.716	25.207	blue
AT1G14670	0.734333	0.00372093	NA	0.292414	0.450815	1	10048969	53.185	3.60823e-08	1.3e-09	3913	14755	0	0.0654989	24.2158	2678.23	3839.08	18.7605	yellow
AT1G14680	0.525628	0.0080657	0.172756	3.89975	0.413517	1	10045791	55.5431	3.60823e-08	1.3e-09	2543	13385	0	0.000341818	310.85	2050.6	21.7504	47.3911	blue
AT1G14685	0.5435	0.00178374	0.0566854	NA	0.452381	4	10044305	53.6823	3.60823e-08	1.3e-09	0	9796	0	0.0383313	176.117	3418.82	1131.22	25.3641	blue
AT1G14686	0.624652	0.00131867	0.163422	0.651599	0.439216	1	10040904	53.6147	3.61428e-08	1.3e-09	0	8459	0	0.00133449	250.25	NA	NA	NA	NA
AT1G14687	0.655	0.0029644	0.36	0.932296	0.504931	1	10038763	54.0088	3.61284e-08	1.3e-09	2117	6599	0	0.000239412	435.55	1917.06	69.9318	33.2617	blue
AT1G14688	0.228437	0.00584091	0.945062	4.61445	0.397661	1	10037019	55.0411	3.61284e-08	1.3e-09	3861	4369	0	0.0316091	328.946	NA	NA	NA	NA
AT1G14690	0.562058	0.00711511	0.188495	NA	0.418322	2	10034889	55.4429	3.61578e-08	1.3e-09	2898	53	0	0.0283303	33.3497	1832.63	1226.43	17.9034	pink
AT1G14700	0.656837	0.00253138	0.135147	NA	0.416894	4	10027962	55.0167	3.61299e-08	1.3e-09	0	0	0.0535575	0.000243623	343.874	2101.66	1192.78	73.3912	greenyellow
AT1G14710	0.525429	0.00119694	0.277309	NA	0.475637	2	10024851	53.0286	3.61299e-08	1.3e-09	2967	0	0.0797784	0.0439182	23.9204	3272.69	1696.33	21.0254	green
AT1G14720	0.7944	0.00162822	0.140667	1.58267	0.443443	1	10020020	59.8332	3.61299e-08	1.3e-09	7798	0	0.0236879	0.000176741	317.908	2755.3	1452.83	23.6986	blue
AT1G14730	0.725	0.00117004	0.113327	NA	0.496296	1	10013514	56.9197	3.60993e-08	1.3e-09	8023	1985	0	0.000191031	346.184	3164.9	105.127	63.2668	turquoise
AT1G14740	0.588	0.000585425	0.0607305	0.534758	0.436421	1	10011366	54.4957	3.60993e-08	1.3e-09	4840	0	0.0913307	0.0159478	35.321	2718.87	3117.62	24.6181	purple
AT1G14750	0.438565	0.00112159	0.191437	NA	0.454839	4	10007319	56.5076	3.60609e-08	1.3e-09	285	450	0	0.00198416	137.986	1011.83	41.5287	116.866	turquoise
AT1G14755	0.457667	0.0042457	0.615293	NA	0.434599	1	10002869	54.9017	3.60563e-08	1.3e-09	25	4521	0	0.00178974	621.091	NA	NA	NA	NA
AT1G14760	0.745462	0.00317949	0.57834	NA	0.363636	3	10002230	60.4403	3.60563e-08	1.3e-09	664	3600	0	0.000272489	400.438	2531.9	5.7845	103.62	turquoise
AT1G14770	0.463778	0.00386928	0.539394	NA	0.426357	2	9999950	52.2584	3.59921e-08	1.3e-09	2944	0	0.015625	0.0221299	60.0174	1332.37	231.005	41.1171	turquoise
AT1G14780	0.751182	0.00132952	0.0777474	0.353557	0.468153	1	9995736	59.3637	3.59915e-08	1.3e-09	4697	1746	0	0.000796229	278.479	2572.64	132.884	75.4548	turquoise
AT1G14790	0.691327	0.00366431	0.181031	0.660701	0.421781	1	9992584	54.6865	3.59915e-08	1.3e-09	579	4898	0	0.0243669	42.8808	2742.49	749.628	37.0875	lightyellow
AT1G14800	0	0.00209257	0.191432	NA	0.441558	1	9986973	55.7343	3.60135e-08	1.3e-09	0	10509	0	0.332399	36.9152	NA	NA	NA	NA
AT1G14810	0.789727	0.00255566	0.0921463	NA	0.468972	2	9984121	54.4496	3.60482e-08	1.3e-09	1814	13361	0	0.0230564	43.9587	2369.28	2168.23	23.3341	tan
AT1G14820	0.451333	0.000941605	NA	NA	0.453878	3	9981570	51.0135	3.6088e-08	1.3e-09	4365	15912	0	0.0135874	73.9024	2930.12	433.27	22.1633	turquoise
AT1G14830	0.646571	0.0011227	0.0243115	0.392198	0.441192	1	9979129	55.2745	3.61624e-08	1.3e-09	6806	12610	0	0.0448429	22.3157	2925.29	2377.65	12.7054	turquoise
AT1G14840	0.700908	0.00596343	0.109836	NA	0.438017	2	9974844	53.0943	3.63605e-08	1.3e-09	8120	8842	0	0.0364455	31.5252	3258.11	897.04	25.4985	brown
AT1G14850	0.563941	0.000986184	0.313795	2.80242	0.45529	1	9970022	55.0137	3.65131e-08	1.3e-09	75	797	0	0.056596	13.1293	3438.09	1050.67	19.8801	yellow
AT1G14860	0.6872	0.0018909	0.49297	NA	0.433145	1	9961875	46.6125	3.65361e-08	1.3e-09	868	77	0	0.000237405	359.035	2008.85	104.183	153.217	turquoise
AT1G14870	0.780143	0.00477906	0.230903	NA	0.46841	2	9958201	57.5715	3.65361e-08	1.3e-09	149	837	0	0.000786877	329.106	2666.97	738.259	96.0166	turquoise
AT1G14880	0.567667	0.00461441	NA	1.64861	0.460526	1	9954039	56.2322	3.66181e-08	1.3e-09	1747	616	0	0.00214868	232.052	1798.45	4897.66	205.223	lightyellow
AT1G14890	0.760737	0.00821989	0.214873	0.39245	0.525758	1	9949671	56.3975	3.67671e-08	1.3e-09	6115	1375	0	0.000152201	524.155	1956.9	375.214	54.0662	green
AT1G14900	0.832364	0.00472212	0.195695	1.03598	0.55122	1	9948429	48.1452	3.67061e-08	1.3e-09	7357	0	0.0821006	0.000160819	425.133	2919.94	355.955	73.4803	turquoise
AT1G14910	0.743073	0.011033	NA	NA	0.47619	2	9946833	56.8867	3.66604e-08	1.3e-09	8953	30	0	0.0175821	45.7474	2550.88	1395.24	23.9327	blue
AT1G14920	0.818275	0.00602678	0.0821038	0.152906	0.485019	1	9937563	51.4652	3.65457e-08	1.3e-09	18223	0	0.109285	0.000146048	533.476	2949.5	1730.79	35.0649	blue
AT1G14930	0.569333	0.00190423	0.325003	0.415523	0.508547	1	9934282	54.03	3.63397e-08	1.3e-09	21504	362	0	0.00109288	344.717	1405.54	22.0605	271.071	darkgrey
AT1G14940	0.724882	0.00551103	NA	NA	0.5	2	9932008	54.0872	3.62912e-08	1.3e-09	23778	2636	0	0.0013342	357.127	NA	NA	NA	NA
AT1G14950	0.650125	0.0064217	0.0712384	0.438133	0.514957	1	9929209	56.641	3.62714e-08	1.3e-09	26577	5435	0	0.00206956	212.332	NA	NA	NA	NA
AT1G14960	0.436	0.00192266	NA	1.05164	0.512987	1	9927353	50.4617	3.62752e-08	1.3e-09	28433	7291	0	0.000900197	555.338	2524.41	27.5488	189.35	turquoise
AT1G14970	0.796641	0.00232925	0.142196	NA	0.462404	3	9924900	59.2293	3.61722e-08	1.3e-09	29042	2994	0	0.0336316	31.8375	2885.34	137.702	39.0767	green
AT1G14980	0.44675	0.00486867	NA	NA	0.515152	2	9921056	61	3.63096e-08	1.3e-09	27284	1236	0	0.000138076	444.07	2859.1	2024.29	29.5726	tan
AT1G14990	0.713917	0.00602019	0.126231	NA	0.45614	2	9919632	53.9553	3.62306e-08	1.3e-09	25887	0	0.113764	0.00102799	272.012	2387.36	286.75	22.1458	blue
AT1G15000	0.671367	0.00736963	0.13686	1.387	0.513109	1	9918081	58.7398	3.61833e-08	1.3e-09	24157	0	0.132252	0.000223083	316.528	1936.39	430.847	30.98	blue
AT1G15002	NA	NA	NA	NA	NA	NA	NA	NA	NA	NA	NA	NA	NA	NA	NA	1277.6	4.61705	87.972	turquoise
AT1G15010	0.5419	0.0035331	0.310733	1.13635	0.482517	1	9915364	58.7605	3.60895e-08	1.3e-09	22267	52	0	0.129241	49.56	1938.38	228.493	150.545	purple
AT1G15015	0.395154	0.0065395	NA	3.73823	0.397516	1	9914464	60.3939	3.60895e-08	1.3e-09	21300	952	0	0.0239278	83.2277	NA	NA	NA	NA
AT1G15020	0.492	0.00291219	0.193244	3.73823	0.445495	3	9914313	57.3272	3.60895e-08	1.3e-09	17744	0	0.0532015	0.0387472	25.9996	2378.27	775.116	18.6643	lightcyan
AT1G15030	0.662267	0.00299485	0.191654	1.2665	0.457987	2	9909065	56.4313	3.6051e-08	1.3e-09	14174	172	0	0.0194305	31.6665	2686.07	1277.02	22.3112	brown
AT1G15040	0.17625	0.000607567	0.124472	NA	0.468013	2	9906658	55.9637	3.60329e-08	1.3e-09	12821	83	0	0.0209943	54.7994	2084.91	27.4465	277.947	turquoise
AT1G15050	0.494643	0.00216443	0.439787	NA	0.456989	2	9904554	55.9901	3.60469e-08	1.3e-09	10810	256	0	0.0113263	66.9099	1791.21	16.493	110.502	greenyellow
AT1G15060	0.751156	0.00227435	0.146529	NA	0.465746	3	9903287	57.0848	3.60469e-08	1.3e-09	7117	1523	0	0.0411961	30.7771	3076.89	936.522	25.4736	pink
AT1G15080	0.720389	0.0087041	0.0665725	0.270031	0.44559	1	9898996	54.1599	3.59843e-08	1.3e-09	4550	0	0.0550588	0.00130206	275.423	2254.73	70.0682	44.0005	green
AT1G15085	NA	0.00326225	NA	NA	0.405556	1	9894326	61	3.59963e-08	1.3e-09	1369	0	0.0157233	0.00090133	400.839	NA	NA	NA	NA
AT1G15100	0.601667	0.00421085	NA	5.24122	0.485043	1	9893261	56.2117	3.59963e-08	1.3e-09	9	12	0	0.000358206	347.98	3593.37	323.116	45.6924	turquoise
AT1G15110	0.7652	0.00173702	0.0548702	NA	0.450808	4	9887605	55.3786	3.59669e-08	1.3e-09	75	141	0	0.0122101	58.9258	4035.33	303.817	46.8793	turquoise
AT1G15120	0	0.00161735	0.101967	NA	0.40519	2	9883952	54.3092	3.599e-08	1.3e-09	3728	0	0.165089	0.00192418	173.304	2291.03	2496.19	23.9377	lightgreen
AT1G15125	0.6245	0.00108499	0.188037	NA	0.496212	2	9882233	53.773	3.599e-08	1.3e-09	5447	1406	0	0.00920686	129.869	2359.34	3185.31	134.683	blue
AT1G15130	0.726857	0.000876155	0.164677	0.193164	0.470287	1	9880543	52.9174	3.60293e-08	1.3e-09	7137	3096	0	0.0237628	29.8172	3231.53	2489.81	16.1703	yellow
AT1G15140	0.848	0.00100052	0.0993997	NA	0.479297	3	9876364	56.0414	3.59174e-08	1.3e-09	11316	7275	0	0.00903362	103.658	2761.52	2144.27	26.4519	black
AT1G15150	0.553933	0.00103845	NA	NA	0.477459	2	9874070	53.736	3.59174e-08	1.3e-09	13610	5160	0	0.00949978	103.774	2298.59	37.0512	81.9069	white
AT1G15160	0.397333	0.00104349	0.374561	1.93215	0.469945	1	9871200	54.6835	3.5933e-08	1.3e-09	16480	2657	0	0.030296	33.2097	2238.34	114.02	33.5169	brown
AT1G15165	NA	0.00105531	NA	23.698	0.442424	1	9868826	59.8518	3.59739e-08	1.3e-09	18854	89	0	0.019221	40.343	2176.71	102.29	27.8468	brown
AT1G15170	0.75925	0.0017943	0.130343	NA	0.468188	2	9866142	57.4385	3.59739e-08	1.3e-09	21538	0	0.0777907	0.0164546	55.7846	2935.87	372.247	33.7754	turquoise
AT1G15175	NA	NA	NA	NA	NA	NA	NA	NA	NA	NA	NA	NA	NA	NA	NA	3149.6	121.212	48.6942	black
AT1G15180	0.580393	0.00117571	0.202668	NA	0.469979	2	9862251	55.9004	3.59391e-08	1.3e-09	25429	13	0	0.0119051	74.57	2392.3	1222.7	35.4596	black
AT1G15190	NA	0.001524	NA	0.503482	0.522088	1	9859563	52.6479	3.59374e-08	1.3e-09	28117	2701	0	0.000326176	358.828	2208.66	21.169	54.338	purple
AT1G15200	0.764658	0.0010979	0.305323	NA	0.453645	4	9858245	51.18	3.59374e-08	1.3e-09	29435	4019	0	0.0122683	56.0202	2374.83	1900.73	23.3129	grey60
AT1G15210	0.790238	0.00373252	0.0435065	0.0871139	0.445599	1	9855200	51.8344	3.59521e-08	1.3e-09	28840	262	0	0.00597865	70.387	2163.62	96.0171	288.013	turquoise
AT1G15215	0.735364	0.00194801	0.31659	NA	0.441509	4	9848501	56.3836	3.59521e-08	1.3e-09	25675	0	0.00249004	0.0425423	35.809	2627.5	234.338	22.707	blue
AT1G15220	0.8398	0.00227835	0.152659	NA	0.483193	2	9846516	50.4408	3.59521e-08	1.3e-09	24185	1724	0	0.00566212	108.712	2215.62	212.577	16.203	blue
AT1G15230	0.6015	0.000654777	0.249318	NA	0.504274	1	9844472	54.2624	3.59357e-08	1.3e-09	22464	3	0	0.000279167	414.135	2340.26	596.766	29.7249	blue
AT1G15240	0.683109	0.000906873	0.320299	NA	0.432909	5	9843162	56.7804	3.59357e-08	1.3e-09	17033	0	0.00621352	0.0547684	13.2082	3547.19	1528.15	15.1884	yellow
AT1G15250	0.535	0.00328079	0.0197415	NA	0.469003	2	9837881	50.1888	3.5917e-08	1.3e-09	16050	0	0.247779	0.000107777	557.723	2135.29	401.174	31.411	tan
AT1G15260	0.836692	0.00649097	0.129561	0.0257194	0.446927	1	9836785	55.1592	3.5917e-08	1.3e-09	15153	107	0	0.000711705	384.57	2632	966.126	31.4559	brown
AT1G15270	NA	0.00647436	NA	NA	0.446154	1	9835895	42.7714	3.59474e-08	1.3e-09	13605	0	0.0339674	0.000675825	228.818	2158.27	3475.81	18.3412	tan
AT1G15280	0.57455	0.00191358	0.742755	NA	0.467577	2	9834260	52.4528	3.59474e-08	1.3e-09	8863	13	0	0.0411207	17.0428	1583.75	1595.85	19.8418	yellow
AT1G15290	0.486971	0.00177741	0.451817	NA	0.434846	2	9829675	55.5415	3.59717e-08	1.3e-09	571	0	0.0185856	0.0216296	31.8233	3847.21	5208.55	40.1932	pink
AT1G15300	NA	NA	NA	NA	NA	NA	NA	NA	NA	NA	NA	NA	NA	NA	NA	2479.37	85.0806	42.6052	turquoise
AT1G15310	0.257071	0.00102613	NA	25.6172	0.448611	1	9817654	55.4685	3.59542e-08	1.3e-09	289	247	0	0.00533378	91.774	3226.57	189.316	57.7546	blue
AT1G15320	0.60348	0.00303882	0.167529	NA	0.459957	2	9814289	59.1472	3.59005e-08	1.3e-09	1891	3476	0	0.00108488	201.159	NA	NA	NA	NA
AT1G15330	0.375	0.000797858	0.0906265	NA	0.484419	1	9812274	53.6006	3.58582e-08	1.29e-09	363	1948	0	0.000276099	420.792	1943.03	19.6202	461.536	turquoise
AT1G15340	0.5482	0.000996777	0.228461	NA	0.487446	2	9810929	45.1568	3.58582e-08	1.29e-09	0	0	0.14197	0.00880877	50.774	2716.4	3898.19	25.8955	grey60
AT1G15350	0.70575	0.00152417	0.216354	NA	0.460215	6	9808518	57.1836	3.58151e-08	1.29e-09	1254	0	0.143731	0.00179065	177.859	3652.38	783.803	32.4194	midnightblue
AT1G15360	0.7855	0.000635518	0.25887	NA	0.515	2	9803277	59.5129	3.58151e-08	1.29e-09	4197	3212	0	0.000256844	435.413	NA	NA	NA	NA
AT1G15370	1	0.00191746	NA	NA	0.443694	1	9799679	51.8767	3.57671e-08	1.29e-09	293	1398	0	0.0149815	76.7304	1774.57	1014.04	25.9296	brown
AT1G15380	0.8186	0.00232555	0.0765781	NA	0.48381	2	9795963	61	3.57491e-08	1.29e-09	538	319	0	0.0019057	209.668	1968.08	138.783	663.977	turquoise
AT1G15385	0.043	0.00182504	0.247426	NA	0.405405	1	9793833	50.6256	3.57491e-08	1.29e-09	2668	1204	0	0.0004557	527.73	3026.3	3.68992	134.287	turquoise
AT1G15390	0.696	0.00169283	0.14332	2.71446	0.469136	1	9791916	58.6411	3.5761e-08	1.29e-09	4585	0	0.0491174	0.000145086	429.252	2990.48	736.989	22.4541	black
AT1G15400	0.667583	0.00314109	0.0821542	NA	0.503356	3	9790789	47.6648	3.5761e-08	1.29e-09	5712	124	0	0.000237271	349.84	2103.64	1330.37	19.5253	brown
AT1G15405	NA	NA	NA	NA	NA	NA	NA	NA	NA	NA	NA	NA	NA	NA	NA	1179.54	344.129	220.364	blue
AT1G15410	0.508625	0.00129127	0.173426	NA	0.459215	2	9788221	58.9708	3.57095e-08	1.29e-09	8280	0	0.000384025	0.0220812	46.0209	2606.96	835.357	37.1197	pink
AT1G15415	0.945	0.000899456	0.165743	NA	0.457045	1	9785803	51.6937	3.57095e-08	1.29e-09	10698	1981	0	0.000120432	1023	1819.51	3.83411	111.156	tan
AT1G15420	0.727556	0.00112525	0.130157	NA	0.436081	2	9785029	52.5916	3.56822e-08	1.29e-09	11472	0	0.0254111	0.0194485	46.8884	3613.69	480.983	24.4449	magenta
AT1G15430	0.5389	0.00313228	0.0932877	NA	0.491026	2	9782447	57.8374	3.56822e-08	1.29e-09	14054	0	0.137186	0.0384877	44.6776	2671.21	386.8	31.4267	purple
AT1G15440	0.604724	0.00233167	0.207963	NA	0.459489	2	9780518	57.7872	3.56704e-08	1.29e-09	15983	0	0.00311438	0.0600176	14.9065	3699	614.067	28.7081	magenta
AT1G15460	0.709618	0.00573968	0.116517	NA	0.469786	4	9776638	55.8412	3.56596e-08	1.29e-09	19863	159	0	0.011183	76.6215	2645.91	13.9426	126.52	turquoise
AT1G15470	0.812583	0.00288466	0.0623376	NA	0.471058	2	9771046	56.6082	3.56843e-08	1.29e-09	25455	42	0	0.0343562	24.2084	1882.57	395.462	14.7631	lightgreen
AT1G15480	0.525906	0.00403195	0.474298	2.61858	0.444818	1	9768572	55.7512	3.56509e-08	1.29e-09	27929	2516	0	0.0337546	32.6241	2894.86	276.022	35.6663	darkturquoise
AT1G15490	0.683045	0.00605004	0.169756	NA	0.467899	4	9765930	55.1739	3.56509e-08	1.29e-09	29440	923	0	0.0151373	39.3855	3377.92	374.988	25.6714	midnightblue
AT1G15500	0.82413	0.00101935	0.088527	0.422798	0.460959	1	9760255	51.2119	3.5595e-08	1.29e-09	24460	847	0	0.0204852	38.8162	2714.94	6389.79	25.2928	blue
AT1G15510	0.754839	0.0013843	0.211973	0.819584	0.423299	1	9757481	56.4694	3.56546e-08	1.29e-09	21624	3621	0	0.0478872	20.1164	1926.57	269.704	30.7442	orange
AT1G15520	0.754037	0.00182048	0.0895916	NA	0.454354	2	9754687	52.3088	3.56632e-08	1.29e-09	15009	1145	0	0.00658072	65.2372	1645.4	507.45	228.213	brown
AT1G15530	0.567333	0.000543096	0.119706	1.2701	0.485033	1	9746584	55.5809	3.57083e-08	1.29e-09	11404	65	0	0.000655899	243.378	2024.76	642.558	23.2179	red
AT1G15540	0.631	0.000954568	0.244143	NA	0.461382	4	9744455	54.9068	3.57083e-08	1.29e-09	9459	0	0.0979295	0.00142433	226.7	NA	NA	NA	NA
AT1G15550	0.506833	0.000957831	0.176831	25.8323	0.499536	1	9742157	54.6982	3.57977e-08	1.29e-09	6993	0	0.0516624	0.00225531	335.963	1896.4	300.169	63.2054	turquoise
AT1G15570	0.562095	0.00359301	0.22684	1.89969	0.45085	1	9724680	54.7869	3.60089e-08	1.29e-09	2691	1102	0	0.0238242	34.8354	3021.55	275.115	40.5221	green
AT1G15580	0.9426	0.00270921	0.20201	NA	0.436992	1	9721033	54.7926	3.58367e-08	1.29e-09	5986	164	0	0.0142279	161.538	1910.39	80.3225	90.6525	tan
AT1G15590	0.652	0.00520189	0.695644	NA	0.4	2	9719248	57.9123	3.58826e-08	1.29e-09	3813	486	0	0.00128365	283.912	NA	NA	NA	NA
AT1G15600	0.599152	0.0105813	0.357787	4.35339	0.402715	1	9717622	52.6019	3.59393e-08	1.29e-09	2139	2112	0	0.0084244	388.68	NA	NA	NA	NA
AT1G15610	NA	NA	0.64165	NA	0.419399	2	9715868	54.5017	3.59393e-08	1.28e-09	624	3866	0	0.00139579	275.576	NA	NA	NA	NA
AT1G15620	NA	NA	0.602544	NA	0.410569	1	9713086	57.5387	3.5964e-08	1.29e-09	268	6217	0	0.000748588	326.321	NA	NA	NA	NA
AT1G15625	NA	0.00728289	NA	3.49476	0.423573	1	9711790	54.8144	3.59861e-08	1.29e-09	68	4882	0	0.00122104	281.542	NA	NA	NA	NA
AT1G15630	0.446615	0.00513654	NA	2.73474	0.411914	1	9709752	55.4387	3.60843e-08	1.29e-09	169	2736	0	0.00126748	226.44	2399.43	5.04341	122.199	turquoise
AT1G15640	0.671952	0.00387978	NA	NA	0.406156	2	9707659	52.0601	3.60868e-08	1.29e-09	273	553	0	0.00107037	271.678	2369.29	5.75814	133.038	turquoise
AT1G15660	0.500385	0.00296492	0.797361	4.5728	0.430595	1	9705513	55.8079	3.60868e-08	1.29e-09	2419	65	0	0.0334965	28.6752	3014.74	417.564	31.5173	green
AT1G15670	0.591304	0.00534582	0.39429	0.659219	0.503704	1	9696593	57.4263	3.62471e-08	1.29e-09	0	621	0	0.00574004	406.025	2917.65	958.961	59.8873	turquoise
AT1G15680	0.496955	0.00485504	0.667409	3.63836	0.449311	1	9693138	58.0304	3.64645e-08	1.29e-09	716	1431	0	0.00923349	354.258	NA	NA	NA	NA
AT1G15690	0.928031	0.00179226	0.0181675	NA	0.470385	2	9687619	48.1834	3.62235e-08	1.29e-09	6235	0	0.0367647	0.00662963	79.4186	2666.6	17372	22.1145	turquoise
AT1G15700	0.451	0.00126957	0.121263	1.27968	0.440999	1	9683976	55.1324	3.61434e-08	1.29e-09	9878	473	0	0.000839296	348.283	1523.62	101.496	39.0243	turquoise
AT1G15710	0.856077	0.00330836	0.0683499	0.013855	0.456825	1	9682415	54.6098	3.61503e-08	1.29e-09	11439	0	0.0320045	0.00020864	339.435	2338.45	414.49	26.7766	greenyellow
AT1G15720	0.562886	0.00314085	0.313014	2.3137	0.445865	1	9680520	54.694	3.61503e-08	1.29e-09	13334	0	0.0212038	0.00191848	193.19	2487.37	47.7504	32.8083	green
AT1G15730	0.51725	0.00234998	0.231844	4.54282	0.461767	1	9679144	59.0944	3.61572e-08	1.29e-09	12339	503	0	0.0047331	121.093	2135.91	1314.63	26.0083	black
AT1G15740	0.670438	0.00159222	0.117998	0.7549	0.428896	1	9675637	56.81	3.61003e-08	1.29e-09	7463	0	0.00972084	0.0245377	35.3027	2856.3	4223.25	31.9142	lightcyan
AT1G15750	0.871739	0.000970493	0.0275665	NA	0.454947	4	9671728	55.699	3.62583e-08	1.29e-09	1349	0	0.0119028	0.0614339	16.8752	3420.84	4929.07	27.7142	yellow
AT1G15757	0.124	0.00281383	1.29456	NA	0.373016	1	9662303	60.9645	3.65718e-08	1.29e-09	1044	780	0	0.00294142	979.346	NA	NA	NA	NA
AT1G15760	0.632643	0.00306699	0.371685	2.19012	0.46798	1	9660929	51.457	3.60813e-08	1.29e-09	2418	2154	0	0.000152556	458.685	2862.07	36.5581	58.0825	turquoise
AT1G15770	0.535048	0.00797705	1.08247	7.72641	0.427438	1	9659837	57.2168	3.60355e-08	1.29e-09	3510	3246	0	0.00085941	269.378	NA	NA	NA	NA
AT1G15772	NA	0.007206	NA	NA	0.403361	4	9658025	55.1698	3.58698e-08	1.29e-09	5322	5058	0	0.000338231	653.296	1317.26	6.23411	136.163	turquoise
AT1G15780	0.6892	0.00290317	0.119996	NA	0.461107	3	9656505	52.4474	3.58456e-08	1.29e-09	0	5544	0	0.0531292	14.1707	3045.41	2199.66	18.6221	yellow
AT1G15790	0.248429	0.00434482	0.386463	NA	0.405263	5	9648374	54.5421	3.58785e-08	1.29e-09	0	2031	0	0.000291366	335.56	2564.63	255.532	70.3528	lightyellow
AT1G15800	0.3215	0.00144039	NA	NA	0.538901	1	9645473	54.4387	3.56816e-08	1.29e-09	2865	0	0.315141	0.000513013	235.576	3521.88	230.602	37.907	blue
AT1G15810	0.749333	0.00155621	0.68564	3.62267	0.446825	1	9642325	57.3574	3.56604e-08	1.29e-09	5329	0	0.106183	0.00463709	99.5505	3515.64	614.809	18.3071	magenta
AT1G15820	0.769	0.00115388	0.163589	NA	0.564994	1	9640083	52.0533	3.55875e-08	1.29e-09	4013	0	0.0902044	0.000320754	718.92	3526.88	119177	50.3715	greenyellow
AT1G15825	0.5775	NA	NA	NA	0.532808	1	9638472	50.2997	3.56404e-08	1.29e-09	3285	0	0.233209	NA	NA	2810.44	145.395	66.4618	greenyellow
AT1G15830	0.59025	0.000807658	0.254953	NA	0.576446	3	9638485	34.4505	3.56404e-08	1.29e-09	1276	0	0.0488663	0.000650501	257.594	3120.06	632.068	58.9196	greenyellow
AT1G15840	0.0738	0.00193504	NA	10.9631	0.611549	1	9635113	35.6086	3.55993e-08	1.29e-09	0	3304	0	0.00040855	341.039	2421.59	7.80155	251.804	turquoise
AT1G15850	0.454333	0.00339862	NA	3.93878	0.449173	1	9633300	52.9978	3.55339e-08	1.29e-09	1167	5117	0	0.00338127	614.653	NA	NA	NA	NA
AT1G15860	1	0.0022234	NA	NA	0.409283	3	9631779	60.3046	3.55339e-08	1.29e-09	2688	3353	0	0.00449248	104.413	2203.12	931.995	15.6152	brown
AT1G15870	0.686056	0.00691513	0.316369	0.970644	0.412894	1	9629461	48.8025	3.54545e-08	1.29e-09	5006	1946	0	0.0046582	91.8499	1663.35	96.3535	74.3114	blue
AT1G15880	0.657714	0.00613451	0.0621169	0.0740314	0.4377	1	9628147	56.3764	3.54545e-08	1.29e-09	6320	16	0	0.0376105	46.4427	1110.94	705.076	21.6247	pink
AT1G15885	NA	NA	NA	NA	0.449438	1	9626068	53.7602	3.53674e-08	1.29e-09	8399	0	0.120585	0.000104493	741.62	NA	NA	NA	NA
AT1G15890	NA	NA	0.393286	NA	0.402582	2	9625236	58.6863	3.53659e-08	1.29e-09	9231	734	0	0.0167768	37.5641	1047.57	68.724	90.8876	blue
AT1G15900	0.641667	0.00344428	0.43696	0.616297	0.51462	1	9622272	57.8776	3.53659e-08	1.3e-09	12195	3698	0	0.000189905	775.363	1942.57	42.0837	49.0931	blue
AT1G15910	0.66656	0.00335099	0.359456	1.77328	0.44357	1	9621294	53.2186	3.53793e-08	1.3e-09	13173	2079	0	0.0324397	22.8985	1489.59	904.721	27.4577	cyan
AT1G15920	0.756857	0.00232104	0.328566	NA	0.43554	2	9617290	57.9573	3.53668e-08	1.3e-09	17177	110	0	0.000353938	435.168	2200.16	602.398	17.7223	blue
AT1G15930	0.736	0.00160029	NA	NA	0.501149	2	9615229	48.7073	3.53668e-08	1.3e-09	19238	0	0.0975188	0.0037553	166.998	2692.54	3257.36	22.2021	tan
AT1G15940	0.502167	0.000982452	NA	2.34518	0.428523	1	9613186	52.0676	3.53824e-08	1.3e-09	21281	988	0	0.0298585	27.3993	2135.29	1229.6	23.0686	grey60
AT1G15950	0.644722	0.00335514	0.0875685	NA	0.516908	7	9607942	55.6897	3.53176e-08	1.3e-09	26525	0	0.287311	0.000794718	274.499	3393.55	2015.41	30.8799	brown
AT1G15960	0.709207	0.00273634	NA	1.69765	0.419192	1	9604880	53.6181	3.53176e-08	1.3e-09	29587	186	0	0.00198232	129.886	1532.07	346.584	69.1086	brown
AT1G15970	0.7058	0.00230089	0.183895	NA	0.463645	2	9600272	57.1635	3.52474e-08	1.3e-09	28951	0	0.0870629	0.0201096	49.4014	2594.36	423.054	19.5563	brown
AT1G15980	0.704667	0.000728218	0.137616	1.36798	0.440837	1	9597400	57.0663	3.52474e-08	1.3e-09	26720	0	0.0630915	0.00849082	83.5348	4234.44	6252.47	37.1271	salmon
AT1G15990	0.605077	0.000973244	0.0558969	1.18985	0.417682	1	9595412	54.8428	3.51481e-08	1.3e-09	23891	1849	0	0.00408085	129.178	915.003	4.40465	323.006	brown
AT1G16000	0.1435	0.00180447	0.393418	NA	0.475096	1	9592012	54.5843	3.51481e-08	1.3e-09	22724	2344	0	0.000244765	431.165	2760.33	358.712	35.23	magenta
AT1G16010	0.94425	0.00147659	0.0451346	NA	0.449962	3	9591172	55.2762	3.51481e-08	1.3e-09	20360	0	0.00893237	0.0386835	29.7473	1617.7	1505.12	21.2748	turquoise
AT1G16020	0.54885	0.00130379	0.211304	NA	0.424419	4	9588533	55.6887	3.52151e-08	1.3e-09	16725	0	0.0498954	0.0363346	30.0723	2039.97	487.46	16.5505	brown
AT1G16022	0.6674	0.00149107	0.595759	NA	0.473118	1	9585228	51.6765	3.51999e-08	1.3e-09	16227	3139	0	0.0233157	149.457	NA	NA	NA	NA
AT1G16025	NA	0.00504966	NA	NA	0.47076	1	9585040	61	3.51999e-08	1.3e-09	16124	3327	0	4.07e-05	2449.49	NA	NA	NA	NA
AT1G16030	0.919059	0.00190432	0.0687422	0.13381	0.468315	1	9584579	52.8426	3.51999e-08	1.3e-09	13548	3788	0	0.0026275	124.526	1995.8	232.177	56.2412	magenta
AT1G16040	0.960625	0.00276054	0.540127	NA	0.433186	4	9581937	54.2306	3.51999e-08	1.3e-09	11024	6430	0	0.000888442	193.775	2684.56	286.4	24.3813	blue
AT1G16060	0.6583	0.00247705	0.111634	NA	0.464355	7	9578234	58.6662	3.51999e-08	1.3e-09	6347	2434	0	0.000177034	248.028	3083.03	272.792	39.4389	white
AT1G16070	0.586591	0.00208317	0.181359	NA	0.436348	3	9576244	56.379	3.51999e-08	1.31e-09	4103	190	0	0.00777806	121.874	2479.16	42.6868	51.2296	green
AT1G16080	0.722235	0.00166294	0.0711859	1.47373	0.472399	1	9572283	52.1001	3.5206e-08	1.31e-09	2056	0	0.0475651	0.0337798	33.6447	3729.05	3356.1	44.9821	salmon
AT1G16090	0.633464	0.00134791	0.481233	1.91346	0.445493	1	9570286	58.2593	3.5206e-08	1.31e-09	261	0	0.0485934	0.0786625	17.1133	2499.41	200.149	59.1916	brown
AT1G16110	0.728414	0.00345693	0.34588	1.54146	0.432348	1	9568326	58.7891	3.5206e-08	1.3e-09	81	0	0.075249	0.0185951	62.014	3482.48	618.197	50.0484	lightyellow
AT1G16120	0.464182	NA	NA	1.83192	0.438668	1	9563943	58.9179	3.51438e-08	1.3e-09	4464	0	0.123816	0.00262431	138.245	1730.72	11.2248	92.6076	turquoise
AT1G16130	0.439867	NA	NA	1.27942	0.443258	1	9561252	58.2065	3.50363e-08	1.3e-09	3031	0	0.12089	0.00958301	81.8303	2152.11	237.482	102.392	purple
AT1G16140	NA	NA	NA	NA	NA	NA	NA	NA	NA	NA	NA	NA	NA	NA	NA	2309.21	7.56899	138.657	turquoise
AT1G16150	0.663419	0.00319518	0.259191	2.94553	0.440507	1	9554247	56.4575	3.51039e-08	1.3e-09	345	3	0	0.00967538	92.4222	1515.41	81.2992	182.053	brown
AT1G16160	0.624947	0.00333885	NA	1.22546	0.444444	1	9550779	58.5069	3.51374e-08	1.3e-09	3813	1210	0	0.0316717	44.6844	1161.05	8.72403	163.656	turquoise
AT1G16170	0.825222	0.00509933	0.116968	0.371972	0.44086	1	9547879	54.406	3.5025e-08	1.3e-09	6713	0	0.218399	0.000456176	388.115	2501.04	579.747	42.7697	black
AT1G16180	0.819182	0.00210425	0.0392827	NA	0.453592	2	9546495	52.5242	3.50957e-08	1.3e-09	8097	0	0.167543	0.0192627	38.6776	2989.17	5226.47	15.7892	blue
AT1G16190	0.803	0.00362769	0.135807	NA	0.456188	2	9543426	52.7208	3.51004e-08	1.3e-09	11166	0	0.0231156	0.0322123	23.1826	2414.84	615.957	18.1005	turquoise
AT1G16210	0.5745	0.00412366	0.0544542	NA	0.513475	1	9540446	43.6791	3.51031e-08	1.3e-09	14146	0	0.136556	0.000523144	264.773	2367.46	1869.63	20.706	grey60
AT1G16220	0.572514	0.00418231	0.185188	1.26846	0.452575	1	9538283	55.6025	3.50853e-08	1.3e-09	16309	511	0	0.0370534	31.2157	2236.52	99.4109	38.4783	green
AT1G16225	0.188533	0.00720188	NA	NA	0.412281	3	9535754	56.7415	3.50962e-08	1.3e-09	18838	3040	0	0.00297026	154.895	NA	NA	NA	NA
AT1G16230	0.444184	0.0150121	NA	3.80967	0.407216	1	9533078	60.1277	3.50962e-08	1.3e-09	21514	2240	0	0.00441546	161.823	NA	NA	NA	NA
AT1G16240	0.646692	0.00664564	0.125684	NA	0.434907	4	9531702	56.4857	3.50962e-08	1.3e-09	22890	0	0.0579421	0.00877786	88.0453	2069.76	1821.35	17.2855	blue
AT1G16250	NA	0.00824816	0.0973963	NA	0.451389	2	9529581	52.4116	3.51018e-08	1.3e-09	25011	0	0.0160344	0.0188858	42.2585	2434.1	375.774	20.0184	lightcyan
AT1G16260	0.565519	0.0104707	0.299836	NA	0.428571	3	9527047	55.3192	3.51071e-08	1.3e-09	27545	0	0.057885	0.0305555	54.4734	2375.57	476.758	89.6404	brown
AT1G16270	0.681895	0.00212058	0.234131	NA	0.445703	3	9523684	54.6422	3.5112e-08	1.3e-09	30908	0	0.00925926	0.0551707	15.5002	3217.55	1272.84	17.7677	yellow
AT1G16280	0.656069	0.00315175	0.147116	1.18654	0.436314	1	9518803	55.7687	3.5112e-08	1.3e-09	35789	3415	0	0.0136595	51.5769	3316.73	289.909	24.0306	blue
AT1G16290	0.6796	0.0014873	0.138672	NA	0.436674	2	9515792	57.3024	3.5112e-08	1.3e-09	38800	136	0	0.00963422	78.1277	NA	NA	NA	NA
AT1G16300	0.232375	0.00149795	0.180223	8.49402	0.464766	1	9512288	54.777	3.51145e-08	1.3e-09	42304	0	0.00386215	0.027835	22.3186	3574.08	283.301	40.5071	turquoise
AT1G16310	0.782	0.00136325	0.115526	NA	0.452991	2	9508280	56.5539	3.50618e-08	1.3e-09	46312	0	0.0478508	0.00340933	142.147	2527.95	118.459	36.0971	turquoise
AT1G16320	0.717286	0.00191146	0.232416	6.42802	0.416058	1	9505724	53.9624	3.50543e-08	1.3e-09	48868	0	0.0509745	0.000538248	341.614	3641.9	1151.67	29.1454	brown
AT1G16330	0.3676	0.00168965	0.271459	20.6252	0.411402	1	9504158	54.685	3.50269e-08	1.3e-09	47084	1499	0	0.0122206	66.6671	2654.27	52.4915	49.7332	green
AT1G16340	0.671485	0.00299993	0.130833	NA	0.446712	4	9498823	59.602	3.49898e-08	1.3e-09	43784	0	0.109211	0.0418645	25.7706	2272.37	348.811	30.2026	blue
AT1G16350	0.550294	0.0010283	0.0743438	1.93608	0.46786	1	9495789	54.8066	3.49274e-08	1.3e-09	41447	0	0.141699	0.033956	29.1466	2434.12	1259.92	23.8879	magenta
AT1G16360	0.7606	0.00236346	0.126804	NA	0.416904	5	9493275	56.1886	3.49274e-08	1.3e-09	38731	362	0	0.00252908	186.185	1751.22	22.814	64.2687	red
AT1G16370	0.69661	0.00454896	0.133426	0.823211	0.434866	1	9489912	51.3037	3.48829e-08	1.3e-09	36098	0	0.0517906	0.00876398	112.769	2859.84	267.664	113.742	steelblue
AT1G16380	0.483095	0.00152228	0.152303	2.11833	0.426209	1	9488134	56.9808	3.48722e-08	1.3e-09	33178	1114	0	0.00561444	116.362	NA	NA	NA	NA
AT1G16390	0.568882	0.00147792	0.189044	2.39282	0.454721	1	9483759	57.5521	3.49447e-08	1.3e-09	29775	5	0	0.00455944	134.913	2023.24	216.558	83.0603	brown
AT1G16400	0.446333	0.00197276	0.233767	1.33332	0.442379	1	9481501	57.4498	3.49447e-08	1.3e-09	27047	2263	0	0.00241383	208.035	1688.57	530.153	54.172	pink
AT1G16410	0.462577	0.00211879	0.171313	2.85919	0.44898	2	9477863	57.6484	3.49454e-08	1.3e-09	22481	2409	0	0.00149841	191.643	3371.46	8987.31	73.3557	white
AT1G16420	0.688917	0.00279272	0.677608	1.00406	0.437173	1	9474395	57.4146	3.49454e-08	1.3e-09	20525	453	0	0.00306316	171.283	2426.59	62.0047	177.9	red
AT1G16430	0.875125	0.00355086	0.0941327	1.73388	0.450331	1	9471952	54.153	3.49454e-08	1.29e-09	18885	0	0.0290262	0.00154861	277.767	2356.68	130.702	25.0184	tan
AT1G16440	0.758146	0.0081484	0.0545662	0.432599	0.440667	1	9470737	55.1631	3.49518e-08	1.29e-09	16873	1185	0	0.00316216	169.902	2500.3	12.2465	86.426	turquoise
AT1G16445	0.5596	0.00384564	0.37757	2.95355	0.442424	1	9468759	55.6593	3.49518e-08	1.29e-09	15089	3116	0	0.00537981	139.145	2457.95	147.282	50.9575	blue
AT1G16460	0.445474	0.003397	0.705666	NA	0.445092	6	9467000	56.0951	3.49518e-08	1.3e-09	11871	0	0.0329073	0.0291226	35.3041	2724.08	1962.6	21.3987	greenyellow
AT1G16470	0.861778	0.00697521	0.0275582	NA	0.433616	2	9463799	49.3082	3.49518e-08	1.3e-09	8862	0	0.0347175	0.0135247	54.8649	2592.68	1720.32	15.1185	blue
AT1G16480	0.551541	0.00261926	0.206777	NA	0.426084	2	9460846	57.8675	3.49421e-08	1.3e-09	5532	63	0	0.0691105	15.5704	2476.94	73.3752	27.2147	blue
AT1G16490	0.682765	0.00256341	0.226369	NA	0.419394	2	9456890	56.02	3.49421e-08	1.3e-09	3457	404	0	0.00269276	198.778	1602.76	43.2853	30.965	pink
AT1G16500	0.711316	0.0040883	0.288613	0.591469	0.489744	1	9447766	56.3479	3.49239e-08	1.3e-09	662	1457	0	0.000153269	665.235	2323.18	322.602	53.3541	red
AT1G16510	0.890429	0.00365568	0.18856	0.425592	0.556306	1	9441973	52.3669	3.48638e-08	1.3e-09	6455	1204	0	0.000222828	430.689	2097.14	146.067	59.2239	turquoise
AT1G16515	NA	0.00172477	0.766842	NA	0.371212	2	9439083	55.2499	3.48652e-08	1.3e-09	5575	0	0.267994	0.000138548	590.004	2206.28	44.5798	60.5898	pink
AT1G16520	0.775	0.000817926	0.203272	NA	0.470348	1	9437909	55.936	3.48048e-08	1.3e-09	2522	0	0.00197472	0.0213837	47.6175	2988.51	364.209	32.0805	green
AT1G16530	0.5255	0.00273026	0.220437	0.42358	0.48996	1	9435277	57.0077	3.4805e-08	1.3e-09	806	2628	0	0.000196193	357.363	2074.91	17.7845	85.4773	green
AT1G16540	0.581824	0.00142073	0.327818	NA	0.421115	3	9427175	57.2822	3.47655e-08	1.3e-09	0	10730	0	0.0404261	19.1824	3756	359.898	24.8353	yellow
AT1G16550	NA	NA	NA	NA	NA	NA	NA	NA	NA	NA	NA	NA	NA	NA	NA	3002.99	311.136	23.6475	yellow
AT1G16560	0.651577	0.00113131	0.143446	NA	0.45567	9	9418161	55.3322	3.47192e-08	1.3e-09	8560	14512	0	0.039866	20.9324	2497.85	1467.68	16.286	blue
AT1G16570	0.3527	0.000837437	0.192453	NA	0.42723	2	9415968	56.9329	3.47192e-08	1.3e-09	5668	11620	0	0.0288617	44.0616	2909.41	464.691	17.8752	blue
AT1G16590	0.295333	0.000943463	0.559426	NA	0.458333	2	9412838	53.7866	3.47043e-08	1.3e-09	4125	10077	0	0.00392321	169.818	2313.27	277.251	21.1784	cyan
AT1G16610	0.611448	0.00154855	0.272053	NA	0.519562	7	9411050	46.7898	3.47431e-08	1.3e-09	395	6347	0	0.0511571	24.2224	2715.81	1347.09	19.054	midnightblue
AT1G16630	0.604372	0.00439379	0.502885	2.25269	0.424744	1	9404572	50.5615	3.47374e-08	1.3e-09	100	311	0	0.000735639	185.148	3099.75	110.926	48.5109	green
AT1G16635	NA	NA	NA	NA	NA	NA	NA	NA	NA	NA	NA	NA	NA	NA	NA	1444.22	5.5938	84.9719	turquoise
AT1G16640	0.439	0.00105425	0.795014	NA	0.409877	1	9400020	56.235	3.47576e-08	1.3e-09	4013	0	0.0074813	0.000554407	750.689	2373.62	54.0264	60.3083	red
AT1G16650	0.497923	0.000899781	0.251836	NA	0.438365	3	9398674	57.6704	3.47341e-08	1.29e-09	371	27	0	0.0396171	19.6839	3229.78	281.172	29.9065	magenta
AT1G16670	0.824375	0.000968679	0.0543371	0.0889929	0.427962	1	9389329	58.5432	3.48918e-08	1.29e-09	517	0	0.0478343	0.0210766	39.9414	3490.73	624.794	43.4422	lightyellow
AT1G16680	0.4725	0.00108032	NA	0.120581	0.422823	1	9384392	57.7238	3.48567e-08	1.29e-09	5454	4811	0	0.0461407	16.4045	2462.51	666.616	12.7998	yellow
AT1G16690	0.480308	0.00100843	0.267386	2.90955	0.449242	1	9380648	54.8432	3.51873e-08	1.29e-09	9198	4266	0	0.0340287	27.2343	1998.13	256.482	15.5415	greenyellow
AT1G16700	0.95	0.00110379	NA	NA	0.479821	1	9376921	55.868	3.51803e-08	1.29e-09	12925	1786	0	0.0299524	22.8357	2264.99	1674.08	20.0395	lightgreen
AT1G16705	NA	0.000843884	0.369243	NA	0.446154	3	9374523	44.7218	3.51971e-08	1.29e-09	15323	77	0	0.00111534	200.286	793.54	13.5798	168.666	red
AT1G16710	0.566869	0.000954043	0.283252	NA	0.435462	10	9372751	54.3275	3.52294e-08	1.29e-09	17095	0	0.0199524	0.0583648	14.1447	3312.93	1604.82	17.0704	yellow
AT1G16720	0.715467	0.00119942	0.0606002	NA	0.466245	3	9363654	56.1588	3.49496e-08	1.29e-09	26192	728	0	0.0188325	50.5303	3716.13	7699.91	38.3717	pink
AT1G16730	0.666833	0.00257807	0.33191	1.4555	0.487685	1	9360177	55.204	3.49496e-08	1.29e-09	29669	0	0.193455	0.000163256	434.306	3407.78	255.811	76.408	brown
AT1G16740	0.529	0.0056077	0.0217329	NA	0.472441	1	9358923	48.8732	3.49496e-08	1.29e-09	30923	0	0.0736278	0.0040465	178.105	2488.1	645.02	24.4076	tan
AT1G16750	0.701158	0.00479943	0.204518	NA	0.453459	2	9357488	56.4816	3.49398e-08	1.3e-09	32358	669	0	0.0243225	46.0598	2014.87	319.226	28.8776	pink
AT1G16760	0.726	0.00425551	0.160196	NA	0.437746	2	9352355	55.4495	3.50253e-08	1.29e-09	37491	1312	0	0.00355997	124.922	NA	NA	NA	NA
AT1G16770	0.589038	0.00297151	0.277495	NA	0.474872	3	9348706	54.134	3.50701e-08	1.29e-09	41140	4808	0	0.00112036	284.865	1280.49	18.0341	110.236	brown
AT1G16780	0.429	0.0018739	NA	NA	0.442092	3	9347077	57.5372	3.51276e-08	1.29e-09	40327	0	0.14587	0.0252772	36.395	1859.14	521.797	28.152	blue
AT1G16790	0.529571	0.00272446	NA	NA	0.512644	1	9342210	56.7281	3.51276e-08	1.29e-09	39704	0	0.815135	0.000176318	515.067	2621.93	273.856	26.8229	black
AT1G16800	0.575145	0.00150224	0.267226	NA	0.423589	3	9342061	56.4779	3.50974e-08	1.29e-09	29495	0	0.0686391	0.0565727	11.0988	2702.69	321.997	21.2726	yellow
AT1G16810	0.692769	0.00662484	0.473266	NA	0.427586	3	9330957	54.9574	3.50859e-08	1.29e-09	28068	0	0.0680428	0.0261963	59.5417	2691.65	1360.93	27.2752	grey60
AT1G16820	0.445167	0.00677628	0.469123	NA	0.41844	4	9329710	57.0891	3.49018e-08	1.29e-09	26310	1159	0	0.00303203	209.994	2410.92	65.4419	52.3488	blue
AT1G16825	0.7085	0.00305406	NA	NA	0.472222	2	9327690	59.2323	3.49007e-08	1.29e-09	24454	3179	0	0.0083727	76.2418	2056.77	115.056	24.6978	lightgreen
AT1G16830	0.6163	0.00422423	0.33767	0.54223	0.402299	1	9325919	57.3898	3.49072e-08	1.29e-09	22344	4950	0	0.0629525	43.0732	2815.97	46.0961	39.3484	magenta
AT1G16840	0.702506	0.00646665	0.286479	NA	0.477366	5	9323851	49.6112	3.49607e-08	1.29e-09	20779	7018	0	0.000405773	365.944	3201.42	1294.14	31.3346	blue
AT1G16850	0.8	0.00524863	0.291274	0.730074	0.466231	1	9321738	54.097	3.49973e-08	1.29e-09	19165	7404	0	0.000177143	433.602	2245.84	197.096	107.987	blue
AT1G16860	0.893667	0.00158163	0.0618318	0.386693	0.465965	1	9319245	54.3027	3.51498e-08	1.29e-09	14361	2600	0	0.025757	22.4061	NA	NA	NA	NA
AT1G16870	0.497188	0.00129498	0.232796	1.55198	0.453915	1	9315813	57.7752	3.53087e-08	1.29e-09	11641	0	0.0467001	0.0362853	23.9885	2806.33	714.033	18.9555	magenta
AT1G16880	0.760844	0.00729263	0.162408	NA	0.438717	2	9313033	53.2631	3.5595e-08	1.29e-09	8655	0	0.238827	0.000663847	209.642	3701.36	9647.8	28.0257	salmon
AT1G16890	0.821368	0.00581698	NA	NA	0.429448	3	9310368	49.6394	3.57183e-08	1.29e-09	6434	79	0	0.00263216	138.191	2214.43	2917.24	13.7035	lightgreen
AT1G16900	0.688583	0.00123521	0.172333	0.16853	0.43958	1	9307537	59.3813	3.57183e-08	1.29e-09	2530	3	0	0.0389815	22.1479	2488.25	599.149	44.8521	turquoise
AT1G16905	0.585577	0.00229306	0.201672	1.81128	0.453616	1	9304090	57.757	3.57183e-08	1.29e-09	1123	0	0.0952381	0.00459316	167.702	2761.81	7.11783	157.215	turquoise
AT1G16910	0.3366	0.00122093	NA	NA	0.474747	1	9301542	53.7648	3.57194e-08	1.29e-09	0	1089	0	0.000196824	394.947	NA	NA	NA	NA
AT1G16916	0.53925	0.00174668	0.197533	NA	0.459547	2	9299988	58.5102	3.57194e-08	1.29e-09	1222	0	0.258732	0.000296891	452.154	2356.49	182.919	33.7506	tan
AT1G16920	0.602143	0.00542577	0.0132557	0.0395473	0.465438	1	9299395	55.3158	3.57498e-08	1.29e-09	1815	0	0.143319	0.00138174	249.669	2943.51	877.231	26.9577	green
AT1G16930	0.619455	0.00230177	0.243451	NA	0.395556	3	9296866	59.0709	3.56635e-08	1.29e-09	4344	0	0.024108	0.0012893	192.452	1858.02	213.256	22.2152	turquoise
AT1G16940	0.353136	0.00209013	NA	4.6827	0.377011	1	9294562	58.8813	3.56635e-08	1.29e-09	3769	2255	0	0.00228842	193.848	NA	NA	NA	NA
AT1G16945	NA	0.00124014	NA	NA	0.39899	1	9292640	57.4759	3.57818e-08	1.29e-09	3063	4177	0	0.00255809	883.379	NA	NA	NA	NA
AT1G16950	0.766333	0.00267508	0.14685	5.09378	0.492908	1	9290666	59.6299	3.59208e-08	1.29e-09	594	6151	0	0.00168246	310.364	NA	NA	NA	NA
AT1G16960	0.68575	0.00226936	0.0867486	4.17216	0.455072	1	9286804	58.9387	3.59208e-08	1.29e-09	1831	10013	0	0.0169661	105.01	2173.66	267.338	32.8671	blue
AT1G16970	0.75175	0.00115351	0.193275	NA	0.412111	1	9285778	56.554	3.59208e-08	1.29e-09	0	11039	0	0.0394552	17.1792	2541.6	530.237	18.4989	magenta
AT1G16980	0.381538	0.00199381	0.377981	NA	0.404212	2	9279345	51.9254	3.61471e-08	1.29e-09	0	16675	0	0.0054908	221.165	NA	NA	NA	NA
AT1G17000	NA	0.00260948	NA	NA	NA	NA	9273817	NA	3.61451e-08	1.29e-09	28	11623	0	0.00378084	249.656	NA	NA	NA	NA
AT1G17010	0.508778	0.00213353	NA	1.13256	0.438306	1	9268978	60.4552	3.61319e-08	1.29e-09	203	8933	0	0.009479	128.704	NA	NA	NA	NA
AT1G17020	0.412333	0.00127527	0.177873	7.45808	0.429898	1	9266465	57.0758	3.6218e-08	1.29e-09	0	6272	0	0.00750651	87.4122	3238.2	156.69	115.734	turquoise
AT1G17030	0.367231	0.00122857	0.21142	2.28092	0.44334	1	9264236	60.0566	3.6218e-08	1.29e-09	2218	3821	0	0.00367248	135.764	2042.75	38.8248	43.8536	darkgreen
AT1G17040	0.590757	0.00157777	NA	NA	0.41411	3	9261774	53.9748	3.66416e-08	1.29e-09	4680	19	0	0.0349304	18.944	2427.34	263.695	16.9794	pink
AT1G17050	0.791111	0.00310382	0.118766	0.772103	0.429027	1	9257630	59.4944	3.68972e-08	1.29e-09	8824	80	0	0.020875	67.2036	4074.71	1331.96	56.0754	brown
AT1G17060	0.58815	0.00193156	0.0698036	NA	0.415074	1	9254451	59.8414	3.69499e-08	1.29e-09	12003	0	0.0162003	0.00228788	182.834	2268.14	242.828	42.3573	turquoise
AT1G17065	NA	NA	NA	NA	0.442257	1	9254242	55.5486	3.69499e-08	1.29e-09	12212	1404	0	NA	NA	NA	NA	NA	NA
AT1G17070	0.646265	0.0040779	0.220409	1.24287	0.439608	1	9248955	56.7614	3.74914e-08	1.29e-09	17499	27	0	0.0543298	18.6169	3058.86	387.318	21.0048	magenta
AT1G17080	NA	0.00209508	NA	NA	0.473118	1	9246276	49.8376	3.75816e-08	1.29e-09	20178	0	0.07109	0.000346699	299.1	2398.52	1420.92	16.7132	lightgreen
AT1G17090	NA	0.00159284	0.3728	NA	0.390071	5	9244377	58.5417	3.75751e-08	1.29e-09	18435	0	0.0790909	0.000117297	424.866	2745.36	57.307	43.2581	turquoise
AT1G17100	0.3732	0.000774401	0.11729	0.374869	0.497854	1	9241899	54.4483	3.75751e-08	1.29e-09	17141	0	0.146654	0.00020018	377.138	3029.13	1513.56	45.3263	brown
AT1G17110	0.610788	0.00171438	0.280254	NA	0.432723	3	9240870	54.3394	3.75751e-08	1.29e-09	11868	477	0	0.0530762	23.3097	2337.32	1679.65	13.3215	yellow
AT1G17120	0.780148	0.00447566	0.0715685	0.426375	0.452341	1	9234685	55.7573	3.73208e-08	1.29e-09	8815	0	0.0714286	0.0128161	82.6642	2069.99	837.625	17.9571	midnightblue
AT1G17130	0.761452	0.00643314	0.32731	NA	0.427729	2	9232452	57.5424	3.73208e-08	1.29e-09	6105	0	0.0337812	0.0168143	61.7859	2328.11	981.896	14.6794	grey60
AT1G17140	0.732429	0.00364514	NA	NA	0.467633	2	9229972	52.7526	3.72522e-08	1.29e-09	4252	0	0.0328615	0.00095268	239.53	2088.74	941.719	30.9876	pink
AT1G17145	0.739444	0.00809867	0.172404	NA	0.411303	2	9226467	46.0179	3.7244e-08	1.29e-09	0	1073	0	0.027905	33.0619	1421.55	611.67	41.313	blue
AT1G17147	0.633	0.00544195	0.185451	0.374219	0.468013	1	9223436	54.8774	3.7244e-08	1.29e-09	0	0	0.101998	0.0688717	73.8292	2320.7	205.625	87.066	red
AT1G17150	0.591159	0.00579618	0.482997	1.99778	0.416046	1	9220838	58.887	3.65563e-08	1.29e-09	2105	819	0	0.102892	57.3126	NA	NA	NA	NA
AT1G17160	0.809509	0.00405533	0.150214	NA	0.484211	2	9219010	56.9102	3.65563e-08	1.29e-09	3933	2647	0	0.000873648	252.611	2730.06	558.402	25.7616	turquoise
AT1G17170	0.448435	0.0047727	0.206805	2.0024	0.456621	1	9217002	55.3952	3.65563e-08	1.29e-09	5941	2550	0	0.000201873	525.463	3172.33	776.767	148.002	turquoise
AT1G17180	0.732846	0.00437924	0.156012	0.787496	0.436937	1	9214521	52.2434	3.65563e-08	1.29e-09	8422	309	0	0.00163069	249.923	2230.33	132.245	306.078	turquoise
AT1G17190	0.477083	0.00600247	0.277066	8.62696	0.435897	1	9211250	56.4723	3.65269e-08	1.29e-09	11693	1587	0	0.000311883	376.134	1558.6	204.291	99.9329	turquoise
AT1G17200	0.801176	0.00538798	0.0725961	0.0701821	0.484553	2	9208155	54.3018	3.62403e-08	1.29e-09	10452	4590	0	0.00144096	259.65	2046.54	1300.7	25.6677	brown
AT1G17210	0.5954	0.00319111	0.11531	1.42814	0.461592	1	9206549	55.4264	3.62114e-08	1.29e-09	5752	0	0.0232315	0.0512782	15.8812	2519.02	2090.33	17.5836	yellow
AT1G17220	0.679571	0.00319693	0.125261	0.231823	0.447257	1	9201538	53.4826	3.60121e-08	1.29e-09	25	0	0.0240262	0.0560837	14.7164	3983.91	10996.7	25.2528	salmon
AT1G17230	0.622862	0.00149724	0.234904	NA	0.428865	3	9195929	55.9601	3.60559e-08	1.29e-09	12	0	0.0499337	0.0386914	33.8143	2293.21	283.969	25.5831	darkorange
AT1G17235	0.4855	0.00406056	0.448739	2.96135	0.386111	1	9191194	57.8258	3.60559e-08	1.29e-09	2618	4470	0	0.00044465	525.013	1654.24	4.07132	72.4342	yellow
AT1G17240	0.666403	0.00320034	0.388878	NA	0.430385	2	9190160	55.7453	3.60559e-08	1.29e-09	0	5504	0	0.0147968	135.52	1073.41	35.369	79.1621	brown
AT1G17250	0.565556	0	NA	4.13741	0.431088	1	9185376	54.6	3.60606e-08	1.29e-09	1268	10288	0	0.00634786	196.12	NA	NA	NA	NA
AT1G17255	NA	NA	NA	NA	NA	NA	NA	NA	NA	NA	NA	NA	NA	NA	NA	952.188	15.1566	125.54	turquoise
AT1G17260	0.732793	0.00679	NA	0.493932	0.432841	1	9182487	55.9973	3.60501e-08	1.29e-09	2827	11118	0	0.0147374	50.8043	1032.88	44.3752	63.2953	turquoise
AT1G17270	0.643698	0.00536158	0.209906	NA	0.438938	2	9177460	57.4314	3.60018e-08	1.29e-09	17	8308	0	0.0337431	30.9638	1003.07	253.084	26.5406	blue
AT1G17280	0.769231	0.00262429	0.0872694	NA	0.434426	9	9169713	59.6172	3.59372e-08	1.29e-09	249	0	0.070466	0.0406856	19.4116	2919.28	1187.42	11.9931	brown
AT1G17285	0.34	0.00370463	0.952016	NA	0.445355	2	9166003	53.1283	3.59148e-08	1.29e-09	3959	276	0	0.00364011	631.143	2870.42	9.25116	102.237	turquoise
AT1G17290	0.741148	0.00174943	0.151825	0.730721	0.450368	1	9164213	50.4804	3.58123e-08	1.29e-09	5749	0	0.0125338	0.0328176	22.9395	2371.33	5425.35	20.7552	red
AT1G17300	0.414818	0.00350112	NA	NA	0.433107	2	9159909	56.4295	3.58123e-08	1.3e-09	10053	3860	0	0.00143662	241.025	2482.11	5.26047	139.753	turquoise
AT1G17310	0.538909	0.00207947	0.271784	NA	0.461426	2	9158620	55.7419	3.58151e-08	1.3e-09	11342	2811	0	0.000706899	333.774	NA	NA	NA	NA
AT1G17330	0.771133	0.00196395	0.237234	0.559206	0.463378	1	9156719	53.9443	3.58189e-08	1.3e-09	13243	0	0.119467	0.00513513	110.758	2143.76	437.098	29.1633	red
AT1G17340	0.730063	0.00140134	0.237887	0.775055	0.428753	1	9152765	57.7559	3.57549e-08	1.3e-09	17197	0	0.0301707	0.0409925	28.3854	3256.32	1208.6	24.7347	red
AT1G17345	0.636462	0.00839217	NA	0.55743	0.472222	1	9146253	52.1522	3.58125e-08	1.3e-09	17103	0	0.41248	0.000328141	431.177	2509.28	14.5302	261.907	green
AT1G17350	0.896	0.00584759	0.0679433	NA	0.427567	5	9144996	56.0999	3.56778e-08	1.3e-09	14163	0	0.0929037	0.0248554	36.0628	2741.99	260.332	22.3731	black
AT1G17360	0.440967	0.00144234	NA	1.3532	0.408663	1	9140097	53.8899	3.55824e-08	1.3e-09	7067	0	0.0439969	0.0401653	22.4418	3940.27	1730.98	36.6686	brown
AT1G17370	0.844364	0.000659269	0.121747	NA	0.484921	2	9135003	50.7645	3.55824e-08	1.3e-09	3485	0	0.0713493	0.0235204	41.2082	3477	1988.68	20.5792	brown
AT1G17380	0.624333	0.00215822	0.622783	NA	0.453333	3	9131390	57.9114	3.55824e-08	1.29e-09	1117	0	0.045821	0.000436014	228.439	2676.89	538.56	128.242	purple
AT1G17400	0.554333	0.000786218	0.152066	NA	0.418919	3	9126074	50.1168	3.55696e-08	1.29e-09	789	1928	0	0.0382989	84.1217	2203.95	11.4078	65.3559	turquoise
AT1G17410	0.6938	0.00152826	0.404429	NA	0.441392	3	9118135	55.5548	3.55619e-08	1.29e-09	840	9239	0	0.00809544	128.001	2331.42	241.616	24.148	brown
AT1G17420	0.589722	0.00130796	0.038222	1.2237	0.473551	1	9109222	58.1964	3.54488e-08	1.3e-09	9753	0	0.0478685	0.0022968	87.1757	2887.04	3448.32	138.802	steelblue
AT1G17430	0.588263	0.00503878	0.0940053	1.32454	0.432432	1	9104400	55.363	3.54765e-08	1.3e-09	14575	2711	0	0.000152562	365.319	2559.28	326.828	41.0819	lightyellow
AT1G17440	0.81087	0.00344349	0.147645	NA	0.462963	2	9102561	52.2745	3.54765e-08	1.29e-09	11260	4550	0	0.0091771	56.8275	3099.85	1637.81	21.9824	lightyellow
AT1G17450	0.543365	0.000880543	NA	NA	0.425836	3	9098265	55.882	3.54941e-08	1.29e-09	2161	0	0.0262737	0.0625883	11.4538	3256.84	699.487	28.8695	yellow
AT1G17455	0.863	0.00127114	NA	NA	0.408696	2	9089488	49.4465	3.54523e-08	1.29e-09	595	0	0.146468	0.00101716	298.093	3040.11	202.837	45.6332	blue
AT1G17460	0.614718	0.00132379	0.81933	NA	0.416	3	9087780	54.6356	3.53469e-08	1.29e-09	0	0	0.015373	0.0185574	38.2381	2939	162.606	39.3547	blue
AT1G17470	0.432333	0.00101358	NA	NA	0.4425	2	9083657	53.8363	3.50305e-08	1.29e-09	2882	0	0.0334942	0.0400768	23.638	2777.8	2267.1	15.5394	blue
AT1G17480	0.3555	0.00147561	0.170608	NA	0.468638	1	9080132	53.9365	3.50521e-08	1.29e-09	791	0	0.127334	0.0265646	50.8606	2523.53	103.453	45.0084	blue
AT1G17490	0.28	0.00150626	0.313985	NA	0.418803	1	9078108	48.1722	3.50521e-08	1.29e-09	0	0	0.270325	0.00374557	383.567	2554.92	251.859	31.8785	grey60
AT1G17500	0.869	0.000782597	0.0975228	NA	0.422076	2	9068737	56.8467	3.54263e-08	1.28e-09	3692	793	0	0.041773	25.6345	3106.5	1304.72	28.3355	blue
AT1G17510	0.611	0.000344712	0.712938	NA	0.485095	1	9063041	52.3713	3.54466e-08	1.28e-09	9388	0	0.0173697	0.00017899	494.511	2757.91	229.335	26.3213	blue
AT1G17520	0.712556	0.00187409	0.342164	NA	0.440716	4	9061909	53.9049	3.52412e-08	1.28e-09	10520	0	0.12116	0.0242021	30.0401	2035.09	437.816	13.8998	grey60
AT1G17530	0.5882	0.00138506	NA	NA	0.507092	2	9059058	57.0184	3.52305e-08	1.28e-09	13371	0	0.217925	0.000770712	321.835	3067.27	581.206	43.3403	blue
AT1G17540	0.585208	0.00176953	0.355922	3.49077	0.454961	1	9057407	53.6298	3.5224e-08	1.28e-09	15022	1060	0	0.0313918	27.0324	NA	NA	NA	NA
AT1G17545	0.491727	0.00270128	NA	0.773821	0.411111	1	9053436	58.6431	3.52488e-08	1.28e-09	18993	12	0	0.00264172	708.734	NA	NA	NA	NA
AT1G17550	0.770625	0.00204573	0.132867	NA	0.429527	2	9052275	56.7585	3.51977e-08	1.28e-09	20154	0	0.0402685	0.0472675	22.6383	3036.67	1630.99	19.1322	brown
AT1G17560	0.442571	0.00210723	0.410883	NA	0.450085	2	9049140	50.4711	3.52397e-08	1.27e-09	23289	0	0.0386399	0.00338459	247.431	2618.9	228.453	39.3399	green
AT1G17580	0.545833	0.00121952	0.236045	0.791184	0.422091	1	9047295	57.1313	3.52254e-08	1.27e-09	24872	0	0.0216558	0.0738387	11.7433	2621.91	1455.09	16.6827	yellow
AT1G17590	0.5175	0.00141231	0.647848	NA	0.424519	4	9036381	55.463	3.52281e-08	1.27e-09	21929	535	0	0.0100754	71.6892	1888.85	272.144	41.2704	red
AT1G17600	0.566966	0.00109157	0.306744	4.72474	0.438095	1	9033609	57.3591	3.52281e-08	1.27e-09	16443	3307	0	0.00521336	81.8198	3474.95	379.219	58.277	red
AT1G17610	0.512214	0.00215561	0.316459	NA	0.414885	2	9031623	56.9117	3.52263e-08	1.28e-09	16200	3636	0	4.06e-05	1722.42	3641.95	205.695	61.8959	lightyellow
AT1G17615	0.847857	0.000981457	0.30013	0.744265	0.423447	1	9027156	54.815	3.51257e-08	1.27e-09	13706	1142	0	0.00845985	119.238	NA	NA	NA	NA
AT1G17620	0.61625	0.0024527	0.23991	0.45935	0.50566	1	9024650	50.1076	3.51257e-08	1.28e-09	11195	0	0.22139	0.000210061	345.217	2710.97	2196.74	62.9422	saddlebrown
AT1G17630	0.573667	0.00202569	0.375022	NA	0.418033	2	9022063	56.5555	3.49841e-08	1.28e-09	7406	793	0	0.0264636	38.824	2737.02	58.9488	34.8281	darkturquoise
AT1G17640	0.315333	0.00133213	0.2998	NA	0.444144	3	9019459	54.0067	3.50602e-08	1.28e-09	5165	3397	0	0.00501908	143.306	2162.27	177.329	24.7457	lightcyan
AT1G17650	0.944	0.00110435	0.140439	NA	0.443825	2	9017121	53.7865	3.50661e-08	1.28e-09	2417	3582	0	0.0270201	45.9326	3269.01	1115.11	29.4722	black
AT1G17665	0.6141	0.00145346	0.321845	0.368237	0.424779	1	9014392	55.1641	3.51019e-08	1.28e-09	32	1197	0	0.00242991	119.021	2595.9	162.33	214.507	blue
AT1G17680	0.5216	0.00117588	0.268773	NA	0.428837	3	9010474	57.8444	3.52619e-08	1.28e-09	357	0	0.0121739	0.0583825	15.0455	3234.72	869.639	16.3509	blue
AT1G17690	0.426056	0.000980584	0.396218	2.28156	0.40574	1	9003823	57.3656	3.52728e-08	1.28e-09	7008	0	0.00883392	0.0560364	13.671	2898.4	475.499	27.0084	magenta
AT1G17700	0.463714	0.00251796	0.203632	1.24026	0.488029	1	8997085	58.8435	3.52846e-08	1.28e-09	12115	928	0	0.00842457	169.127	2387.37	86.245	54.908	green
AT1G17710	0.521182	0.00169411	0.200245	NA	0.415476	2	8996140	48.6341	3.52846e-08	1.28e-09	10427	1873	0	0.000982014	235.006	1921.14	26.5829	175.245	turquoise
AT1G17720	0.811375	0.00120203	0.0813785	NA	0.434263	2	8993360	57.669	3.54265e-08	1.27e-09	4011	0	0.0302339	0.050029	17.467	3557.03	1935.37	13.0279	turquoise
AT1G17730	0.8595	0.000349459	0.114928	NA	0.45915	1	8987506	48.1115	3.55964e-08	1.27e-09	2057	54	0	0.00112552	232.432	3195.35	994.383	14.8499	brown
AT1G17744	NA	0.00139026	NA	NA	0.535147	1	8985584	48.503	3.55527e-08	1.27e-09	471	1214	0	0.000229958	358.681	NA	NA	NA	NA
AT1G17745	0.700969	0.00152075	0.0794329	NA	0.481595	2	8985581	56.0732	3.55569e-08	1.27e-09	0	0	0.0458485	0.0412584	35.5833	2632.9	1263.41	83.4403	red
AT1G17750	0.6615	0.00243505	0.418469	1.77439	0.437404	1	8980222	57.4012	3.53668e-08	1.26e-09	3232	2926	0	0.0287268	33.6232	2379.68	137.24	69.4225	purple
AT1G17760	0.55812	0.00228207	0.23289	2.03814	0.434014	1	8976438	55.2652	3.54034e-08	1.26e-09	1442	6710	0	0.0544049	14.321	1881.41	560.859	19.0108	yellow
AT1G17770	0.705727	0.00296713	0.496072	1.55838	0.439001	1	8965804	55.2355	3.52254e-08	1.25e-09	12	16616	0	0.00088305	250.352	NA	NA	NA	NA
AT1G17780	0.567407	0.00246249	NA	NA	0.400253	6	8962978	54.2925	3.51456e-08	1.25e-09	0	14099	0	0.00327676	684.749	2460.89	404.493	22.7634	turquoise
AT1G17790	0.60475	0.00217601	0.45122	2.23453	0.428962	1	8961267	51.5512	3.51396e-08	1.25e-09	88	11871	0	0.00285442	109.976	1575.44	278.978	12.8444	blue
AT1G17800	0.637375	0.00398922	0.288374	3.62916	0.444444	1	8957722	56.5721	3.51924e-08	1.25e-09	475	9930	0	0.00214521	390.359	NA	NA	NA	NA
AT1G17810	0.949625	0.00159159	0.137628	NA	0.514925	1	8956520	53.7374	3.51739e-08	1.25e-09	1677	7811	0	0.00503434	143.272	2051.25	24.1736	342.255	darkgrey
AT1G17820	0.5616	0.00161935	0.196626	2.30963	0.434909	1	8955008	56.7528	3.51739e-08	1.25e-09	3189	4093	0	0.0286044	38.0172	2678.35	597.347	19.1358	pink
AT1G17830	0.689643	0.00301304	0.341528	2.10207	0.414201	1	8950794	58.3208	3.52913e-08	1.25e-09	3136	938	0	0.00392564	171.842	2153.76	87.2806	71.5944	purple
AT1G17840	0.875085	0.00616324	0.0204453	0.00765	0.460227	1	8944143	57.1279	3.52881e-08	1.25e-09	123	355	0	0.0134427	60.4612	2403.8	2911.43	27.3437	yellow
AT1G17850	0.671783	0.00492018	0.323084	NA	0.435041	2	8940619	57.9495	3.52881e-08	1.25e-09	3647	0	0.0623549	0.0320071	32.4326	2612.54	514.416	29.4963	orange
AT1G17860	0.455708	0.00783202	0.427449	7.14136	0.43824	1	8937367	55.4492	3.53528e-08	1.25e-09	6363	0	0.117305	0.0002406	498.181	1805.28	1083.5	67.502	turquoise
AT1G17870	0.759038	0.0132218	0.141811	0.812732	0.449477	1	8936606	57.4436	3.53528e-08	1.25e-09	4179	661	0	0.040259	51.0055	2451.3	215.82	104.612	brown
AT1G17880	0.717	0.00884303	0.145307	0.195573	0.447791	1	8934161	46.1506	3.53219e-08	1.25e-09	2419	0	0.0700438	0.00156847	202.468	2817.36	3527.44	22.52	tan
AT1G17890	0.750375	0.0106774	0.0502775	NA	0.463019	3	8932281	51.2008	3.53398e-08	1.25e-09	597	0	0.073329	0.0325044	84.4453	2070.49	886.425	21.9397	green
AT1G17910	0.549167	0.0210163	NA	3.36869	0.423529	1	8927419	58.8711	3.53344e-08	1.25e-09	262	3084	0	0.00792407	141.733	NA	NA	NA	NA
AT1G17920	0.708831	0.00680375	NA	NA	0.414729	2	8924675	53.1716	3.536e-08	1.25e-09	3006	5828	0	0.0154281	54.9608	2507.82	171.198	33.0321	blue
AT1G17930	0.776842	0.00501965	NA	NA	0.437022	2	8920325	57.0529	3.536e-08	1.25e-09	7356	5580	0	0.0389714	25.8266	2002.62	339.96	16.2466	blue
AT1G17940	0.69275	0.00314586	0.0434426	NA	0.426108	6	8917260	56.5788	3.53681e-08	1.25e-09	10421	1152	0	0.0274686	37.2796	1878.9	436.161	41.4244	blue
AT1G17950	0.720857	0.00208455	0.165348	0.238463	0.432	1	8909064	53.3123	3.53756e-08	1.25e-09	16984	2681	0	0.000981861	390.281	2819.86	11.4047	83.1935	turquoise
AT1G17960	0.414643	0.00348243	0.430141	NA	0.448076	2	8905680	58.051	3.53923e-08	1.25e-09	12467	85	0	0.00238835	118.972	2131.13	17.9969	106.764	turquoise
AT1G17970	0.428333	0.000864233	0.271593	NA	0.451671	2	8901828	56.3693	3.53923e-08	1.25e-09	8774	451	0	0.0135626	75.8045	2795.03	745.575	36.1509	lightcyan
AT1G17980	0.50275	0.000255786	0.3964	NA	0.43324	2	8899080	54.6226	3.54194e-08	1.25e-09	4565	3199	0	0.041632	23.7033	2858.1	1376.07	26.0709	purple
AT1G17990	NA	NA	NA	NA	0.481481	2	8894512	55.3819	3.54758e-08	1.25e-09	2180	7767	0	0.00900901	244.949	NA	NA	NA	NA
AT1G18000	NA	NA	0.126444	NA	0.484783	1	8892119	52.0616	3.54586e-08	1.25e-09	0	10160	0	NA	NA	NA	NA	NA	NA
AT1G18010	NA	NA	NA	NA	0.484783	1	8886855	52.0616	3.54646e-08	1.25e-09	0	15424	0	NA	NA	NA	NA	NA	NA
AT1G18020	NA	NA	0.316018	NA	0.481481	1	8884310	55.3819	3.54555e-08	1.25e-09	2391	14036	0	NA	NA	NA	NA	NA	NA
AT1G18030	0.26425	0.000284239	0.262628	NA	0.453598	2	8882286	54.384	3.54555e-08	1.25e-09	2614	11282	0	0.0282427	32.527	1940.33	411.789	36.6946	brown
AT1G18040	0.6562	0.000355284	0.0866442	2.5397	0.431122	1	8879674	55.2267	3.55059e-08	1.25e-09	74	8742	0	0.0219162	33.3528	1819.62	212.285	24.9567	green
AT1G18050	0.11875	0.000494198	NA	NA	0.485926	1	8876774	60.5004	3.56166e-08	1.25e-09	0	6682	0	0.158036	49.6999	NA	NA	NA	NA
AT1G18060	0.0565	0.000324764	0.127944	NA	0.449339	1	8874713	59.3289	3.56165e-08	1.25e-09	0	4679	0	0.0442082	41.2114	4128.94	3244.56	41.4947	salmon
AT1G18070	0.834	0.000389318	0.123756	NA	0.417892	3	8872894	56.0897	3.56536e-08	1.26e-09	147	0	0.0242924	0.0328698	17.6462	2862.89	3471.75	13.5285	royalblue
AT1G18075	NA	NA	NA	NA	NA	NA	NA	NA	NA	NA	NA	NA	NA	NA	NA	2223.95	60.5163	56.1047	turquoise
AT1G18080	NA	0.000747588	0.019794	NA	0.51626	1	8864344	44.6643	3.56782e-08	1.25e-09	2941	0	0.0475024	0.000370339	253.863	2884.35	7473.44	21.7897	tan
AT1G18090	0.47055	0.000900948	0.42043	NA	0.426759	2	8862140	57.4755	3.56782e-08	1.26e-09	2394	2108	0	0.0164139	45.0072	2439.91	127.732	22.7671	black
AT1G18100	1	0.00232618	0.0528859	NA	0.517241	1	8859328	58.1208	3.58648e-08	1.26e-09	22	4920	0	0.000220696	355.177	2749.95	17.1194	178.452	turquoise
AT1G18130	0.319833	0.00319146	NA	NA	0.445783	1	8850650	54.4962	3.61295e-08	1.26e-09	0	1377	0	0.269712	28.8468	NA	NA	NA	NA
AT1G18140	0.703	0.00273094	0.164579	0.55897	0.468499	1	8847706	57.0814	3.64324e-08	1.26e-09	876	0	0.0377994	0.000271845	256.281	2551.54	42.324	134.025	turquoise
AT1G18150	0.949143	0.00222298	0.0697358	NA	0.425989	3	8842247	52.5722	3.59283e-08	1.25e-09	6335	0	0.0755732	0.0244779	45.6478	2757.08	1629	19.0859	blue
AT1G18160	0.720368	0.00108076	0.231639	NA	0.449815	2	8837926	54.7154	3.57704e-08	1.26e-09	10656	292	0	0.041782	19.0211	2737.55	2308.83	13.6689	yellow
AT1G18170	0.7175	0.0013344	0.183135	0.0382606	0.49328	1	8832451	55.8834	3.58007e-08	1.26e-09	16131	5767	0	0.000769287	308.498	3406.23	1246.95	22.4574	black
AT1G18180	0.531667	0.00178813	0.184501	NA	0.433551	2	8830809	58.5339	3.58142e-08	1.26e-09	14550	7409	0	0.0250711	33.9872	1107.52	101.811	77.7601	green
AT1G18190	0.518	0.000864329	NA	10.1133	0.435476	1	8828694	55.2835	3.58339e-08	1.26e-09	10949	5300	0	0.0267497	37.3646	2363.85	533.58	17.3357	grey60
AT1G18193	NA	NA	NA	NA	0.543544	1	8823943	51.6468	3.58152e-08	1.26e-09	9192	3543	0	0.181631	121.048	NA	NA	NA	NA
AT1G18197	NA	0.00298002	0.85034	NA	0.476543	2	8822863	59.0859	3.58338e-08	1.26e-09	7525	1876	0	0.00832106	79.5115	NA	NA	NA	NA
AT1G18200	0.542778	0.00351551	0.13649	0.756611	0.462319	1	8821129	54.4037	3.61012e-08	1.26e-09	5374	0	0.783865	0.000696937	307.411	1636.25	82.4822	76.8397	purple
AT1G18210	0.7835	0.00170928	0.064076	NA	0.528265	2	8819936	50.7837	3.61855e-08	1.26e-09	3511	0	0.621622	0.000277583	506.061	2807.66	2309.4	38.0777	purple
AT1G18220	NA	0.000269362	NA	NA	0.398551	1	8816875	50.5	3.62428e-08	1.26e-09	2643	702	0	0.000131708	1458.53	NA	NA	NA	NA
AT1G18250	0.713381	0.00292818	0.0767132	NA	0.52517	2	8809768	50.9133	3.62608e-08	1.26e-09	2724	7809	0	0.000233164	323.411	2784.34	343.381	52.6787	green
AT1G18260	0.752485	0.00306749	0.0697971	0.628331	0.459008	1	8807757	55.3854	3.60809e-08	1.26e-09	4735	9820	0	0.0208685	35.0807	2725.69	1441.92	15.3494	yellow
AT1G18265	0.369	0.000758884	0.709255	14.3673	0.398577	1	8804312	56.0444	3.59951e-08	1.26e-09	8180	10514	0	0.000217437	451.136	2528.86	62.6961	84.4228	blue
AT1G18270	0.708137	0.000852296	0.174435	NA	0.441176	4	8803175	55.8904	3.61394e-08	1.26e-09	8589	0	0.0124247	0.0357238	21.2787	2954.64	2708	26.1327	yellow
AT1G18280	0.812	0.00119619	0.226607	NA	0.54512	1	8792385	54.3233	3.62964e-08	1.26e-09	7210	73	0	0.000338822	304.346	NA	NA	NA	NA
AT1G18290	1	0.00100549	0.688233	8.38107	0.457627	1	8789326	55.0493	3.63061e-08	1.26e-09	4254	30	0	0.000333651	459.741	2851.49	9.45581	207.691	turquoise
AT1G18300	0.8205	0.00441367	0.094568	1.59652	0.433987	1	8786876	56.8992	3.64561e-08	1.26e-09	1443	0	0.0611829	0.000511427	396.99	2029.29	826.025	177.958	purple
AT1G18310	0.514143	0.00161588	NA	1.53135	0.447692	1	8785345	56.0993	3.62892e-08	1.26e-09	0	69	0	0.0934276	50.041	NA	NA	NA	NA
AT1G18320	0.001	0	NA	NA	NA	NA	8782185	NA	3.6271e-08	1.26e-09	1204	160	0	0.00401225	825.101	1977.78	11.6744	79.106	magenta
AT1G18330	0.135143	0.00264575	0.394733	NA	0.420912	2	8780731	59.5012	3.62285e-08	1.26e-09	2658	0	0.122222	0.00255947	196.799	2601.34	289.769	80.078	lightcyan
AT1G18335	0.5	0.00184857	0.314569	NA	0.42446	3	8777620	52.9363	3.62353e-08	1.26e-09	3311	0	0.0469579	0.0225359	31.4251	2027.88	210.38	19.0913	greenyellow
AT1G18340	0.72	0.000643992	0.0940792	5.46287	0.42053	1	8775102	57.1249	3.62463e-08	1.26e-09	753	0	0.0168742	0.0273672	28.9191	2749.73	277.214	16.506	black
AT1G18350	0.722625	0.00135906	NA	3.1339	0.508658	1	8770909	50.6971	3.62377e-08	1.26e-09	308	1535	0	0.000200237	417.041	2062.39	10.0341	99.6982	cyan
AT1G18360	0.439444	0.00101134	0.252369	4.71793	0.456919	1	8769850	56.8153	3.63167e-08	1.26e-09	1367	2594	0	0.023767	43.2999	3870.71	960.614	47.6772	greenyellow
AT1G18370	0.666412	0.00196074	0.116497	0.512061	0.428718	1	8767095	56.1738	3.62602e-08	1.26e-09	4122	380	0	0.0063302	89.5847	3026.8	262.07	55.6031	green
AT1G18390	0.691308	0.000727023	0.167356	1.34217	0.439186	2	8761009	57.2894	3.64174e-08	1.26e-09	10208	0	0.124031	0.000829621	157.119	2803.12	495.614	41.8056	red
AT1G18400	NA	0.000989486	NA	NA	0.420179	2	8755147	54.0779	3.65118e-08	1.26e-09	16070	0	0.272062	0.000365256	295.286	2837.36	605.868	68.4295	green
AT1G18410	0.707644	0.00353601	0.251178	NA	0.422588	5	8750245	56.0549	3.6702e-08	1.26e-09	20972	166	0	0.00292032	88.1983	1864.86	14.3395	77.809	green
AT1G18415	NA	NA	NA	NA	NA	NA	NA	NA	NA	NA	NA	NA	NA	NA	NA	2125.34	13.4171	49.685	turquoise
AT1G18420	0.69	0.00240392	0.269572	NA	0.467927	2	8743215	58.3425	3.67712e-08	1.26e-09	28002	0	0.0258475	0.0152808	61.8056	NA	NA	NA	NA
AT1G18440	0.646125	0.00146279	0.291994	NA	0.453252	2	8740571	57.1939	3.68404e-08	1.26e-09	30646	70	0	0.000631255	263.524	3201.37	441.664	19.8267	black
AT1G18450	0.586	0.0016556	0.0799183	1.08889	0.457768	1	8738497	54.8231	3.6881e-08	1.26e-09	26676	0	0.0204391	0.0287957	22.5683	1837.08	1349.44	11.5466	tan
AT1G18460	0.519091	0.000927949	0.160436	6.53734	0.432099	1	8734220	56.2725	3.69241e-08	1.26e-09	22573	0	0.0411718	0.052441	20.897	3341.05	1499.19	27.8494	greenyellow
AT1G18470	0.57125	0.00164807	0.0822071	NA	0.445869	2	8730850	56.5185	3.69241e-08	1.26e-09	18342	0	0.00580645	0.0297363	18.0706	3016.39	1811.69	23.3367	blue
AT1G18480	0.512889	0.00172713	0.147629	0.803694	0.452381	1	8724959	53.0395	3.69241e-08	1.26e-09	15625	0	0.0392954	0.0327053	37.5664	3891.57	435.533	24.0453	magenta
AT1G18485	0.565889	0.00100633	0.311258	1.6772	0.422932	1	8723503	58.2089	3.69241e-08	1.26e-09	12423	1399	0	0.0201967	31.7104	2496.17	374.343	22.9527	black
AT1G18486	0.45	0.00119665	NA	NA	0.431373	1	8720148	44.3483	3.69948e-08	1.26e-09	11933	4754	0	0.00127148	371.813	NA	NA	NA	NA
AT1G18490	0.3285	0.00102502	0.163935	5.80883	0.454653	1	8720025	55.7445	3.69948e-08	1.26e-09	9807	4877	0	0.0103719	87.6813	3478.33	394.274	15.3869	salmon
AT1G18500	0.728417	0.00318652	0.0853257	0.709518	0.447785	1	8717579	54.9143	3.69754e-08	1.26e-09	5606	7323	0	0.0239657	35.3244	2991.54	3116.91	22.1403	blue
AT1G18510	0.492875	0.00181638	0.151563	0.89949	0.433735	1	8713280	57.3176	3.6959e-08	1.25e-09	4596	10520	0	0.00902326	196.984	NA	NA	NA	NA
AT1G18520	0.704364	0.00452476	0.102218	0.749745	0.451938	1	8711639	55.7197	3.6959e-08	1.25e-09	2353	8277	0	0.000918275	271.423	NA	NA	NA	NA
AT1G18530	0.5196	0.00340255	0.0212787	NA	0.424051	1	8709922	52.7115	3.69279e-08	1.25e-09	1430	7354	0	0.00456249	377.565	NA	NA	NA	NA
AT1G18540	0.780923	0.00524447	0.0605582	0.754176	0.467236	1	8709906	47.2034	3.68849e-08	1.25e-09	106	6030	0	0.00101677	244.443	2781.24	5099.66	23.0876	tan
AT1G18550	0.685771	0.00172657	0.139327	0.972304	0.424702	1	8705104	52.4298	3.69615e-08	1.25e-09	0	23	0	0.0275648	21.1386	1871.2	151.788	37.8197	green
AT1G18560	0.722348	0.00417189	NA	1.06111	0.424506	1	8701359	57.5745	3.69927e-08	1.25e-09	3719	86	0	0.0393217	27.8236	2299.04	145.91	24.6159	yellow
AT1G18570	0.520833	0.00107362	0.353565	14.2459	0.434372	1	8697146	53.547	3.70847e-08	1.25e-09	7932	8	0	0.000213381	336.871	2706.05	1219.15	73.3058	purple
AT1G18580	0.754765	0.00124884	0.116481	0.115313	0.439901	1	8690776	55.7185	3.71534e-08	1.26e-09	4462	6378	0	0.0339485	36.9221	2850.61	561.136	14.6096	turquoise
AT1G18590	0.556833	0.00114836	0.145398	0.27991	0.430355	1	8688014	53.891	3.71534e-08	1.26e-09	2707	9140	0	0.000828037	236.262	2863.02	1428	48.2773	white
AT1G18600	0.663	0.000811678	0.178735	1.81249	0.465875	1	8686263	59.3501	3.72702e-08	1.26e-09	0	6642	0	0.0122091	52.8235	1733.51	527.431	15.0565	black
AT1G18610	0.545222	0.000512098	0.191965	NA	0.43447	2	8680938	54.8605	3.72885e-08	1.26e-09	216	0	0.0247071	0.0480719	17.9746	3056.67	264.676	28.8593	turquoise
AT1G18620	0.401978	0.000960052	0.394424	NA	0.427586	5	8676890	54.7938	3.73538e-08	1.26e-09	4264	0	0.031943	0.0370028	23.6709	2998.23	3310.92	27.9803	lightcyan
AT1G18630	0.209	0.000730772	0.614444	NA	0.459402	1	8671936	55.531	3.74357e-08	1.26e-09	9218	2356	0	0.0207886	57.1536	1806.8	228.38	23.9047	magenta
AT1G18640	0.6705	0.000846766	0.254627	NA	0.443694	2	8670376	51.7257	3.75679e-08	1.27e-09	10778	122	0	0.0317897	28.9495	2825.39	830.701	20.5756	blue
AT1G18650	0.609875	0.00385454	0.306159	NA	0.482883	2	8667707	54.4073	3.75679e-08	1.27e-09	8429	0	0.0863462	9.61e-05	446.436	3146.71	909.416	37.8556	black
AT1G18660	0.676299	0.00324581	0.106822	NA	0.433604	4	8665689	56.3014	3.78658e-08	1.27e-09	3719	1816	0	0.0300628	33.8493	3543.04	1878.17	19.4723	brown
AT1G18670	0.7384	0.003962	NA	NA	0.433195	3	8659836	53.6909	3.76745e-08	1.27e-09	0	73	0	0.0163847	53.5963	2658.81	618.474	25.5945	blue
AT1G18680	1	0.00115432	0.0969643	2.6961	0.479501	1	8654607	55.1158	3.76052e-08	1.27e-09	1827	0	0.0904025	0.00261974	227.215	2205.59	214.73	21.0519	black
AT1G18690	0.505053	0.00117618	0.212003	NA	0.450713	4	8653028	59.036	3.77806e-08	1.27e-09	3406	0	0.0392473	0.0204656	79.8863	2603.59	291.639	20.2126	blue
AT1G18700	0.579475	0.00127463	0.254566	NA	0.436626	6	8649071	55.8738	3.78102e-08	1.27e-09	1898	0	0.0870816	0.0310295	22.1868	2309.49	1249.86	11.1442	blue
AT1G18710	0.624167	0.00190223	0.78707	1.11747	0.46393	1	8635960	48.5446	3.88883e-08	1.27e-09	0	0	0.0843598	0.00012467	363.577	2375.91	911.107	91.984	brown
AT1G18720	0.6123	0.00615471	0.172879	NA	0.444444	2	8628770	59.9392	3.89893e-08	1.27e-09	1592	0	0.114405	0.00307305	180.489	2766.14	2575.02	29.1646	blue
AT1G18730	0.779259	0.00368552	0.16078	NA	0.41225	5	8626142	55.6669	3.89953e-08	1.27e-09	4220	0	0.0262616	0.000501969	543.772	3231.97	1413.99	27.2109	salmon
AT1G18740	0.863	0.000457247	0.0898133	2.40735	0.443864	1	8622696	52.9268	3.89953e-08	1.27e-09	1353	0	0.129607	0.000201531	322.602	2457.74	2237.6	92.0338	purple
AT1G18745	NA	NA	NA	NA	NA	NA	NA	NA	NA	NA	NA	NA	NA	NA	NA	2771.48	160.408	32.5695	lightgreen
AT1G18750	0.539238	0.0020652	0.124897	NA	0.39533	6	8619878	54.6864	3.89837e-08	1.27e-09	0	0	0.013261	0.00632278	86.2082	2932.28	175.211	33.5218	brown
AT1G18760	0.658179	0.00881212	NA	9.06534	0.395556	1	8615395	61	3.89837e-08	1.27e-09	678	2873	0	0.00749859	563.594	NA	NA	NA	NA
AT1G18770	0.550333	0.00814978	0.361542	2.49185	0.420561	1	8613175	55.9067	3.9776e-08	1.27e-09	2898	649	0	0.0113528	576.518	NA	NA	NA	NA
AT1G18773	0.600333	0.00528764	NA	NA	0.459459	4	8611743	45.5641	3.9776e-08	1.27e-09	2153	0	0.0602716	0.000101283	540.918	1953.15	182.451	54.9371	greenyellow
AT1G18780	0.314059	0.00208969	0.929155	35.2185	0.40184	1	8610287	58.8117	3.9776e-08	1.27e-09	897	1386	0	0.00118215	255.299	NA	NA	NA	NA
AT1G18790	0.728571	0.00245699	NA	5.53131	0.401235	1	8607766	52.7999	3.98144e-08	1.27e-09	328	3568	0	0.0035541	197.971	NA	NA	NA	NA
AT1G18800	0.448714	0.00189486	0.253094	0.4938	0.424125	1	8605432	50.9905	3.98121e-08	1.27e-09	0	0	0.0142068	0.00447118	82.5236	2255.19	848.181	23.5301	magenta
AT1G18810	0.494	0.00141765	0.467156	0.655608	0.427835	1	8601030	53.7399	4.02882e-08	1.27e-09	1073	1354	0	0.00215789	240.611	3564.74	752.978	54.4204	pink
AT1G18830	0.5707	0.00566589	0.649419	NA	0.425086	3	8597312	54.9056	4.02882e-08	1.27e-09	4791	22	0	0.00460466	94.7424	1833.52	39.9504	146.738	greenyellow
AT1G18835	0.516	0.000631054	0.119936	0.189948	0.483146	1	8590701	46.4385	3.95707e-08	1.27e-09	11402	522	0	0.000951361	428.699	1957.65	29.9659	70.4883	turquoise
AT1G18840	0.578923	0.00195941	0.341032	NA	0.430483	3	8585742	55.8401	3.94752e-08	1.27e-09	9061	3540	0	0.0370011	31.0476	2530.06	790.969	25.3568	green
AT1G18850	0.487545	0.00173753	0.166194	64.4889	0.419167	1	8581868	56.8391	3.96351e-08	1.27e-09	7086	5160	0	0.00291844	137.493	2728.1	290.732	25.507	magenta
AT1G18860	0.57131	0.00326307	0.357768	4.9729	0.42092	1	8577748	53.6427	3.97081e-08	1.27e-09	2231	305	0	0.0062325	106.169	2135.72	40.8868	355.17	turquoise
AT1G18870	0.698417	0.00510032	0.20052	NA	0.456483	3	8571172	57.1032	4.02385e-08	1.27e-09	0	2590	0	0.00954806	55.9218	2566.17	421.38	85.9293	turquoise
AT1G18871	NA	0.0100769	NA	NA	0.361582	1	8567236	61	4.03231e-08	1.27e-09	3843	6381	0	0.000184152	1399.01	NA	NA	NA	NA
AT1G18880	0.623062	0.00110747	0.188007	0.437941	0.464286	1	8565824	56.9917	4.05348e-08	1.26e-09	5255	2498	0	0.0245795	83.1788	2806.55	241.507	46.865	turquoise
AT1G18890	0.70085	0.00179277	0.0590603	0.989846	0.431624	1	8563781	54.839	4.13921e-08	1.26e-09	7298	0	0.0531401	0.0300126	24.2359	3544.17	1674.2	29.356	red
AT1G18900	0.639489	0.0046115	0.169131	NA	0.4472	4	8557561	56.4041	4.09926e-08	1.26e-09	5722	0	0.0175013	0.070357	14.4398	3222.49	668.803	27.829	red
AT1G18910	0.685174	0.00148167	0.164514	0.463882	0.410624	1	8553986	56.8058	4.08705e-08	1.27e-09	274	3511	0	0.00916788	59.0401	2229.4	548.944	54.6105	turquoise
AT1G18940	0.672162	0.00854273	0.236504	0.495087	0.421885	1	8542764	58.2783	4.03998e-08	1.27e-09	242	10028	0	0.00257684	189.503	1637.16	58.4543	59.5316	pink
AT1G18950	0.578706	0.00168569	0.184747	NA	0.437693	3	8540368	53.7641	4.03968e-08	1.27e-09	2638	3722	0	0.0455191	13.7177	2836.21	987.64	12.3297	yellow
AT1G18960	0.7665	0.00492588	NA	0.637617	0.427489	1	8533793	53.5568	4.04665e-08	1.27e-09	2134	1794	0	0.0024504	194.555	1026.29	3.80775	119.519	turquoise
AT1G18970	0.607917	0.00704092	0.213064	1.08115	0.464555	1	8532049	56.6196	4.04665e-08	1.27e-09	560	220	0	0.000996178	313.851	2013.74	23.1597	183.835	turquoise
AT1G18975	NA	0.00269788	NA	1.38808	0.487179	1	8531862	45.9178	4.04939e-08	1.27e-09	0	0	0.0838396	0.0146347	67.7548	NA	NA	NA	NA
AT1G18980	0.41	0.00120474	0.186342	NA	0.46003	1	8529364	58.0454	4.04939e-08	1.26e-09	660	1076	0	4.75e-05	2451.53	2292.79	92.6171	218.922	turquoise
AT1G18990	0.613389	0.00246149	0.19202	2.76668	0.39619	1	8527971	50.7951	3.99274e-08	1.26e-09	2053	137	0	0.0268256	68.3534	1501.42	29.2682	85.0844	greenyellow
AT1G19000	0.87725	0.00134761	0.193539	NA	0.474359	2	8526054	55.2229	3.99274e-08	1.26e-09	3970	0	0.295524	0.000286026	312.512	3801.42	7424.13	30.1419	greenyellow
AT1G19010	0.7372	0.00188896	0.299467	NA	0.434806	2	8521051	46.8473	4.02042e-08	1.26e-09	4211	0	0.0355002	0.0279796	38.2375	2584.79	190.899	24.6941	brown
AT1G19020	0.6195	0.00265807	0.45845	NA	0.494253	1	8518543	49.0867	3.975e-08	1.26e-09	3168	0	0.0767045	0.000286294	1380.38	2837.61	803.45	92.6189	purple
AT1G19025	0.693515	0.00371274	0.209836	NA	0.412121	3	8517871	54.6882	3.975e-08	1.26e-09	934	619	0	0.0256666	68.7953	1788.95	88.0403	23.5997	turquoise
AT1G19040	0.666667	NA	NA	0.176853	0.44894	1	8510468	54.6765	3.96093e-08	1.26e-09	1032	1761	0	0.00702158	107.115	NA	NA	NA	NA
AT1G19050	0.585313	0.00444449	0.187414	10.2761	0.402576	1	8508712	55.1894	3.95932e-08	1.26e-09	2788	0	0.0951417	0.000725049	343.056	3211.16	680.837	62.8886	brown
AT1G19060	0.385182	0.0052867	1.21091	5.8429	0.435302	1	8504479	56.2793	3.95932e-08	1.26e-09	3475	2467	0	0.0019427	445.537	NA	NA	NA	NA
AT1G19070	0.418	NA	NA	6.90182	0.400794	1	8502091	52.5905	3.95428e-08	1.26e-09	2371	4855	0	NA	NA	1239.04	10.0419	76.5435	blue
AT1G19080	0.088	0.00223984	NA	6.90182	0.419355	2	8502304	55.7308	3.95428e-08	1.26e-09	559	4642	0	0.0149532	58.0376	1122.31	137.454	54.0011	brown
AT1G19086	0.5032	0.00656203	NA	2.33066	0.406926	1	8498003	52.4759	3.9497e-08	1.26e-09	193	8943	0	0.442746	18.1206	NA	NA	NA	NA
AT1G19090	0.458489	0.00566307	NA	NA	NA	NA	8496710	NA	3.95103e-08	1.26e-09	75	8849	0	0.341586	71.6695	NA	NA	NA	NA
AT1G19100	0.745889	0.00211613	0.288943	0.0181313	0.422691	1	8491662	56.9421	4.04668e-08	1.26e-09	219	256	0	0.0375621	17.978	2451.74	339.803	21.8935	yellow
AT1G19110	0.708286	0.00127746	0.104773	0.19234	0.437528	1	8484440	55.2542	4.0545e-08	1.26e-09	7441	0	0.014526	0.0397088	22.5529	2527.57	1918.74	16.9183	pink
AT1G19115	0.428222	0.00389763	0.535684	NA	0.397814	4	8480308	52.4034	4.0579e-08	1.26e-09	11573	4076	0	0.000627865	289.859	NA	NA	NA	NA
AT1G19120	0.762	0.00166608	0.0968869	NA	0.416021	1	8478430	53.6657	4.0579e-08	1.26e-09	13451	3088	0	0.000630611	324.388	2067.7	564.033	20.9675	tan
AT1G19130	0.342333	0.000371842	0.140367	4.33138	0.471503	1	8477220	54.1708	4.10043e-08	1.27e-09	14661	1844	0	0.0102146	112.01	2506.23	1057.77	19.9743	blue
AT1G19140	0.032333	0.00078008	0.140785	NA	0.480298	2	8475893	54.9489	4.10043e-08	1.27e-09	13454	0	0.078141	0.0223301	33.9286	3448.63	562.161	35.6522	royalblue
AT1G19150	0.56675	0.00255266	0.15035	0.168752	0.484625	1	8473915	51.8178	4.10043e-08	1.27e-09	12091	0	0.282204	0.000176139	354.822	3535.08	2703.33	46.8948	salmon
AT1G19160	0.468714	0.00187599	0.873895	5.48045	0.423552	1	8472458	57.6751	4.11914e-08	1.27e-09	10849	539	0	0.000612197	322.455	1657.66	7.14264	73.5201	greenyellow
AT1G19170	0.535667	0.00333768	0.0888206	0.230226	0.460224	1	8469943	57.4985	4.12007e-08	1.27e-09	7057	1139	0	0.0283227	57.75	1812.98	512.197	12.5185	midnightblue
AT1G19180	0.900778	0.00493858	0.251914	NA	0.446194	3	8464768	56.603	4.12639e-08	1.27e-09	2395	0	0.195032	9.86e-05	427.066	2537.92	2379.6	89.677	purple
AT1G19190	0.4459	0.00137587	0.422695	2.82283	0.46813	1	8462722	57.7787	4.11276e-08	1.27e-09	1086	1479	0	0.000548631	531.322	2638.15	29.8512	56.0871	turquoise
AT1G19200	0.447714	0.00196031	0.550567	NA	0.439592	2	8461533	59.9938	4.11276e-08	1.27e-09	0	239	0	0.000353777	390.232	1381.28	48.2248	54.7279	brown
AT1G19210	0.735143	0.00190959	0.161983	1.00596	0.483871	1	8459751	52.77	4.11276e-08	1.27e-09	76	0	0.126257	0.000163002	468.772	1828.26	42.1953	258.492	purple
AT1G19220	0.558125	0.00121396	0.187333	2.32345	0.441889	1	8458862	56.2271	4.05306e-08	1.26e-09	0	0	0.0102733	0.0399272	25.1185	2835.61	845.398	24.4253	yellow
AT1G19230	0.826347	0.00187386	0.128654	NA	0.452606	2	8442603	57.6628	3.97324e-08	1.26e-09	2953	1972	0	0.0305065	22.8028	2974.78	54.8512	120.166	turquoise
AT1G19240	0.5092	0.00198291	0.280316	0.310834	0.47619	1	8437302	57.7255	3.96958e-08	1.26e-09	4355	7273	0	0.0394261	39.2315	2212.53	237.574	22.4508	lightgreen
AT1G19250	0.781471	0.00290295	0.169844	0.687492	0.436911	1	8436069	53.8574	3.96958e-08	1.26e-09	1606	8506	0	0.00116847	204.767	1590.77	47.5318	370.316	red
AT1G19260	0.78	0.000156106	NA	NA	0.367532	1	8429285	53.5543	3.94609e-08	1.26e-09	1651	13811	0	0.333873	32.6161	NA	NA	NA	NA
AT1G19270	0.849	0.00138341	0.105518	NA	0.427767	2	8424128	54.7131	3.94256e-08	1.26e-09	0	7348	0	0.0322446	21.7632	2887.64	596.349	30.2052	blue
AT1G19290	0.625545	0.00121473	0.265671	NA	0.411786	2	8420471	59.1768	3.91306e-08	1.26e-09	360	3804	0	0.049861	20.517	2850.7	194.921	23.2425	yellow
AT1G19300	0.95	0.00100555	0.0541806	0.162824	0.511364	1	8415450	55.2697	3.89731e-08	1.26e-09	964	603	0	0.000220149	326.311	2339.03	518.916	44.5967	purple
AT1G19310	0.793	0.00274087	0.111797	0.116171	0.478708	1	8410335	50.7422	3.89617e-08	1.26e-09	6079	0	0.0686608	0.0187844	105.641	2821.89	871.994	35.136	blue
[truncated: 26,066 more rows]
